# Supplementary material for: Modeling the toxicity of chemical pesticides in multiple test species using local and global QSTR approaches
Source: Royal Society of Chemistry journal article supplement (doi:10.1039/c5tx00321k), 2015-12-10
Supplement: c5tx00321k1.pdf [file c5tx00321k1.pdf]

## Supplementary Information

### Modeling Toxicity of Chemical Pesticides in Multiple Test Species Using Local and Global QSTR Approaches

Nikita Basant<sup>1</sup>, Shikha Gupta<sup>2</sup>, Kunwar P. Singh\*<sup>2</sup>

<sup>1</sup>ETRC, Gomtinagar, Lucknow-226010, India

<sup>2</sup>Environmental Chemistry Division,

CSIR-Indian Institute of Toxicology Research,

Post Box 80, Mahatma Gandhi Marg, Lucknow-226 001, India

\*Author for all correspondence

E-mail: [kpsingh\\_52@yahoo.com](mailto:kpsingh_52@yahoo.com); [kunwarpsingh@gmail.com](mailto:kunwarpsingh@gmail.com)

**Table S1:** Data set used in QSTR modeling

| S.No. | Chemical name                                 | CAS No.     | Taxonomic name | nta | TPSA   | PEOEVSA13 | LogP   | Hy     | Aweight | J     | pEC <sub>50</sub> /<br>pLC <sub>50</sub><br>(mM) |
|-------|-----------------------------------------------|-------------|----------------|-----|--------|-----------|--------|--------|---------|-------|--------------------------------------------------|
| 1     | (S)-Dimethenamid                              | 163515-14-8 | Daphnia magna  | 35  | 29.540 | 0.000     | 2.972  | -2.885 | 15.156  | 2.807 | 1.361                                            |
| 2     | 1,2-Benzenedicarboxaldehyde                   | 643-79-8    | Daphnia magna  | 16  | 34.140 | 0.000     | 1.312  | -2.658 | 12.809  | 2.340 | 3.188                                            |
| 3     | 1,2-Benzisothiazolin-3-one                    | 2634-33-5   | Daphnia magna  | 15  | 32.860 | 0.000     | 1.108  | -2.325 | 14.615  | 2.015 | 2.138                                            |
| 4     | 1,2-Benzisothiazolin-3-one, 2-butyl           | 4299-07-4   | Daphnia magna  | 27  | 22.000 | 0.000     | 2.863  | -2.991 | 13.871  | 1.889 | 3.330                                            |
| 5     | 1,3 Dichloropropene                           | 542-75-6    | Daphnia magna  | 9   | 0.000  | 0.000     | 1.978  | -1.393 | 21.388  | 2.191 | 3.091                                            |
| 6     | 1,3,5-Triethylhexahydro-s-triazine, VancideTH | 7779-27-3   | Daphnia magna  | 33  | 9.720  | 0.000     | 0.838  | -2.689 | 12.510  | 2.405 | 1.049                                            |
| 7     | 1,4-Bis(bromoacetoxy)-2-butene (BBAB)         | 20679-58-7  | Daphnia magna  | 24  | 52.600 | 11.939    | 1.419  | -2.176 | 22.849  | 3.060 | 3.372                                            |
| 8     | 2-(Hydroxymethylamino)ethanol                 | 34375-28-5  | Daphnia magna  | 15  | 52.490 | 0.000     | -1.482 | -1.292 | 13.673  | 2.339 | 0.558                                            |
| 9     | 2,4-D 2-EHE Selective Weed Killer             | 1928-43-4   | Daphnia magna  | 43  | 35.530 | 5.969     | 5.609  | -3.347 | 14.813  | 2.554 | 2.824                                            |

|    |                                                |            |               |    |        |       |       |        |        |       |        |
|----|------------------------------------------------|------------|---------------|----|--------|-------|-------|--------|--------|-------|--------|
| 10 | 2,4-D Acid                                     | 94-75-7    | Daphnia magna | 19 | 46.530 | 5.969 | 2.457 | -2.277 | 16.538 | 2.254 | 0.947  |
| 11 | 2,4-D Butoxyethanol Ester                      | 1929-73-3  | Daphnia magna | 38 | 44.760 | 5.969 | 3.732 | -3.025 | 15.153 | 2.004 | 2.276  |
| 12 | 2,4-D Isooctyl Ester                           | 25168-26-7 | Daphnia magna | 43 | 35.530 | 5.969 | 5.132 | -3.347 | 14.813 | 1.994 | 3.790  |
| 13 | 2,4-D Isopropyl Ester                          | 94-11-1    | Daphnia magna | 28 | 35.530 | 5.969 | 3.324 | -2.750 | 15.689 | 2.214 | 2.005  |
| 14 | 2,4-D Propylene Glycol B.E. Ester              | 1320-18-9  | Daphnia magna | 41 | 44.760 | 5.969 | 4.121 | -3.137 | 15.003 | 2.088 | 2.446  |
| 15 | 2,4-DB Acid                                    | 94-82-6    | Daphnia magna | 25 | 46.530 | 5.969 | 3.237 | -2.605 | 15.934 | 2.101 | 0.993  |
| 16 | 2,4-DP 2-Butoxyethyl Ester Weedone formula     | 53404-31-2 | Daphnia magna | 41 | 44.760 | 5.969 | 4.121 | -3.137 | 15.003 | 2.139 | 4.729  |
| 17 | 2-Benzyl-4-chlorophenol (Nipacide BCP)         | 120-32-1   | Daphnia magna | 26 | 20.230 | 0.000 | 3.636 | -3.386 | 13.840 | 1.802 | 2.569  |
| 18 | 2-Bromo-4'-hydroxyacetophenone (BHAP)          | 2491-38-5  | Daphnia magna | 18 | 37.300 | 0.000 | 1.970 | -2.516 | 18.908 | 2.268 | 1.500  |
| 19 | 2-EEEBC (Debacarb)                             | 62732-91-6 | Daphnia magna | 40 | 85.470 | 6.093 | 1.683 | -2.928 | 13.056 | 1.486 | -0.964 |
| 20 | 2-Hydroxyacetophenone                          | 118-93-4   | Daphnia magna | 18 | 37.300 | 0.000 | 0.862 | -2.658 | 12.809 | 2.240 | 0.456  |
| 21 | 2-Hydroxyethyl octyl sulfide MGK 874 repellent | 3547-33-9  | Daphnia magna | 34 | 20.230 | 0.000 | 3.072 | -2.987 | 14.015 | 2.727 | 2.711  |
| 22 | 2-Hydroxypropyl methanethiosulfonate(HPMETS)   | 30388-01-3 | Daphnia magna | 19 | 54.370 | 0.000 | 0.060 | -1.409 | 17.797 | 3.281 | 1.152  |
| 23 | 2-Methyl Benzisothiazolone(MBIT)               | 2527-66-4  | Daphnia magna | 18 | 22.000 | 0.000 | 1.600 | -2.516 | 14.378 | 2.054 | 2.254  |
| 24 | 3,5 Dimethyl-1-(hydroxymethyl)pyrazole         | 85264-33-1 | Daphnia magna | 19 | 38.050 | 0.000 | 0.450 | -2.113 | 12.898 | 2.379 | 0.600  |
| 25 | 3-Iodo-2-propynyl butyl carbamate (IPBC)       | 55406-53-6 | Daphnia magna | 24 | 38.330 | 6.093 | 1.909 | -2.390 | 22.416 | 3.042 | 3.245  |
| 26 | 4,4-Dimethyloxazolidine                        | 51200-87-4 | Daphnia magna | 18 | 21.260 | 0.000 | 0.342 | -2.005 | 12.866 | 2.400 | 0.352  |
| 27 | 4,5-Dichloro-1,2-dithiol-3-one(Dearborn 1235)  | 1192-52-5  | Daphnia magna | 10 | 17.070 | 0.000 | 0.718 | -1.125 | 23.384 | 2.436 | 1.403  |
| 28 | 4,5-Dichloro-2-n-octyl-3(2H)-isothiazolone     | 64359-81-5 | Daphnia magna | 34 | 20.310 | 0.000 | 3.709 | -2.750 | 16.569 | 2.051 | 4.733  |
| 29 | 4-Chloro-3,5-xyleneol (Ottasept))              | 88-04-0    | Daphnia magna | 19 | 20.230 | 0.000 | 2.662 | -2.658 | 14.754 | 2.487 | 1.763  |
| 30 | 4-Chloro-3-cresol                              | 59-50-7    | Daphnia magna | 16 | 20.230 | 0.000 | 2.354 | -2.465 | 15.059 | 2.346 | 1.792  |
| 31 | Acephate                                       | 30560-19-1 | Daphnia magna | 20 | 55.400 | 6.721 | 1.240 | -1.329 | 17.309 | 3.803 | 2.149  |
| 32 | Acequinocyl (AKM-05 degradate)                 | 57960-19-7 | Daphnia magna | 60 | 60.440 | 5.969 | 6.194 | -4.121 | 12.581 | 1.738 | 5.205  |

|    |                                                   |             |               |    |         |         |        |        |        |       |       |
|----|---------------------------------------------------|-------------|---------------|----|---------|---------|--------|--------|--------|-------|-------|
| 33 | Acetamiprid IM 1 5 metabolite<br>(CAS 125-147)    | 135410-20-7 | Daphnia magna | 26 | 52.280  | 0.000   | 2.066  | -2.605 | 14.106 | 2.221 | 0.959 |
| 34 | Acetochlor WF2061 formulation                     | 34256-82-1  | Daphnia magna | 38 | 29.540  | 0.000   | 3.123  | -3.243 | 13.867 | 2.775 | 1.574 |
| 35 | Acibenzolar-s-methyl                              | 135158-54-2 | Daphnia magna | 19 | 42.850  | 0.000   | 2.195  | -2.277 | 15.710 | 2.008 | 1.860 |
| 36 | Alachlor                                          | 15972-60-8  | Daphnia magna | 38 | 29.540  | 0.000   | 2.987  | -3.243 | 13.867 | 2.859 | 1.544 |
| 37 | Aldicarb                                          | 116-06-3    | Daphnia magna | 26 | 50.690  | 6.093   | 1.470  | -2.091 | 14.680 | 3.423 | 2.666 |
| 38 | Aldoxycarb                                        | 1646-88-4   | Daphnia magna | 28 | 84.830  | 6.093   | 0.151  | -1.904 | 14.868 | 3.889 | 2.900 |
| 39 | Alpha-cypermethrin BAS 310 40<br>I formulation    | 67375-30-8  | Daphnia magna | 47 | 59.320  | 5.969   | 6.178  | -3.777 | 14.184 | 1.507 | 5.813 |
| 40 | Ametryn                                           | 834-12-8    | Daphnia magna | 32 | 62.730  | 0.000   | 1.846  | -2.344 | 14.013 | 2.429 | 0.909 |
| 41 | Amicarbazone                                      | 129909-90-6 | Daphnia magna | 36 | 94.940  | 11.721  | 0.238  | -2.404 | 13.067 | 2.668 | 0.772 |
| 42 | Aminocarb                                         | 2032-59-9   | Daphnia magna | 31 | 41.570  | 6.093   | 1.779  | -2.865 | 12.809 | 2.368 | 4.620 |
| 43 | Aminocyclopyrachlor methyl<br>ester               | 858954-83-3 | Daphnia magna | 25 | 78.100  | 5.969   | 1.376  | -2.344 | 14.505 | 1.998 | 1.029 |
| 44 | Amitraz                                           | 33089-61-1  | Daphnia magna | 45 | 27.960  | 0.000   | 4.872  | -3.851 | 12.283 | 1.624 | 1.939 |
| 45 | Amitrole                                          | 61-82-5     | Daphnia magna | 10 | 67.590  | 0.000   | -1.095 | -0.862 | 13.342 | 2.184 | 1.086 |
| 46 | Anilazine                                         | 101-05-3    | Daphnia magna | 21 | 50.700  | 0.000   | 3.575  | -2.250 | 16.905 | 1.829 | 2.463 |
| 47 | Aspon (Ortho Sod-Cancelled in<br>U.S.)            | 3244-90-4   | Daphnia magna | 51 | 46.150  | 140.999 | 5.924  | -2.510 | 16.677 | 4.805 | 5.758 |
| 48 | Asulam                                            | 3337-71-1   | Daphnia magna | 25 | 98.490  | 6.093   | 0.313  | -2.084 | 14.678 | 2.457 | 0.931 |
| 49 | Atrazine                                          | 1912-24-9   | Daphnia magna | 28 | 62.730  | 0.000   | 1.777  | -2.176 | 14.398 | 2.368 | 1.495 |
| 50 | Azadirachtin                                      | 108168-76-9 | Daphnia magna | 95 | 212.040 | 23.877  | 0.942  | -3.893 | 13.262 | 1.718 | 1.889 |
| 51 | Azinphos-methyl                                   | 86-50-0     | Daphnia magna | 32 | 66.240  | 119.410 | 2.382  | -2.236 | 16.065 | 1.873 | 5.448 |
| 52 | Azoxystrobin                                      | 131860-33-8 | Daphnia magna | 47 | 103.560 | 5.969   | 4.093  | -3.598 | 12.875 | 1.562 | 3.192 |
| 53 | BCDM Hydantoin, 1-bromo-3-<br>chloro-5,5-dimethyl | 16079-88-2  | Daphnia magna | 17 | 40.620  | 6.031   | 1.493  | -1.572 | 21.402 | 2.867 | 2.650 |
| 54 | Bendiocarb                                        | 22781-23-3  | Daphnia magna | 29 | 56.790  | 6.093   | 1.912  | -2.750 | 13.133 | 1.985 | 3.883 |
| 55 | Benfluralin Balan EC formulation                  | 1861-40-1   | Daphnia magna | 39 | 89.520  | 6.176   | 4.148  | -2.557 | 13.876 | 3.103 | 2.186 |
| 56 | Benomyl 50WP formulation                          | 17804-35-2  | Daphnia magna | 39 | 85.250  | 12.124  | 2.572  | -2.928 | 12.961 | 1.989 | 3.329 |
| 57 | Bensulide                                         | 741-58-2    | Daphnia magna | 47 | 64.630  | 0.000   | 4.423  | -2.753 | 16.232 | 2.210 | 2.836 |
| 58 | Bentazon                                          | 50723-80-3  | Daphnia magna | 28 | 66.480  | 10.209  | 1.207  | -2.500 | 14.262 | 2.206 | 0.575 |
| 59 | Benzyl bromoacetate                               | 5437-45-6   | Daphnia magna | 21 | 26.300  | 5.969   | 2.125  | -2.689 | 18.333 | 2.046 | 2.998 |
| 60 | Bethoxazin BTCN metabolite<br>(Canceled in U.S.)  | 163269-30-5 | Daphnia magna | 26 | 41.490  | 0.000   | 2.940  | -2.750 | 15.141 | 1.627 | 2.196 |

|    |                                                                 |             |               |    |        |        |        |        |        |       |        |
|----|-----------------------------------------------------------------|-------------|---------------|----|--------|--------|--------|--------|--------|-------|--------|
| 61 | Bifenazate                                                      | 149877-41-8 | Daphnia magna | 42 | 59.590 | 6.093  | 3.824  | -3.446 | 12.736 | 1.822 | 2.779  |
| 62 | Bifenthrin                                                      | 82657-04-3  | Daphnia magna | 51 | 26.300 | 12.146 | 6.662  | -3.853 | 13.817 | 1.497 | 5.422  |
| 63 | Biobor JF (7.2% as boron)                                       | 2665-13-6   | Daphnia magna | 44 | 55.380 | 14.642 | 1.419  | -2.593 | 13.087 | 1.562 | -0.407 |
| 64 | Bioresmethrin<br>Bis (3-aminopropyl)dodecylamine)               | 28434-01-7  | Daphnia magna | 51 | 39.440 | 5.969  | 5.152  | -4.087 | 12.490 | 1.361 | 5.626  |
| 65 | Lonzabac 12                                                     | 2372-82-9   | Daphnia magna | 62 | 55.280 | 0.000  | 3.907  | -3.765 | 12.296 | 3.352 | 3.613  |
| 66 | Bis (trichloromethyl) sulfone                                   | 3064-70-8   | Daphnia magna | 11 | 34.140 | 0.000  | 3.057  | -0.629 | 27.346 | 4.748 | 3.240  |
| 67 | Bitertanol                                                      | 55179-31-2  | Daphnia magna | 48 | 60.170 | 0.000  | 3.930  | -3.715 | 12.570 | 1.533 | 1.856  |
| 68 | Boscalid                                                        | 188425-85-6 | Daphnia magna | 35 | 43.200 | 0.000  | 4.258  | -3.540 | 14.396 | 1.993 | 1.809  |
| 69 | Brodifacoum                                                     | 56073-10-0  | Daphnia magna | 58 | 50.440 | 5.626  | 7.790  | -4.543 | 14.293 | 1.136 | 2.728  |
| 70 | Bromacil                                                        | 314-40-9    | Daphnia magna | 27 | 54.860 | 5.690  | 1.097  | -2.448 | 17.715 | 2.732 | 0.334  |
| 71 | Bromadiolone                                                    | 28772-56-7  | Daphnia magna | 58 | 70.670 | 5.626  | 7.184  | -4.397 | 14.407 | 1.223 | 3.342  |
| 72 | Bromethalin                                                     | 63333-35-7  | Daphnia magna | 34 | 89.520 | 6.176  | 6.577  | -2.465 | 21.144 | 2.380 | 5.465  |
| 73 | Bromonitrostyrene                                               | 7166-19-0   | Daphnia magna | 18 | 43.140 | 4.606  | 2.657  | -2.390 | 18.500 | 2.195 | 3.978  |
| 74 | Bromoxynil AXF 1240<br>formulation                              | 1689-84-5   | Daphnia magna | 14 | 44.020 | 0.000  | 2.789  | -2.201 | 24.899 | 2.474 | 0.573  |
| 75 | Bromoxynil butyrate                                             | 3861-41-4   | Daphnia magna | 25 | 50.090 | 5.969  | 3.789  | -2.750 | 21.121 | 2.463 | 3.239  |
| 76 | Bromoxynil heptanoate                                           | 56634-95-8  | Daphnia magna | 34 | 50.090 | 5.969  | 4.959  | -3.130 | 19.682 | 2.300 | 4.099  |
| 77 | Bromoxynil octanoate                                            | 1689-99-2   | Daphnia magna | 37 | 50.090 | 5.969  | 5.349  | -3.241 | 19.299 | 2.244 | 3.549  |
| 78 | Bromuconazole (EXP 10064)                                       | 116255-48-2 | Daphnia magna | 32 | 39.940 | 0.000  | 3.664  | -2.809 | 18.249 | 1.744 | 3.647  |
| 79 | Bronopol<br>Butoxypolypropylene glycol<br>(Stabilene repellent) | 52-51-7     | Daphnia magna | 15 | 83.600 | 4.448  | -0.661 | -1.057 | 21.549 | 3.919 | 2.097  |
| 80 |                                                                 | 9003-13-8   | Daphnia magna | 35 | 38.690 | 0.000  | 1.589  | -2.846 | 12.931 | 3.148 | 0.302  |
| 81 | Butralin                                                        | 33629-47-9  | Daphnia magna | 42 | 98.310 | 0.000  | 4.011  | -2.928 | 13.056 | 3.009 | 3.391  |
| 82 | Butylate                                                        | 2008-41-5   | Daphnia magna | 34 | 20.310 | 0.000  | 3.372  | -2.846 | 14.014 | 3.722 | 1.233  |
| 83 | Cadusafos                                                       | 95465-99-9  | Daphnia magna | 38 | 26.300 | 5.773  | 5.194  | -2.605 | 16.481 | 4.293 | 5.172  |
| 84 | Captafol (Cancelled in U.S.)                                    | 2939-80-2   | Daphnia magna | 27 | 37.380 | 0.000  | 3.521  | -2.317 | 18.889 | 2.089 | 2.006  |
| 85 | Captan                                                          | 133-06-2    | Daphnia magna | 24 | 37.380 | 0.000  | 2.914  | -2.250 | 18.283 | 2.087 | 1.554  |
| 86 | Carbaryl                                                        | 63-25-2     | Daphnia magna | 26 | 38.330 | 6.093  | 2.558  | -3.126 | 12.676 | 1.911 | 4.861  |
| 87 | Carbendazim                                                     | 10605-21-7  | Daphnia magna | 23 | 67.010 | 6.093  | 1.259  | -2.448 | 13.008 | 1.805 | 3.240  |
| 88 | Carbofuran                                                      | 1563-66-2   | Daphnia magna | 31 | 47.560 | 6.093  | 2.118  | -3.000 | 12.883 | 1.985 | 3.882  |
| 89 | Carboxin                                                        | 5234-68-4   | Daphnia magna | 29 | 38.330 | 0.000  | 2.620  | -3.000 | 13.888 | 1.784 | 0.445  |

|     |                                                           |             |               |    |         |         |        |        |        |       |        |
|-----|-----------------------------------------------------------|-------------|---------------|----|---------|---------|--------|--------|--------|-------|--------|
| 90  | Chlorantraniliprole 20 SC formulation                     | 500008-45-7 | Daphnia magna | 42 | 81.070  | 6.093   | 4.862  | -3.090 | 16.751 | 1.593 | 4.833  |
| 91  | Chlorethoxyfos                                            | 54593-83-8  | Daphnia magna | 27 | 27.690  | 115.786 | 4.619  | -1.563 | 21.661 | 4.397 | 5.914  |
| 92  | Chlorfenapyr                                              | 122453-73-0 | Daphnia magna | 34 | 37.950  | 6.176   | 5.455  | -2.950 | 17.240 | 2.261 | 4.718  |
| 93  | Chlorflurenol methyl ester                                | 37339-61-0  | Daphnia magna | 30 | 46.530  | 5.969   | 2.729  | -3.354 | 13.874 | 1.945 | 1.564  |
| 94  | Chloroneb                                                 | 2675-77-6   | Daphnia magna | 20 | 18.460  | 0.000   | 3.011  | -2.390 | 16.583 | 2.491 | 1.524  |
| 95  | Chlorophacinone                                           | 3691-35-8   | Daphnia magna | 42 | 51.210  | 0.000   | 4.736  | -4.050 | 13.322 | 1.545 | 2.944  |
| 96  | Chloropicrin                                              | 76-06-2     | Daphnia magna | 7  | 43.140  | 3.916   | 1.591  | -0.401 | 23.482 | 3.541 | 3.137  |
| 97  | Chlorothalonil(Degradate)                                 | 1897-45-6   | Daphnia magna | 14 | 47.580  | 0.000   | 4.044  | -2.176 | 18.994 | 2.824 | 1.010  |
| 98  | Chlorpropham                                              | 101-21-3    | Daphnia magna | 26 | 38.330  | 6.093   | 3.297  | -2.720 | 14.398 | 2.214 | 1.762  |
| 99  | Chlorpyrifos                                              | 2921-88-2   | Daphnia magna | 30 | 40.580  | 126.958 | 5.101  | -2.085 | 18.861 | 2.622 | 6.545  |
| 100 | Chlorpyrifos methyl                                       | 5598-13-0   | Daphnia magna | 24 | 40.580  | 114.116 | 4.321  | -1.750 | 19.718 | 2.594 | 5.463  |
| 101 | Chlorsulfuron                                             | 64902-72-3  | Daphnia magna | 35 | 114.200 | 16.240  | 0.101  | -2.360 | 15.030 | 2.120 | -0.015 |
| 102 | Chlorthal dimethyl (DCPA or Dacthal)                      | 1861-32-1   | Daphnia magna | 24 | 52.600  | 11.939  | 3.873  | -2.317 | 18.107 | 2.949 | 1.134  |
| 103 | Chromic acid                                              | 7738-94-5   | Daphnia magna | 7  | 80.260  | 31.045  | -1.354 | 0.000  | 23.198 | 3.024 | 2.191  |
| 104 | Cinnamaldehyde                                            | 104-55-2    | Daphnia magna | 18 | 17.070  | 0.000   | 1.899  | -2.990 | 12.410 | 2.017 | 1.273  |
| 105 | Clethodim                                                 | 99129-21-2  | Daphnia magna | 49 | 58.890  | 0.000   | 4.844  | -3.344 | 14.509 | 2.502 | 1.251  |
| 106 | Clomazone                                                 | 81777-89-1  | Daphnia magna | 30 | 29.540  | 0.000   | 2.640  | -3.000 | 14.099 | 1.899 | 1.664  |
| 107 | Coumaphos                                                 | 56-72-4     | Daphnia magna | 39 | 57.900  | 138.892 | 4.814  | -2.838 | 15.757 | 1.961 | 6.276  |
| 108 | Cyanamide (Alzodef)                                       | 420-04-2    | Daphnia magna | 5  | 49.810  | 0.000   | -0.574 | -0.528 | 13.342 | 1.633 | 0.798  |
| 109 | Cyanazine                                                 | 21725-46-2  | Daphnia magna | 29 | 86.520  | 0.000   | 1.671  | -2.250 | 14.225 | 2.469 | 0.758  |
| 110 | Cyantraniliprole WG<br>Cyazofamid (400 SC<br>formulation) | 736994-63-1 | Daphnia magna | 43 | 112.700 | 0.000   | 3.475  | -3.183 | 15.848 | 1.709 | 4.910  |
| 111 | Cycloate                                                  | 120116-88-3 | Daphnia magna | 34 | 78.990  | 10.209  | 2.038  | -2.719 | 14.842 | 2.231 | 3.313  |
| 112 | Cyflufenamid 149-F1 metabolite                            | 1134-23-2   | Daphnia magna | 35 | 20.310  | 0.000   | 3.514  | -2.991 | 13.871 | 2.415 | 0.953  |
| 113 | Cyfluthrin (Tempo 2EC<br>Formulation)                     | 180409-60-3 | Daphnia magna | 46 | 50.690  | 6.176   | 4.431  | -3.350 | 13.628 | 1.679 | 1.457  |
| 114 | Cyhalothrin                                               | 68359-37-5  | Daphnia magna | 47 | 59.320  | 5.969   | 6.317  | -3.685 | 14.350 | 1.544 | 7.240  |
| 115 | Cyhexatin                                                 | 68085-85-8  | Daphnia magna | 50 | 59.320  | 12.146  | 6.544  | -3.676 | 13.894 | 1.521 | 6.073  |
| 116 | Cymoxanil                                                 | 13121-70-5  | Daphnia magna | 54 | 20.230  | 130.349 | 5.927  | -3.890 | 17.545 | 1.791 | 6.355  |
| 117 | Cypermethrin Beta                                         | 57966-95-7  | Daphnia magna | 24 | 103.580 | 6.031   | -0.642 | -1.904 | 13.436 | 3.829 | 2.394  |
| 118 |                                                           | 52315-07-8  | Daphnia magna | 47 | 59.320  | 5.969   | 6.178  | -3.777 | 14.184 | 1.507 | 5.996  |

|     |                                                                  |             |               |    |        |         |        |        |        |       |        |
|-----|------------------------------------------------------------------|-------------|---------------|----|--------|---------|--------|--------|--------|-------|--------|
| 119 | Cyphenothrin                                                     | 39515-40-7  | Daphnia magna | 53 | 59.320 | 5.969   | 5.825  | -4.121 | 12.510 | 1.507 | 5.941  |
| 120 | Cyproconazole                                                    | 94361-06-5  | Daphnia magna | 38 | 50.940 | 0.000   | 2.865  | -3.241 | 13.682 | 1.705 | 1.050  |
| 121 | Cyprodinil                                                       | 121552-61-2 | Daphnia magna | 32 | 37.810 | 0.000   | 3.406  | -3.366 | 12.363 | 1.503 | 3.848  |
| 122 | Daminozide                                                       | 1596-84-5   | Daphnia magna | 23 | 69.640 | 5.969   | -0.556 | -1.887 | 13.462 | 3.293 | 0.211  |
| 123 | Dazomet                                                          | 533-74-4    | Daphnia magna | 19 | 6.480  | 0.000   | 0.797  | -1.761 | 16.911 | 2.346 | 2.692  |
| 124 | DBDMH Glybrom formulation                                        | 77-48-5     | Daphnia magna | 17 | 40.620 | 6.031   | 1.649  | -1.572 | 25.443 | 2.867 | 2.532  |
| 125 | DBNPA                                                            | 10222-01-2  | Daphnia magna | 10 | 66.880 | 0.000   | 0.481  | -1.125 | 29.982 | 3.708 | 2.449  |
| 126 | DCDMH (Dantochlor Formulation)                                   | 118-52-5    | Daphnia magna | 17 | 40.620 | 6.031   | 1.337  | -1.572 | 17.361 | 2.867 | 2.622  |
| 127 | DDT (Cancelled in U.S.)                                          | 50-29-3     | Daphnia magna | 28 | 0.000  | 0.000   | 6.496  | -3.130 | 18.180 | 2.037 | 4.878  |
| 128 | Decanol (Alfol 810 alcohol)                                      | 112-30-1    | Daphnia magna | 33 | 20.230 | 0.000   | 3.119  | -3.145 | 12.374 | 2.691 | 1.386  |
| 129 | Deltamethrin                                                     | 52918-63-5  | Daphnia magna | 47 | 59.320 | 5.969   | 6.490  | -3.777 | 17.359 | 1.507 | 6.662  |
| 130 | Desmedipham                                                      | 13684-56-5  | Daphnia magna | 38 | 76.660 | 12.186  | 3.866  | -3.243 | 12.918 | 1.673 | 2.203  |
| 131 | Diazinon                                                         | 333-41-5    | Daphnia magna | 41 | 53.470 | 120.148 | 3.968  | -2.683 | 14.904 | 2.617 | 5.766  |
| 132 | Diazolidinylurea (Integra 22)                                    | 78491-02-8  | Daphnia magna | 19 | 70.390 | 6.031   | -1.568 | -1.409 | 13.341 | 2.113 | 0.351  |
| 133 | Dibromodicyanobutane                                             | 35691-65-7  | Daphnia magna | 16 | 47.580 | 0.000   | 2.546  | -1.993 | 25.989 | 3.971 | 2.082  |
| 134 | Dicamba                                                          | 1918-00-9   | Daphnia magna | 19 | 46.530 | 5.969   | 2.700  | -2.277 | 16.538 | 2.709 | 0.300  |
| 135 | Dichlobenil                                                      | 1194-65-6   | Daphnia magna | 13 | 23.790 | 0.000   | 2.865  | -2.325 | 16.899 | 2.450 | 1.443  |
| 136 | Dichlormid                                                       | 37764-25-3  | Daphnia magna | 23 | 20.310 | 0.000   | 1.991  | -2.390 | 16.417 | 3.894 | 0.169  |
| 137 | Dichlorprop (2,4-DP) Weedone formulation                         | 120-36-5    | Daphnia magna | 22 | 46.530 | 5.969   | 2.845  | -2.448 | 16.214 | 2.371 | 4.647  |
| 138 | Dichlorprop P (2,4-DP-p) Dichlorvos in Muscalure Z-9 formulation | 15165-67-0  | Daphnia magna | 22 | 46.530 | 5.969   | 2.845  | -2.448 | 16.214 | 2.371 | -0.375 |
| 139 | Diclofop-methyl                                                  | 62-73-7     | Daphnia magna | 18 | 44.760 | 7.823   | 2.680  | -1.258 | 19.447 | 3.686 | 2.311  |
| 140 | Dicloran (DCNA)                                                  | 51338-27-3  | Daphnia magna | 36 | 44.760 | 5.969   | 4.726  | -3.243 | 14.867 | 1.687 | 3.171  |
| 141 | Diclosulam                                                       | 99-30-9     | Daphnia magna | 16 | 69.160 | 0.000   | 2.484  | -1.792 | 16.915 | 2.533 | 2.000  |
| 142 | Dicrotophos                                                      | 145701-21-9 | Daphnia magna | 36 | 86.450 | 6.010   | 2.943  | -2.601 | 15.766 | 1.665 | 0.750  |
| 143 | Dienochlor                                                       | 141-66-2    | Daphnia magna | 31 | 65.070 | 7.823   | 1.396  | -2.084 | 14.738 | 4.068 | 4.271  |
| 144 | Diethyl toluamide (DEET)                                         | 2227-17-0   | Daphnia magna | 20 | 0.000  | 0.000   | 7.726  | -2.161 | 23.732 | 2.532 | 2.597  |
| 145 | Difenoconazole                                                   | 134-62-3    | Daphnia magna | 31 | 20.310 | 0.000   | 2.477  | -3.263 | 12.438 | 2.449 | 0.407  |
| 146 | Difethialone                                                     | 119446-68-3 | Daphnia magna | 44 | 58.400 | 0.000   | 4.666  | -3.346 | 14.412 | 1.351 | 2.722  |
| 147 | Diflubenzuron                                                    | 104653-34-1 | Daphnia magna | 58 | 37.300 | 0.000   | 8.259  | -4.543 | 14.752 | 1.136 | 5.089  |
| 148 |                                                                  | 35367-38-5  | Daphnia magna | 30 | 58.200 | 6.031   | 3.580  | -2.928 | 14.363 | 1.767 | 5.316  |

|     |                                                  |             |               |    |         |         |        |        |        |       |       |
|-----|--------------------------------------------------|-------------|---------------|----|---------|---------|--------|--------|--------|-------|-------|
| 149 | Diiodomethyl p-tolyl sulfone<br>(Amical 48)      | 20018-09-1  | Daphnia magna | 21 | 34.140  | 0.000   | 2.922  | -2.277 | 31.843 | 2.524 | 3.774 |
| 150 | Dimethenamid                                     | 87674-68-8  | Daphnia magna | 35 | 29.540  | 0.000   | 2.972  | -2.885 | 15.156 | 2.807 | 1.236 |
| 151 | Dimethepin (Harvade 25F<br>formulation)          | 55290-64-7  | Daphnia magna | 22 | 68.280  | 0.000   | 0.081  | -1.792 | 16.683 | 2.799 | 1.503 |
| 152 | Dimethyl disulfide                               | 624-92-0    | Daphnia magna | 10 | 0.000   | 0.000   | 1.627  | -1.000 | 22.039 | 1.975 | 1.767 |
| 153 | Dinitramine                                      | 29091-05-2  | Daphnia magna | 35 | 115.540 | 11.864  | 2.950  | -2.230 | 14.052 | 3.268 | 2.394 |
| 154 | Dinocap                                          | 39300-45-3  | Daphnia magna | 50 | 112.580 | 11.657  | 5.058  | -3.254 | 13.085 | 2.895 | 4.938 |
| 155 | Diphacinone                                      | 82-66-6     | Daphnia magna | 42 | 51.210  | 0.000   | 4.083  | -4.158 | 12.471 | 1.551 | 2.277 |
| 156 | Diphenamid                                       | 957-51-7    | Daphnia magna | 35 | 20.310  | 0.000   | 2.907  | -3.707 | 12.343 | 2.045 | 0.616 |
| 157 | Diphenylamine                                    | 122-39-4    | Daphnia magna | 24 | 12.030  | 0.000   | 3.430  | -3.416 | 12.165 | 1.687 | 2.149 |
| 158 | Dipropyl isocinchomeronate<br>MGK 326 repellent  | 136-45-8    | Daphnia magna | 35 | 65.490  | 11.939  | 2.215  | -3.012 | 13.008 | 2.227 | 1.145 |
| 159 | Disulfoton                                       | 298-04-4    | Daphnia magna | 33 | 18.460  | 0.000   | 4.421  | -2.176 | 18.233 | 3.303 | 4.324 |
| 160 | Dithiopyr Dimension formulation                  | 97886-45-8  | Daphnia magna | 41 | 47.030  | 6.176   | 5.243  | -2.786 | 15.412 | 3.432 | 1.888 |
| 161 | Diuron Karmex DF Formulation                     | 330-54-1    | Daphnia magna | 24 | 32.340  | 6.031   | 3.087  | -2.448 | 15.930 | 2.326 | 1.443 |
| 162 | D-Phenothrin (Sumithrin)                         | 26002-80-2  | Daphnia magna | 52 | 35.530  | 5.969   | 5.761  | -4.158 | 12.471 | 1.396 | 4.901 |
| 163 | DTEA                                             | 36362-09-1  | Daphnia magna | 41 | 26.020  | 0.000   | 3.819  | -3.263 | 13.586 | 2.785 | 3.781 |
| 164 | d-trans-Allethrin                                | 584-79-2    | Daphnia magna | 48 | 43.370  | 5.969   | 4.002  | -3.851 | 12.555 | 1.914 | 4.531 |
| 165 | Econea (Chlorfenapyr) CL 322,<br>250 degradate   | 122454-29-9 | Daphnia magna | 24 | 39.580  | 6.176   | 4.506  | -2.683 | 18.131 | 2.076 | 2.698 |
| 166 | Endosulfan                                       | 115-29-7    | Daphnia magna | 26 | 38.360  | 143.458 | 4.288  | -2.012 | 21.099 | 2.109 | 3.389 |
| 167 | Endosulfan sulfate metabolite(PC<br>Code 079404) | 1031-07-8   | Daphnia magna | 26 | 52.600  | 10.399  | 3.356  | -1.945 | 20.844 | 2.094 | 3.149 |
| 168 | Endothall                                        | 145-73-3    | Daphnia magna | 23 | 83.830  | 11.939  | -0.051 | -2.277 | 13.545 | 2.149 | 0.758 |
| 169 | Endrin (Cancelled in U.S.)                       | 72-20-8     | Daphnia magna | 27 | 12.530  | 0.000   | 4.481  | -2.683 | 19.624 | 1.758 | 4.958 |
| 170 | Esfenvalerate                                    | 66230-04-4  | Daphnia magna | 52 | 59.320  | 5.969   | 6.680  | -4.089 | 13.258 | 1.539 | 6.447 |
| 171 | Ethalfuralin Sonalan EC<br>formulation           | 55283-68-6  | Daphnia magna | 37 | 89.520  | 6.176   | 3.924  | -2.557 | 13.876 | 3.155 | 4.265 |
| 172 | Ethephon                                         | 16672-87-0  | Daphnia magna | 13 | 57.530  | 7.596   | 0.403  | -0.802 | 19.778 | 3.154 | 0.659 |
| 173 | Ethion                                           | 563-12-2    | Daphnia magna | 43 | 36.920  | 136.803 | 5.771  | -2.012 | 19.069 | 4.271 | 6.837 |
| 174 | Ethofenprox                                      | 80844-07-1  | Daphnia magna | 56 | 27.690  | 0.000   | 6.372  | -4.292 | 12.438 | 1.339 | 5.820 |
| 175 | Ethofumesate                                     | 26225-79-6  | Daphnia magna | 37 | 61.830  | 10.118  | 2.058  | -2.906 | 14.116 | 2.023 | 0.651 |
| 176 | Ethoprop                                         | 13194-48-4  | Daphnia magna | 32 | 26.300  | 5.773   | 4.417  | -2.277 | 17.169 | 3.835 | 3.753 |

|     |                                                         |             |               |     |         |         |        |        |        |       |        |
|-----|---------------------------------------------------------|-------------|---------------|-----|---------|---------|--------|--------|--------|-------|--------|
| 177 | Ethoxyquin<br>Ethyl N,N-dipropylthiocarbamate<br>(EPTC) | 91-53-2     | Daphnia magna | 35  | 21.260  | 0.000   | 3.693  | -3.500 | 12.385 | 1.983 | 2.036  |
| 178 | Ethylenethiourea                                        | 759-94-4    | Daphnia magna | 31  | 20.310  | 0.000   | 2.982  | -2.689 | 14.181 | 3.721 | 1.128  |
| 179 | Etoxazole                                               | 96-45-7     | Daphnia magna | 12  | 24.060  | 0.000   | -0.536 | -1.292 | 16.019 | 2.184 | 0.580  |
| 180 | Etridiazole metabolite(T-03)                            | 153233-91-1 | Daphnia magna | 49  | 30.820  | 0.000   | 5.179  | -3.797 | 12.932 | 1.631 | 4.704  |
| 181 | Famoxadone                                              | 2593-15-9   | Daphnia magna | 17  | 35.010  | 0.000   | 2.764  | -1.494 | 20.208 | 2.352 | 2.352  |
| 182 | Farnesol                                                | 131807-57-3 | Daphnia magna | 46  | 67.870  | 6.093   | 4.700  | -3.777 | 12.723 | 1.294 | 4.501  |
| 183 | Fenamidone(RPA413255 s-<br>enantiomer)                  | 4602-84-0   | Daphnia magna | 42  | 20.230  | 0.000   | 4.398  | -3.750 | 12.260 | 3.324 | 2.005  |
| 184 | Fenamiphos Nemacur 3<br>formulation                     | 161326-34-7 | Daphnia magna | 39  | 44.700  | 0.000   | 3.490  | -3.446 | 13.376 | 1.688 | 1.507  |
| 185 | Fenarimol                                               | 22224-92-6  | Daphnia magna | 41  | 47.560  | 7.746   | 4.238  | -2.906 | 14.799 | 2.550 | 5.368  |
| 186 | Fenazaquin                                              | 60168-88-9  | Daphnia magna | 34  | 46.010  | 0.000   | 4.068  | -3.446 | 14.505 | 1.827 | 1.688  |
| 187 | Fenbutatin oxide                                        | 120928-09-8 | Daphnia magna | 45  | 35.010  | 0.000   | 4.549  | -3.934 | 12.358 | 1.366 | 4.738  |
| 188 | Fenhexamid                                              | 114369-43-6 | Daphnia magna | 41  | 54.500  | 0.000   | 4.026  | -3.630 | 13.320 | 1.623 | 2.166  |
| 189 | Fenitrothion                                            | 13356-08-6  | Daphnia magna | 141 | 9.230   | 396.560 | 16.761 | -5.693 | 15.462 | 1.578 | 4.531  |
| 190 | Fenoxaprop-ethyl                                        | 126833-17-8 | Daphnia magna | 36  | 49.330  | 0.000   | 4.608  | -3.130 | 15.003 | 1.925 | 0.459  |
| 191 | Fenoxaprop-P metabolite                                 | 122-14-5    | Daphnia magna | 30  | 70.830  | 104.345 | 3.182  | -2.164 | 15.597 | 2.497 | 5.081  |
| 192 | Fenoxycarb                                              | 66441-23-4  | Daphnia magna | 41  | 70.790  | 12.046  | 4.604  | -3.344 | 13.826 | 1.356 | 2.056  |
| 193 | Fenpropathrin                                           | 71283-80-2  | Daphnia magna | 41  | 70.790  | 12.046  | 4.604  | -3.344 | 13.826 | 1.356 | 0.458  |
| 194 | Fenpropimorph                                           | 72490-01-8  | Daphnia magna | 41  | 56.790  | 6.093   | 3.604  | -3.446 | 12.827 | 1.495 | 2.877  |
| 195 | Fenpyrazamine                                           | 39515-41-8  | Daphnia magna | 49  | 59.320  | 5.969   | 5.269  | -3.977 | 12.548 | 1.521 | 5.819  |
| 196 | Fenpyroximate FujiMite 5EC                              | 67564-91-4  | Daphnia magna | 55  | 12.470  | 0.000   | 4.272  | -4.054 | 12.283 | 1.706 | 2.106  |
| 197 | Fenthion                                                | 473798-59-3 | Daphnia magna | 44  | 70.020  | 5.239   | 3.676  | -3.344 | 13.490 | 2.205 | 1.780  |
| 198 | Fenvalerate                                             | 134098-61-6 | Daphnia magna | 58  | 74.940  | 5.969   | 5.027  | -3.836 | 12.719 | 1.340 | 5.421  |
| 199 | Fipronil MB 46136 metabolite                            | 55-38-9     | Daphnia magna | 32  | 27.690  | 106.534 | 3.996  | -2.500 | 16.451 | 2.457 | 4.729  |
| 200 | Flazasulfuron DTPU Degradate                            | 51630-58-1  | Daphnia magna | 52  | 59.320  | 5.969   | 6.680  | -4.089 | 13.258 | 1.539 | 6.924  |
| 201 | Fluazifop-butyl (PP009)                                 | 120068-37-3 | Daphnia magna | 31  | 87.530  | 11.685  | 4.877  | -2.169 | 16.658 | 2.209 | 4.178  |
| 202 | Fluazifop-p-butyl RS 14:1<br>methanol prepartion        | 104040-78-0 | Daphnia magna | 39  | 123.430 | 12.207  | -0.236 | -2.289 | 14.638 | 2.164 | 0.390  |
| 203 | Fluazifop-p-butyl RS 14:1<br>methanol prepartion        | 69806-50-4  | Daphnia magna | 47  | 57.650  | 12.146  | 5.003  | -3.346 | 13.452 | 1.614 | 1.804  |
| 204 | Fluazifop-p-butyl RS 14:1<br>methanol prepartion        | 79241-46-6  | Daphnia magna | 47  | 57.650  | 12.146  | 5.003  | -3.346 | 13.452 | 1.614 | -0.032 |
| 205 | Fluazinam                                               | 79622-59-6  | Daphnia magna | 33  | 111.200 | 23.727  | 5.986  | -2.178 | 15.899 | 2.240 | 3.412  |



|     |                                                   |             |               |    |         |        |        |        |        |       |       |
|-----|---------------------------------------------------|-------------|---------------|----|---------|--------|--------|--------|--------|-------|-------|
| 206 | Flubendiamide WG24<br>formulation                 | 272451-65-7 | Daphnia magna | 60 | 84.500  | 18.021 | 5.643  | -3.176 | 17.374 | 1.845 | 5.482 |
| 207 | Fluchloralin (uses canceled in<br>U.S.)           | 33245-39-5  | Daphnia magna | 36 | 89.520  | 6.176  | 3.977  | -2.360 | 14.895 | 3.148 | 2.803 |
| 208 | Flucythrinate                                     | 70124-77-5  | Daphnia magna | 56 | 68.550  | 12.581 | 6.628  | -3.974 | 12.978 | 1.521 | 4.736 |
| 209 | Fludioxonil(Maxim 4FS)                            | 131341-86-1 | Daphnia magna | 24 | 58.040  | 6.295  | 2.393  | -2.780 | 13.452 | 1.752 | 2.441 |
| 210 | Flumetsulam                                       | 98967-40-9  | Daphnia magna | 31 | 89.250  | 0.000  | 1.512  | -2.432 | 14.374 | 1.628 | 0.107 |
| 211 | Flumioxazin                                       | 103361-09-7 | Daphnia magna | 41 | 66.920  | 0.000  | 1.928  | -3.435 | 13.047 | 1.543 | 1.809 |
| 212 | Fluometuron                                       | 2164-17-2   | Daphnia magna | 27 | 32.340  | 12.207 | 2.799  | -2.500 | 13.820 | 2.449 | 1.370 |
| 213 | Fluopicolide degradate (2,6-<br>dichlorobenamide) | 239110-15-7 | Daphnia magna | 31 | 41.990  | 6.176  | 4.991  | -2.753 | 16.327 | 1.815 | 0.319 |
| 214 | Fluoxastrobin                                     | 361377-29-9 | Daphnia magna | 48 | 96.650  | 0.000  | 4.565  | -3.281 | 13.835 | 1.383 | 2.980 |
| 215 | Fluridone                                         | 59756-60-4  | Daphnia magna | 38 | 22.000  | 6.176  | 4.738  | -3.630 | 13.134 | 1.689 | 2.040 |
| 216 | Flurprimidol                                      | 56425-91-3  | Daphnia magna | 37 | 55.240  | 6.362  | 3.267  | -3.041 | 13.508 | 1.989 | 1.482 |
| 217 | Flutriafol 125 g/L SC formulation                 | 76674-21-0  | Daphnia magna | 35 | 50.940  | 0.000  | 2.492  | -3.243 | 13.100 | 1.762 | 1.631 |
| 218 | Fluvalinate                                       | 69409-94-5  | Daphnia magna | 57 | 71.350  | 12.146 | 7.396  | -3.810 | 13.736 | 1.536 | 6.099 |
| 219 | Fluxapyroxad                                      | 907204-31-3 | Daphnia magna | 39 | 46.920  | 0.000  | 4.694  | -3.170 | 13.674 | 1.649 | 1.750 |
| 220 | Folpet                                            | 133-07-3    | Daphnia magna | 20 | 37.380  | 0.000  | 3.259  | -2.250 | 18.283 | 2.087 | 2.735 |
| 221 | Fonofos                                           | 944-22-9    | Daphnia magna | 30 | 9.230   | 95.891 | 4.528  | -2.720 | 16.515 | 2.369 | 5.082 |
| 222 | Forchlorfenuron                                   | 68157-60-8  | Daphnia magna | 27 | 54.020  | 6.031  | 3.379  | -2.885 | 13.977 | 1.665 | 1.670 |
| 223 | Fosthiazate                                       | 98886-44-3  | Daphnia magna | 34 | 46.610  | 6.721  | 3.832  | -2.250 | 16.576 | 2.695 | 3.037 |
| 224 | Furfural                                          | 98-01-1     | Daphnia magna | 11 | 30.210  | 0.000  | 1.092  | -2.005 | 13.150 | 2.140 | 0.673 |
| 225 | Gamma cyhalothrin                                 | 76703-62-3  | Daphnia magna | 50 | 59.320  | 12.146 | 6.544  | -3.676 | 13.894 | 1.521 | 7.000 |
| 226 | Glutaraldehyde                                    | 111-30-8    | Daphnia magna | 15 | 34.140  | 0.000  | 0.554  | -2.005 | 13.150 | 2.447 | 2.125 |
| 227 | Glyphosate N-<br>(phosphonomethyl) glycine        | 1071-83-6   | Daphnia magna | 18 | 106.860 | 13.565 | -1.204 | -0.997 | 16.101 | 3.205 | 0.101 |
| 228 | Grotan                                            | 4719-04-4   | Daphnia magna | 36 | 70.410  | 0.000  | -2.245 | -2.344 | 13.208 | 2.400 | 0.924 |
| 229 | Halofenozide                                      | 112226-61-6 | Daphnia magna | 42 | 49.410  | 0.000  | 3.926  | -3.540 | 13.551 | 1.972 | 1.963 |
| 230 | Haloxypop acid<br>Hexaconazole JF 9445            | 69806-34-4  | Daphnia magna | 35 | 68.650  | 12.146 | 4.398  | -2.866 | 14.609 | 1.724 | 0.573 |
| 231 | formulation - test 1                              | 79983-71-4  | Daphnia magna | 37 | 50.940  | 0.000  | 3.663  | -3.025 | 14.854 | 2.034 | 2.218 |
| 232 | Hexadecadienol acetate                            | 53042-79-8  | Daphnia magna | 52 | 26.300  | 5.969  | 5.930  | -3.890 | 12.410 | 2.924 | 2.603 |
| 233 | Hexaflumuron                                      | 86479-06-3  | Daphnia magna | 37 | 67.430  | 18.565 | 5.470  | -2.680 | 15.623 | 1.863 | 6.619 |

|     |                                                                    |             |               |    |         |         |        |        |        |       |        |
|-----|--------------------------------------------------------------------|-------------|---------------|----|---------|---------|--------|--------|--------|-------|--------|
| 234 | Hexazinone                                                         | 51235-04-2  | Daphnia magna | 38 | 60.130  | 11.379  | 0.513  | -2.780 | 12.898 | 2.071 | 0.473  |
| 235 | Hexythiazox PT-1-9                                                 | 78587-05-0  | Daphnia magna | 44 | 49.410  | 6.031   | 4.981  | -3.344 | 14.423 | 1.563 | 1.652  |
| 236 | Hydramethylnon                                                     | 67485-29-4  | Daphnia magna | 59 | 48.780  | 12.353  | 6.382  | -3.664 | 13.437 | 1.446 | 2.637  |
| 237 | Hymexazol                                                          | 10004-44-1  | Daphnia magna | 12 | 46.000  | 0.000   | -0.206 | -1.604 | 13.436 | 2.257 | 0.507  |
| 238 | Imazalil                                                           | 35554-44-0  | Daphnia magna | 33 | 27.050  | 0.000   | 4.134  | -3.130 | 14.899 | 1.905 | 1.973  |
| 239 | Imazamethabenz                                                     | 81405-85-8  | Daphnia magna | 41 | 67.760  | 5.969   | 2.073  | -3.347 | 12.771 | 2.143 | 0.117  |
| 240 | Imazaquin                                                          | 81335-37-7  | Daphnia magna | 40 | 91.650  | 5.969   | 2.224  | -3.344 | 12.792 | 1.766 | 0.046  |
| 241 | Imazosulfuron                                                      | 122548-33-8 | Daphnia magna | 41 | 110.800 | 6.031   | 0.677  | -2.465 | 14.804 | 1.702 | 1.111  |
| 242 | Imidacloprid                                                       | 138261-41-3 | Daphnia magna | 27 | 85.400  | 0.000   | 0.383  | -2.164 | 14.446 | 1.769 | 0.477  |
| 243 | Imiprothrin (Pralle)<br>Indaziflam SC 200 G dual<br>isomer mixture | 72963-72-5  | Daphnia magna | 45 | 66.920  | 12.000  | 1.623  | -3.344 | 12.878 | 1.839 | 3.795  |
| 244 |                                                                    | 950782-86-2 | Daphnia magna | 42 | 76.720  | 0.000   | 3.138  | -3.243 | 12.782 | 1.633 | 0.189  |
| 245 | Indole-3-butyric acid                                              | 133-32-4    | Daphnia magna | 28 | 53.090  | 5.969   | 2.093  | -3.126 | 12.676 | 1.730 | 0.552  |
| 246 | Indoxacarb IN-MP819                                                | 173584-44-6 | Daphnia magna | 53 | 106.970 | 24.456  | 4.093  | -3.159 | 14.186 | 1.478 | 3.916  |
| 247 | Inert Surfadone(LP100)                                             | 2687-94-7   | Daphnia magna | 17 | 33.020  | 0.000   | 1.706  | -2.516 | 13.190 | 2.374 | 1.299  |
| 248 | Ipconazole                                                         | 125225-28-7 | Daphnia magna | 47 | 50.940  | 0.000   | 3.588  | -3.540 | 13.464 | 1.664 | 2.293  |
| 249 | Iprodione                                                          | 36734-19-7  | Daphnia magna | 34 | 69.720  | 12.062  | 2.880  | -2.719 | 15.098 | 2.034 | 3.139  |
| 250 | Irgarol<br>Isazophos methyl Triumph 4E<br>formulation              | 28159-98-0  | Daphnia magna | 36 | 62.730  | 0.000   | 2.378  | -2.645 | 13.778 | 1.866 | 1.679  |
| 251 |                                                                    | 42509-83-1  | Daphnia magna | 30 | 58.400  | 104.733 | 2.791  | -1.750 | 17.037 | 2.525 | 5.113  |
| 252 | Isofenphos metabolite                                              | 25311-71-1  | Daphnia magna | 47 | 56.790  | 137.903 | 4.273  | -3.041 | 14.600 | 2.751 | 5.334  |
| 253 | Isomate C Sex Pheromone                                            | 33956-49-9  | Daphnia magna | 35 | 20.230  | 0.000   | 3.452  | -3.416 | 12.318 | 2.758 | 1.814  |
| 254 | Isopropalin                                                        | 33820-53-0  | Daphnia magna | 45 | 89.520  | 0.000   | 4.253  | -3.041 | 13.008 | 3.082 | 3.061  |
| 255 | Kepone (Cancelled in U.S.)                                         | 143-50-0    | Daphnia magna | 21 | 17.070  | 0.000   | 4.823  | -2.092 | 23.364 | 2.037 | 3.276  |
| 256 | Kinoprene                                                          | 42588-37-4  | Daphnia magna | 48 | 26.300  | 5.969   | 4.518  | -3.890 | 12.410 | 3.516 | 3.442  |
| 257 | Kresoxim methyl                                                    | 143390-89-0 | Daphnia magna | 42 | 57.120  | 5.969   | 2.611  | -3.540 | 12.791 | 1.975 | 2.975  |
| 258 | Lactofen                                                           | 77501-63-4  | Daphnia magna | 46 | 104.970 | 18.115  | 5.168  | -3.036 | 14.408 | 1.966 | 2.363  |
| 259 | Lambda-Cyhalothrin                                                 | 91465-08-6  | Daphnia magna | 50 | 59.320  | 12.146  | 6.544  | -3.676 | 13.894 | 1.521 | 7.051  |
| 260 | Limonene                                                           | 138-86-3    | Daphnia magna | 26 | 0.000   | 0.000   | 3.309  | -3.322 | 12.011 | 2.260 | 0.543  |
| 261 | Linalool                                                           | 78-70-6     | Daphnia magna | 29 | 20.230  | 0.000   | 2.670  | -3.145 | 12.374 | 3.376 | 0.624  |
| 262 | Lindane                                                            | 58-89-9     | Daphnia magna | 18 | 0.000   | 0.000   | 3.644  | -1.792 | 23.732 | 2.760 | 1.664  |
| 263 | Linuron                                                            | 330-55-2    | Daphnia magna | 25 | 41.570  | 6.031   | 3.019  | -2.344 | 15.934 | 2.330 | 3.317  |
| 264 | L-Lactic acid                                                      | 79-33-4     | Daphnia magna | 12 | 57.530  | 5.969   | -0.548 | -1.292 | 14.005 | 2.993 | -0.920 |

|     |                                               |             |               |    |         |         |        |        |        |       |       |
|-----|-----------------------------------------------|-------------|---------------|----|---------|---------|--------|--------|--------|-------|-------|
| 265 | Malathion                                     | 121-75-5    | Daphnia magna | 39 | 71.060  | 122.751 | 2.505  | -2.236 | 16.380 | 4.654 | 5.519 |
| 266 | Maleic hydrazide                              | 123-33-1    | Daphnia magna | 12 | 65.720  | 0.000   | -1.901 | -1.500 | 13.507 | 2.192 | 0.018 |
| 267 | Mandipropamid                                 | 374726-62-2 | Daphnia magna | 51 | 56.790  | 0.000   | 3.410  | -3.853 | 13.438 | 1.750 | 1.764 |
| 268 | MCPA 2-ethylhexyl ester                       | 29450-45-1  | Daphnia magna | 46 | 35.530  | 5.969   | 4.787  | -3.556 | 13.697 | 2.164 | 3.048 |
| 269 | MCPA isooctyl ester (Rhonox formula)          | 26544-20-7  | Daphnia magna | 46 | 35.530  | 5.969   | 4.787  | -3.556 | 13.697 | 1.994 | 3.033 |
| 270 | Mefenpyr diethyl                              | 135590-91-9 | Daphnia magna | 42 | 68.200  | 11.939  | 3.444  | -3.057 | 14.796 | 2.199 | 1.824 |
| 271 | Mesotrione(MNBA metabolite)                   | 104206-82-8 | Daphnia magna | 36 | 128.490 | 0.000   | 1.119  | -2.753 | 14.184 | 2.134 | 0.404 |
| 272 | Metaflumizone 320 I formulation               | 139968-49-3 | Daphnia magna | 52 | 86.510  | 18.570  | 6.244  | -3.447 | 13.619 | 1.505 | 2.296 |
| 273 | Metalaxyl Ridomil 2E-G                        | 57837-19-1  | Daphnia magna | 41 | 55.840  | 5.969   | 1.844  | -3.241 | 12.908 | 2.950 | 1.349 |
| 274 | Metconazole (cis/trans isomers)               | 125116-23-6 | Daphnia magna | 44 | 50.940  | 0.000   | 3.342  | -3.446 | 13.530 | 1.656 | 1.734 |
| 275 | Methamidophos                                 | 10265-92-6  | Daphnia magna | 15 | 52.320  | 6.721   | 1.063  | -0.802 | 19.010 | 3.360 | 3.735 |
| 276 | Methidathion                                  | 950-37-8    | Daphnia magna | 28 | 62.580  | 106.719 | 1.904  | -1.500 | 18.203 | 2.377 | 4.674 |
| 277 | Methiocarb                                    | 2032-65-7   | Daphnia magna | 30 | 38.330  | 6.093   | 2.744  | -2.865 | 14.013 | 2.451 | 4.074 |
| 278 | Methomyl                                      | 16752-77-5  | Daphnia magna | 20 | 50.690  | 6.093   | 1.039  | -1.661 | 15.213 | 3.168 | 4.266 |
| 279 | Methoprene                                    | 40596-69-8  | Daphnia magna | 56 | 35.530  | 5.969   | 5.062  | -3.851 | 12.555 | 3.681 | 2.543 |
| 280 | Methoxyfenozide                               | 161050-58-4 | Daphnia magna | 55 | 58.640  | 0.000   | 4.206  | -3.874 | 12.602 | 2.093 | 1.998 |
| 281 | Methyl anthralinate                           | 134-20-3    | Daphnia magna | 20 | 52.320  | 5.969   | 1.055  | -2.516 | 12.918 | 2.402 | 0.919 |
| 282 | Methyl chloroform                             | 71-55-6     | Daphnia magna | 8  | 0.000   | 0.000   | 2.377  | -0.929 | 26.076 | 3.024 | 1.076 |
| 283 | Methyl isothiocyanate                         | 556-61-6    | Daphnia magna | 7  | 12.360  | 0.000   | 0.719  | -1.000 | 17.524 | 1.975 | 2.983 |
| 284 | Methyl nonyl ketone                           | 112-12-9    | Daphnia magna | 34 | 17.070  | 0.000   | 3.716  | -3.286 | 12.343 | 2.817 | 2.499 |
| 285 | Methyl parathion                              | 298-00-0    | Daphnia magna | 27 | 70.830  | 97.925  | 2.874  | -2.000 | 15.821 | 2.367 | 6.274 |
| 286 | Methylene bis(thiocyanate) Slime-trol RX32    | 6317-18-6   | Daphnia magna | 9  | 47.580  | 0.000   | 1.372  | -1.203 | 18.312 | 2.447 | 1.569 |
| 287 | Methylisothiazolinone (Kathon OM formulation) | 2682-20-4   | Daphnia magna | 12 | 22.000  | 0.000   | 0.447  | -1.604 | 15.731 | 2.325 | 2.806 |
| 288 | Methylisothiazolinone(Kathon 886 formulation) | 26172-55-4  | Daphnia magna | 12 | 22.000  | 0.000   | 1.100  | -1.500 | 18.196 | 2.388 | 2.920 |
| 289 | Metofluthrin                                  | 240494-70-6 | Daphnia magna | 45 | 35.530  | 5.969   | 4.281  | -3.344 | 13.607 | 1.937 | 4.885 |
| 290 | Metolachlor CGA-51502                         | 51218-45-2  | Daphnia magna | 41 | 29.540  | 0.000   | 3.164  | -3.354 | 13.770 | 2.914 | 1.265 |
| 291 | Metrafenone CL 4084564 metabolite             | 220899-03-6 | Daphnia magna | 46 | 53.990  | 0.000   | 4.331  | -3.529 | 15.524 | 2.287 | 0.905 |
| 292 | Metribuzin                                    | 21087-64-9  | Daphnia magna | 28 | 73.800  | 0.000   | 0.372  | -2.176 | 14.299 | 2.689 | 1.710 |

|     |                                                           |             |               |    |         |         |        |        |        |       |        |
|-----|-----------------------------------------------------------|-------------|---------------|----|---------|---------|--------|--------|--------|-------|--------|
| 293 | Mexacarbate (Zectran)                                     | 315-18-4    | Daphnia magna | 34 | 41.570  | 6.093   | 2.088  | -3.000 | 12.759 | 2.518 | 3.734  |
| 294 | MGK-264                                                   | 113-48-4    | Daphnia magna | 45 | 37.380  | 0.000   | 3.006  | -3.674 | 12.510 | 1.651 | 2.078  |
| 295 | Mirex (Cancelled in U.S.)                                 | 2385-85-5   | Daphnia magna | 22 | 0.000   | 0.000   | 7.664  | -2.027 | 24.798 | 2.368 | 2.442  |
| 296 | Mitin FF                                                  | 3567-25-7   | Daphnia magna | 43 | 104.730 | 6.031   | 6.983  | -3.036 | 16.455 | 1.585 | 1.742  |
| 297 | MTI                                                       | 82633-79-2  | Daphnia magna | 19 | 22.000  | 0.000   | 0.935  | -2.325 | 14.615 | 2.091 | 2.077  |
| 298 | Myclobutanil                                              | 88671-89-0  | Daphnia magna | 37 | 54.500  | 0.000   | 3.583  | -3.241 | 13.582 | 2.033 | 1.419  |
| 299 | N,N-Methylenebis morpholine<br>metabolite                 | 5625-90-1   | Daphnia magna | 31 | 24.940  | 0.000   | -0.392 | -2.562 | 12.932 | 1.687 | 0.890  |
| 300 | N6-Benzyladenine                                          | 1214-39-7   | Daphnia magna | 28 | 66.490  | 0.000   | 1.435  | -2.885 | 12.598 | 1.465 | 1.041  |
| 301 | Naled                                                     | 300-76-5    | Daphnia magna | 20 | 44.760  | 7.823   | 3.651  | -1.139 | 28.748 | 4.254 | 6.104  |
| 302 | Naphthalene                                               | 91-20-3     | Daphnia magna | 18 | 0.000   | 0.000   | 2.840  | -3.322 | 12.011 | 1.925 | 1.904  |
| 303 | Naphthaleneacetate acid ethyl<br>ester                    | 2122-70-5   | Daphnia magna | 30 | 26.300  | 5.969   | 2.945  | -3.500 | 12.509 | 1.865 | 0.954  |
| 304 | Naphthaleneacetic acid                                    | 86-87-3     | Daphnia magna | 24 | 37.300  | 5.969   | 2.467  | -3.263 | 12.581 | 1.940 | 0.015  |
| 305 | Napropamide                                               | 15299-99-7  | Daphnia magna | 41 | 29.540  | 0.000   | 3.476  | -3.674 | 12.510 | 1.900 | 1.278  |
| 306 | Neurolidol                                                | 7212-44-4   | Daphnia magna | 50 | 58.100  | 5.690   | 3.197  | -3.777 | 12.759 | 1.156 | 2.237  |
| 307 | Niclosamide                                               | 1420-04-8   | Daphnia magna | 29 | 92.470  | 0.000   | 3.860  | -2.719 | 15.193 | 1.860 | 3.214  |
| 308 | Nitrapyrin                                                | 1929-82-4   | Daphnia magna | 14 | 12.890  | 0.000   | 3.562  | -1.887 | 20.717 | 2.461 | 2.021  |
| 309 | N-Methyl-2-pyrrolidine<br>N-methylneodecanamide<br>(MNDA) | 120-94-5    | Daphnia magna | 17 | 3.240   | 0.000   | 0.712  | -2.154 | 12.344 | 2.184 | -1.769 |
| 310 |                                                           | 105726-67-8 | Daphnia magna | 36 | 29.100  | 0.000   | 2.729  | -3.131 | 12.471 | 4.418 | 0.154  |
| 311 | Nonanoic acid                                             | 112-05-0    | Daphnia magna | 29 | 37.300  | 5.969   | 2.822  | -2.830 | 12.736 | 2.796 | 0.217  |
| 312 | Novaluron 10 EC formulation                               | 116714-46-6 | Daphnia magna | 41 | 76.660  | 24.860  | 3.087  | -2.656 | 15.114 | 1.540 | 5.058  |
| 313 | Noviflumuron                                              | 121451-02-3 | Daphnia magna | 40 | 67.430  | 18.316  | 6.245  | -2.599 | 15.821 | 1.974 | 6.235  |
| 314 | OBPA                                                      | 58-36-6     | Daphnia magna | 45 | 27.690  | 179.639 | 2.826  | -4.020 | 16.762 | 1.285 | 5.020  |
| 315 | Octhilinone                                               | 26530-20-1  | Daphnia magna | 34 | 20.310  | 0.000   | 2.576  | -2.991 | 13.871 | 1.879 | 3.300  |
| 316 | Ortho-phenyl phenol                                       | 90-43-7     | Daphnia magna | 23 | 20.230  | 0.000   | 3.059  | -3.416 | 12.318 | 1.885 | 1.831  |
| 317 | Oryzalin                                                  | 19044-88-3  | Daphnia magna | 41 | 149.680 | 11.375  | 1.777  | -2.360 | 14.270 | 3.148 | 2.363  |
| 318 | Oxadiazon                                                 | 19666-30-9  | Daphnia magna | 40 | 57.260  | 5.756   | 4.217  | -3.041 | 14.867 | 2.064 | 2.814  |
| 319 | Oxadixyl (canceled in the U.S.)                           | 77732-09-3  | Daphnia magna | 38 | 59.080  | 6.093   | 1.650  | -3.025 | 13.008 | 2.196 | -0.280 |
| 320 | Oxamyl                                                    | 23135-22-0  | Daphnia magna | 27 | 71.000  | 6.093   | 0.107  | -1.904 | 14.726 | 3.899 | 2.669  |
| 321 | Oxazolidine E                                             | 7747-35-5   | Daphnia magna | 23 | 21.700  | 0.000   | 0.413  | -2.325 | 13.008 | 2.153 | 0.533  |
| 322 | Oxycarboxin                                               | 5259-88-1   | Daphnia magna | 31 | 72.470  | 0.000   | 1.302  | -2.780 | 14.122 | 1.944 | 0.588  |

|     |                                            |             |               |    |        |         |        |        |        |       |        |
|-----|--------------------------------------------|-------------|---------------|----|--------|---------|--------|--------|--------|-------|--------|
| 323 | Oxydemeton-methyl                          | 301-12-2    | Daphnia magna | 29 | 55.430 | 6.798   | 2.487  | -1.708 | 17.782 | 3.610 | 3.187  |
| 324 | Oxyfluorfen                                | 42874-03-3  | Daphnia magna | 35 | 61.600 | 11.864  | 5.458  | -2.866 | 14.609 | 1.877 | 3.655  |
| 325 | Oxythioquinox                              | 2439-01-2   | Daphnia magna | 21 | 42.850 | 0.000   | 2.575  | -2.605 | 15.217 | 1.688 | 3.291  |
| 326 | Paclobutrazol                              | 76738-62-0  | Daphnia magna | 40 | 50.940 | 0.000   | 3.122  | -3.241 | 13.682 | 1.984 | 0.947  |
| 327 | Paranitrophenol                            | 100-02-7    | Daphnia magna | 15 | 63.370 | 0.000   | 1.300  | -1.993 | 13.407 | 2.260 | 1.365  |
| 328 | Parathion 8E Formulation                   | 56-38-2     | Daphnia magna | 33 | 70.830 | 110.766 | 3.654  | -2.317 | 15.397 | 2.418 | 4.987  |
| 329 | Pebulate                                   | 1114-71-2   | Daphnia magna | 34 | 20.310 | 0.000   | 3.372  | -2.846 | 14.014 | 3.632 | 1.474  |
| 330 | Pendimethalin                              | 40487-42-1  | Daphnia magna | 39 | 98.310 | 5.687   | 3.720  | -2.809 | 13.108 | 2.990 | 3.002  |
| 331 | Pentachloronitrobenzene (PCNB)             | 82-68-8     | Daphnia magna | 14 | 43.140 | 5.687   | 4.862  | -1.632 | 21.095 | 2.861 | 2.584  |
| 332 | Pentachlorophenol                          | 87-86-5     | Daphnia magna | 13 | 20.230 | 0.000   | 4.659  | -1.792 | 22.111 | 2.760 | 2.295  |
| 333 | Penthiopyrad 20 SC formulation             | 183675-82-3 | Daphnia magna | 44 | 46.920 | 6.176   | 4.902  | -3.057 | 14.136 | 1.982 | 3.094  |
| 334 | Permethrin 3.2 EC                          | 52645-53-1  | Daphnia magna | 46 | 35.530 | 5.969   | 6.113  | -3.797 | 14.274 | 1.396 | 6.414  |
| 335 | Phenmedipham                               | 13684-63-4  | Daphnia magna | 38 | 76.660 | 12.186  | 3.784  | -3.243 | 12.918 | 1.697 | 1.331  |
| 336 | Phenthoate (Cidial)                        | 2597-03-7   | Daphnia magna | 37 | 44.760 | 123.194 | 3.924  | -2.683 | 15.960 | 2.723 | 5.227  |
| 337 | Phosalone                                  | 2310-17-0   | Daphnia magna | 37 | 53.600 | 137.193 | 4.619  | -2.510 | 16.795 | 1.919 | 2.486  |
| 338 | Phosmet                                    | 732-11-6    | Daphnia magna | 32 | 55.840 | 120.590 | 2.874  | -2.459 | 16.065 | 1.964 | 4.753  |
| 339 | Phosphamidon                               | 13171-21-6  | Daphnia magna | 37 | 65.070 | 7.823   | 2.743  | -2.317 | 15.585 | 4.536 | 4.373  |
| 340 | Phosphoric acid Divosan X-Tend formulation | 7664-38-2   | Daphnia magna | 8  | 77.760 | 7.823   | -0.929 | 0.000  | 18.994 | 3.024 | -0.030 |
| 341 | Phostebupirim                              | 96182-53-5  | Daphnia magna | 44 | 53.470 | 126.569 | 4.222  | -2.809 | 14.760 | 2.513 | 6.611  |
| 342 | Picoxystrobin                              | 117428-22-5 | Daphnia magna | 42 | 57.650 | 12.146  | 3.840  | -3.254 | 13.508 | 1.926 | 4.185  |
| 343 | Pinoxaden 100 EC formulation               | 243973-20-8 | Daphnia magna | 61 | 62.460 | 5.969   | 3.732  | -3.853 | 12.699 | 1.951 | 2.291  |
| 344 | Piperalin                                  | 3478-94-2   | Daphnia magna | 42 | 29.540 | 5.969   | 4.415  | -3.347 | 14.718 | 1.594 | 2.242  |
| 345 | Piperonyl butoxide                         | 51-03-6     | Daphnia magna | 54 | 46.150 | 0.000   | 3.718  | -3.630 | 12.842 | 1.518 | 2.822  |
| 346 | Pirimicarb                                 | 23103-98-2  | Daphnia magna | 35 | 58.560 | 6.093   | 1.220  | -2.645 | 12.950 | 2.616 | 4.564  |
| 347 | Pirimiphos-methyl                          | 29232-93-7  | Daphnia magna | 40 | 56.710 | 119.502 | 2.910  | -2.459 | 15.009 | 2.642 | 6.163  |
| 348 | Prallethrin                                | 23031-36-9  | Daphnia magna | 46 | 43.370 | 5.969   | 3.449  | -3.851 | 12.555 | 1.914 | 4.685  |
| 349 | Profenofos                                 | 41198-08-7  | Daphnia magna | 33 | 35.530 | 6.798   | 5.769  | -2.548 | 19.918 | 2.534 | 5.604  |
| 350 | Prometon                                   | 1610-18-0   | Daphnia magna | 35 | 71.960 | 6.010   | 1.521  | -2.500 | 12.884 | 2.469 | 0.943  |
| 351 | Prometryn                                  | 7287-19-6   | Daphnia magna | 35 | 62.730 | 0.000   | 2.234  | -2.500 | 13.888 | 2.469 | 1.113  |
| 352 | Propachlor                                 | 1918-16-7   | Daphnia magna | 28 | 20.310 | 0.000   | 2.667  | -2.991 | 14.113 | 2.555 | 1.487  |
| 353 | Propargite                                 | 2312-35-8   | Daphnia magna | 51 | 47.590 | 148.000 | 4.517  | -3.630 | 13.511 | 1.788 | 3.675  |
| 354 | Propetamphos                               | 31218-83-4  | Daphnia magna | 38 | 56.790 | 108.242 | 2.722  | -2.404 | 15.362 | 4.095 | 4.931  |

|     |                                             |             |               |     |         |        |        |        |        |       |       |
|-----|---------------------------------------------|-------------|---------------|-----|---------|--------|--------|--------|--------|-------|-------|
| 355 | Propiconazole Tilt 3.6 E                    | 60207-90-1  | Daphnia magna | 39  | 49.170  | 0.000  | 3.653  | -3.041 | 14.777 | 1.733 | 2.029 |
| 356 | Propoxur                                    | 114-26-1    | Daphnia magna | 30  | 47.560  | 6.093  | 2.192  | -2.865 | 12.942 | 2.419 | 4.279 |
| 357 | Propionic acid                              | 79-09-4     | Daphnia magna | 11  | 37.300  | 5.969  | 0.481  | -1.393 | 13.606 | 2.540 | 0.514 |
| 358 | Prothioconazole (JAU 6476<br>Technical)     | 178928-70-6 | Daphnia magna | 36  | 53.840  | 0.000  | 2.857  | -2.928 | 15.674 | 1.703 | 2.458 |
| 359 | Pymetrozine                                 | 123312-89-0 | Daphnia magna | 27  | 69.950  | 6.031  | 0.817  | -2.500 | 12.884 | 1.705 | 0.397 |
| 360 | Pyraclostrobin                              | 175013-18-0 | Daphnia magna | 45  | 65.820  | 6.093  | 4.239  | -3.346 | 13.692 | 1.465 | 4.393 |
| 361 | Pyraflufen-ethyl                            | 129630-19-9 | Daphnia magna | 39  | 62.580  | 12.581 | 4.076  | -2.712 | 15.388 | 1.988 | 2.735 |
| 362 | Pyrethrins                                  | 8003-34-7   | Daphnia magna | 55  | 69.670  | 11.939 | 3.711  | -3.874 | 12.750 | 1.880 | 4.507 |
| 363 | Pyridaben                                   | 96489-71-3  | Daphnia magna | 49  | 34.890  | 0.000  | 5.242  | -3.630 | 14.156 | 1.778 | 5.838 |
| 364 | Pyridalyl                                   | 179101-81-6 | Daphnia magna | 43  | 40.580  | 6.176  | 6.953  | -3.015 | 16.449 | 1.562 | 3.135 |
| 365 | Pyridate                                    | 55512-33-9  | Daphnia magna | 48  | 52.080  | 5.301  | 6.390  | -3.529 | 14.230 | 1.672 | 2.545 |
| 366 | Pyrifluquinazon IV-02 degradate             | 337458-27-2 | Daphnia magna | 47  | 65.540  | 24.052 | 4.364  | -2.969 | 14.038 | 1.779 | 5.625 |
| 367 | Pyrimethanil (radiolabeled)                 | 53112-28-0  | Daphnia magna | 28  | 37.810  | 0.000  | 2.837  | -3.126 | 12.410 | 1.769 | 1.817 |
| 368 | Pyriproxyfen                                | 95737-68-1  | Daphnia magna | 43  | 40.580  | 0.000  | 4.720  | -3.821 | 12.593 | 1.260 | 2.905 |
| 369 | Quinclorac                                  | 84087-01-4  | Daphnia magna | 20  | 50.190  | 5.969  | 3.240  | -2.605 | 15.801 | 2.087 | 0.910 |
| 370 | Quinoxifen                                  | 124495-18-7 | Daphnia magna | 28  | 22.120  | 0.000  | 5.473  | -3.241 | 15.004 | 1.602 | 3.530 |
| 371 | Quizalofop-ethyl                            | 76578-14-8  | Daphnia magna | 43  | 70.540  | 5.969  | 4.406  | -3.435 | 13.680 | 1.421 | 2.003 |
| 372 | Quizalofop-P                                | 100646-51-3 | Daphnia magna | 37  | 81.540  | 5.969  | 3.927  | -3.248 | 13.819 | 1.375 | 0.822 |
| 373 | Resmethrin                                  | 10453-86-8  | Daphnia magna | 51  | 39.440  | 5.969  | 5.152  | -4.087 | 12.490 | 1.361 | 6.187 |
| 374 | Rimsulfuron IN-70942-2<br>metabolite        | 122931-48-0 | Daphnia magna | 45  | 166.540 | 6.031  | 0.193  | -2.404 | 14.797 | 1.991 | 0.382 |
| 375 | Rotenone                                    | 83-79-4     | Daphnia magna | 51  | 63.220  | 0.000  | 3.703  | -3.853 | 12.836 | 1.347 | 5.028 |
| 376 | Ryanodine Ryan 50 powder                    | 15662-33-6  | Daphnia magna | 70  | 172.700 | 5.969  | -0.670 | -3.664 | 13.094 | 1.675 | 4.050 |
| 377 | Sedaxane SYN524464 (trans +<br>cis isomers) | 874967-67-6 | Daphnia magna | 43  | 46.920  | 0.000  | 4.124  | -3.439 | 13.009 | 1.368 | 1.745 |
| 378 | Sethoxydim Poast Herbicide<br>formulation   | 74051-80-2  | Daphnia magna | 51  | 58.890  | 0.000  | 4.502  | -3.446 | 13.557 | 2.598 | 2.100 |
| 379 | Simazine                                    | 122-34-9    | Daphnia magna | 25  | 62.730  | 0.000  | 1.389  | -1.993 | 14.582 | 2.330 | 2.263 |
| 380 | s-Methoprene                                | 65733-16-6  | Daphnia magna | 56  | 35.530  | 5.969  | 5.062  | -3.851 | 12.555 | 3.681 | 2.936 |
| 381 | S-Metolachlor                               | 87392-12-9  | Daphnia magna | 41  | 29.540  | 0.000  | 3.164  | -3.354 | 13.770 | 2.914 | 1.038 |
| 382 | Spinosyn Factor D metabolite                | 131929-63-0 | Daphnia magna | 117 | 111.220 | 5.969  | 5.487  | -4.495 | 12.816 | 1.171 | 2.285 |
| 383 | Spiromesifen BSN 2060 SC 240                | 283594-90-1 | Daphnia magna | 57  | 52.600  | 11.939 | 5.172  | -4.050 | 12.602 | 1.854 | 1.318 |

| formulation |                                                   |             |               |    |         |         |        |        |        |       |        |
|-------------|---------------------------------------------------|-------------|---------------|----|---------|---------|--------|--------|--------|-------|--------|
| 384         | Spiroxamine                                       | 118134-30-8 | Daphnia magna | 56 | 21.700  | 0.000   | 4.066  | -3.765 | 12.486 | 1.823 | 2.067  |
| 385         | Streptomycin                                      | 57-92-1     | Daphnia magna | 77 | 326.990 | 0.000   | -7.093 | -2.794 | 13.557 | 1.921 | 0.205  |
| 386         | Strychnine                                        | 57-24-9     | Daphnia magna | 47 | 32.780  | 0.000   | 2.093  | -3.901 | 12.490 | 1.449 | 1.524  |
| 387         | Sulfentrazone                                     | 122836-35-5 | Daphnia magna | 33 | 85.990  | 12.239  | 2.416  | -2.163 | 16.396 | 2.117 | 0.807  |
| 388         | Sulfluramid                                       | 4151-50-2   | Daphnia magna | 37 | 46.170  | 46.966  | 4.893  | -1.598 | 16.811 | 6.838 | 3.154  |
| 389         | Sulfotepp                                         | 3689-24-5   | Daphnia magna | 39 | 46.150  | 115.316 | 4.364  | -1.924 | 17.774 | 4.649 | 5.110  |
| 390         | Sulprofos                                         | 35400-43-2  | Daphnia magna | 38 | 18.460  | 124.354 | 5.574  | -2.780 | 16.850 | 2.404 | 5.633  |
| 391         | TCMTB                                             | 21564-17-0  | Daphnia magna | 20 | 36.680  | 0.000   | 3.560  | -2.448 | 16.594 | 1.700 | 4.015  |
| 392         | Tebuconazole                                      | 107534-96-3 | Daphnia magna | 43 | 50.940  | 0.000   | 3.342  | -3.347 | 13.602 | 1.892 | 2.029  |
| 393         | Tebufenozide                                      | 112410-23-8 | Daphnia magna | 54 | 49.410  | 0.000   | 4.452  | -3.977 | 12.471 | 2.003 | 1.967  |
| 394         | Tebufenpyrad                                      | 119168-77-3 | Daphnia magna | 47 | 46.920  | 0.000   | 3.863  | -3.540 | 13.464 | 1.762 | 3.919  |
| 395         | Tebuthiuron                                       | 34014-18-1  | Daphnia magna | 31 | 58.120  | 6.031   | 1.611  | -2.344 | 14.146 | 2.491 | -0.114 |
| 396         | Tefluthrin                                        | 79538-32-2  | Daphnia magna | 41 | 26.300  | 12.146  | 5.552  | -2.994 | 14.986 | 1.942 | 6.777  |
| 397         | Tembotrione                                       | 335104-84-2 | Daphnia magna | 44 | 94.580  | 6.176   | 2.943  | -2.919 | 15.168 | 2.144 | 0.955  |
| 398         | Temephos Abate 4E formulation                     | 3383-96-8   | Daphnia magna | 49 | 55.380  | 175.952 | 6.396  | -2.818 | 16.530 | 1.671 | 7.627  |
| 399         | Tepraloxydim (BAS 620 00 H)                       | 149979-41-9 | Daphnia magna | 47 | 68.120  | 0.000   | 3.739  | -3.344 | 13.811 | 1.867 | 1.665  |
| 400         | Terbacil                                          | 5902-51-2   | Daphnia magna | 27 | 54.860  | 5.690   | 0.772  | -2.448 | 14.540 | 2.846 | 0.523  |
| 401         | Terbufos                                          | 13071-79-9  | Daphnia magna | 37 | 18.460  | 108.224 | 4.889  | -2.344 | 17.818 | 3.954 | 5.969  |
| 402         | Terbutylazine                                     | 5915-41-3   | Daphnia magna | 31 | 62.730  | 0.000   | 2.167  | -2.344 | 14.239 | 2.442 | 1.035  |
| 403         | Terbutryn                                         | 886-50-0    | Daphnia magna | 35 | 62.730  | 0.000   | 2.236  | -2.500 | 13.888 | 2.500 | 1.958  |
| 404         | Tetrachlorvinphos                                 | 961-11-5    | Daphnia magna | 30 | 63.220  | 7.823   | 5.465  | -2.092 | 18.519 | 2.761 | 5.321  |
| 405         | Tetraconazole                                     | 112281-77-3 | Daphnia magna | 34 | 39.940  | 12.534  | 4.243  | -2.557 | 15.698 | 1.986 | 2.151  |
| 406         | Tetrahydro-2(nitromethylene)-<br>2H-1, 3-thiazine | 58842-20-9  | Daphnia magna | 18 | 55.170  | 0.000   | 0.788  | -1.661 | 15.213 | 2.131 | 0.675  |
| 407         | Tetramethrin                                      | 7696-12-0   | Daphnia magna | 49 | 63.680  | 5.969   | 2.965  | -3.630 | 12.759 | 1.539 | 3.867  |
| 408         | Thiabendazole                                     | 148-79-8    | Daphnia magna | 21 | 41.570  | 0.000   | 2.204  | -2.720 | 13.871 | 1.615 | 2.812  |
| 409         | Thiacloprid                                       | 111988-49-9 | Daphnia magna | 25 | 52.280  | 0.000   | 2.121  | -2.500 | 15.229 | 1.752 | 1.050  |
| 410         | Thiazopyr                                         | 117718-60-2 | Daphnia magna | 43 | 51.550  | 12.146  | 4.517  | -2.893 | 14.586 | 2.487 | 1.813  |
| 411         | Thidiazuron                                       | 51707-55-2  | Daphnia magna | 23 | 66.910  | 6.031   | 2.182  | -2.344 | 14.146 | 1.637 | 1.587  |
| 412         | Thiencarbazone methyl M15<br>degradate            | 317815-83-1 | Daphnia magna | 39 | 138.590 | 23.701  | -0.306 | -2.229 | 15.051 | 2.087 | 1.922  |
| 413         | Thiobencarb                                       | 28249-77-6  | Daphnia magna | 32 | 20.310  | 0.000   | 4.035  | -3.000 | 15.104 | 2.181 | 3.406  |

|     |                                             |             |               |    |         |         |        |        |        |       |       |
|-----|---------------------------------------------|-------------|---------------|----|---------|---------|--------|--------|--------|-------|-------|
| 414 | Thiodicarb                                  | 59669-26-0  | Daphnia magna | 39 | 75.960  | 12.190  | 2.601  | -2.092 | 16.016 | 2.815 | 4.118 |
| 415 | Thiophanate-methyl                          | 23564-05-8  | Daphnia magna | 36 | 100.720 | 12.186  | 1.792  | -2.432 | 14.922 | 2.448 | 1.810 |
| 416 | Tolclofos-methyl                            | 57018-04-9  | Daphnia magna | 28 | 27.690  | 110.801 | 4.581  | -2.250 | 18.128 | 2.645 | 0.798 |
| 417 | Tolfenpyrad                                 | 129558-76-5 | Daphnia magna | 49 | 56.150  | 0.000   | 4.667  | -3.698 | 13.396 | 1.344 | 5.584 |
| 418 | Tolyfluanid                                 | 731-27-1    | Daphnia magna | 32 | 40.620  | 14.128  | 3.314  | -2.236 | 17.587 | 2.862 | 3.262 |
| 419 | Tolyfluanid DMST metabolite                 | 66840-71-9  | Daphnia magna | 28 | 49.410  | 10.209  | 1.213  | -2.448 | 14.298 | 2.372 | 0.838 |
| 420 | Toxaphene (Cancelled in U.S.)               | 8001-35-2   | Daphnia magna | 26 | 0.000   | 0.000   | 6.073  | -2.317 | 22.430 | 2.903 | 4.615 |
| 421 | Tralkoxydim JF9517 formulation              | 87820-88-0  | Daphnia magna | 51 | 58.890  | 0.000   | 4.673  | -3.821 | 12.593 | 2.036 | 2.223 |
| 422 | Tralomethrin                                | 66841-25-6  | Daphnia magna | 49 | 59.320  | 5.969   | 7.461  | -3.598 | 21.529 | 1.549 | 7.232 |
| 423 | Triadimefon                                 | 43121-43-3  | Daphnia magna | 36 | 57.010  | 0.000   | 3.124  | -3.025 | 13.881 | 1.984 | 2.230 |
| 424 | Triadimenol                                 | 55219-65-3  | Daphnia magna | 38 | 60.170  | 0.000   | 2.916  | -3.025 | 13.881 | 1.984 | 2.073 |
| 425 | Triallate                                   | 2303-17-5   | Daphnia magna | 32 | 20.310  | 0.000   | 4.844  | -2.500 | 18.034 | 4.161 | 3.525 |
| 426 | Triazamate                                  | 112143-82-5 | Daphnia magna | 43 | 77.320  | 12.000  | 1.760  | -2.719 | 13.916 | 2.673 | 4.351 |
| 427 | Tribufos                                    | 78-48-8     | Daphnia magna | 44 | 17.070  | 0.000   | 6.694  | -2.885 | 16.900 | 3.946 | 4.665 |
| 428 | Tributyltin fluoride(TBTF)                  | 1983-10-4   | Daphnia magna | 41 | 0.000   | 94.422  | 5.302  | -3.263 | 20.131 | 3.890 | 6.096 |
| 429 | Tributyltin oxide                           | 56-35-9     | Daphnia magna | 81 | 9.230   | 184.206 | 9.695  | -4.227 | 20.062 | 5.663 | 5.553 |
| 430 | Trichloromelamine                           | 7673-09-8   | Daphnia magna | 15 | 74.760  | 0.000   | 1.569  | -0.896 | 18.870 | 2.405 | 2.282 |
| 431 | Trichloro-s-triazinetriene                  | 87-90-1     | Daphnia magna | 12 | 66.000  | 17.069  | -0.823 | -0.896 | 19.367 | 2.760 | 3.136 |
| 432 | Triclopyr acid                              | 55335-06-3  | Daphnia magna | 18 | 59.420  | 5.969   | 2.505  | -1.904 | 18.031 | 2.368 | 0.286 |
| 433 | Triclopyr butoxyethyl ester<br>(Garlon 4)   | 64700-56-7  | Daphnia magna | 37 | 57.650  | 5.969   | 3.781  | -2.719 | 16.215 | 2.078 | 3.008 |
| 434 | Triclosan                                   | 3380-34-5   | Daphnia magna | 24 | 29.460  | 0.000   | 5.145  | -2.885 | 16.617 | 1.837 | 2.871 |
| 435 | Tricosene                                   | 27519-02-4  | Daphnia magna | 69 | 0.000   | 0.000   | 8.994  | -4.524 | 12.011 | 2.922 | 3.085 |
| 436 | Tridecen-1-yl acetate (Z and E<br>acetates) | 65954-19-0  | Daphnia magna | 45 | 26.300  | 5.969   | 4.637  | -3.607 | 12.480 | 2.893 | 2.649 |
| 437 | Tridiphane (DOWCO 356)                      | 58138-08-2  | Daphnia magna | 23 | 12.530  | 0.000   | 4.979  | -2.500 | 19.586 | 2.006 | 3.108 |
| 438 | Trifloxystrobin                             | 141517-21-7 | Daphnia magna | 48 | 69.480  | 12.146  | 4.170  | -3.350 | 13.422 | 1.849 | 4.208 |
| 439 | Trifluralin                                 | 1582-09-8   | Daphnia magna | 39 | 89.520  | 6.176   | 4.148  | -2.557 | 13.876 | 3.148 | 3.126 |
| 440 | Triforine                                   | 26644-46-2  | Daphnia magna | 36 | 64.680  | 0.000   | 1.489  | -2.027 | 19.130 | 2.678 | 1.191 |
| 441 | Trimethacarb                                | 2686-99-9   | Daphnia magna | 29 | 38.330  | 6.093   | 2.330  | -2.991 | 12.723 | 2.485 | 4.031 |
| 442 | Tris(hydroxymethyl)nitromethane             | 126-11-4    | Daphnia magna | 19 | 103.830 | 0.000   | -2.021 | -1.329 | 14.205 | 4.154 | 0.276 |
| 443 | Triticonazole                               | 131983-72-7 | Daphnia magna | 42 | 50.940  | 0.000   | 3.566  | -3.446 | 13.530 | 1.656 | 1.621 |
| 444 | Vinclozolin                                 | 50471-44-8  | Daphnia magna | 27 | 46.610  | 6.093   | 3.421  | -2.780 | 15.391 | 2.125 | 1.894 |



|     |                              |             |                    |    |        |         |        |        |        |       |       |
|-----|------------------------------|-------------|--------------------|----|--------|---------|--------|--------|--------|-------|-------|
| 445 | Warfarin                     | 81-81-2     | Daphnia magna      | 39 | 67.510 | 5.626   | 3.610  | -3.737 | 12.705 | 1.778 | 0.644 |
| 446 | Acrolein                     | 107-02-8    | Americamysis bahia | 8  | 17.070 | 0.000   | 0.371  | -1.500 | 13.008 | 1.975 | 2.050 |
| 447 | Bifenox                      | 42576-02-3  | Americamysis bahia | 31 | 78.670 | 5.969   | 4.481  | -2.838 | 15.139 | 1.928 | 3.911 |
| 448 | Butafenacil                  | 134605-64-4 | Americamysis bahia | 50 | 96.600 | 23.805  | 2.873  | -3.125 | 14.271 | 2.090 | 3.530 |
| 449 | Carfentrazone-ethyl          | 128639-02-1 | Americamysis bahia | 40 | 66.120 | 18.208  | 3.243  | -2.712 | 15.311 | 2.052 | 2.551 |
| 450 | Cimecticarb                  | 95266-40-3  | Americamysis bahia | 34 | 80.670 | 5.969   | 1.320  | -3.012 | 13.119 | 1.937 | 1.589 |
| 451 | Clothianidin                 | 210880-92-5 | Americamysis bahia | 23 | 92.450 | 0.000   | 0.653  | -1.563 | 16.108 | 2.160 | 3.690 |
| 452 | Cyclanilide                  | 113136-77-9 | Americamysis bahia | 26 | 69.890 | 5.969   | 3.446  | -2.645 | 15.590 | 1.885 | 1.739 |
| 453 | Dicofol                      | 115-32-2    | Americamysis bahia | 29 | 20.230 | 0.000   | 5.600  | -3.025 | 18.071 | 2.172 | 3.791 |
| 454 | Dieldrin (Cancelled in U.S.) | 60-57-1     | Americamysis bahia | 27 | 12.530 | 0.000   | 4.481  | -2.683 | 19.624 | 1.758 | 5.013 |
| 455 | Dimethoate                   | 60-51-5     | Americamysis bahia | 25 | 51.050 | 81.815  | 2.206  | -1.494 | 18.097 | 3.720 | 1.184 |
| 456 | Dimethomorph                 | 110488-70-5 | Americamysis bahia | 49 | 48.000 | 0.000   | 3.648  | -3.698 | 13.544 | 1.669 | 1.070 |
| 457 | Dinotefuran                  | 165252-70-0 | Americamysis bahia | 28 | 88.790 | 0.000   | -0.620 | -1.904 | 13.436 | 2.123 | 2.408 |
| 458 | EPN (Cancelled in U.S.)      | 2104-64-5   | Americamysis bahia | 36 | 61.600 | 128.121 | 4.028  | -2.928 | 14.724 | 1.899 | 4.978 |
| 459 | Flufenacet                   | 142459-58-3 | Americamysis bahia | 37 | 55.320 | 6.176   | 3.516  | -2.675 | 14.593 | 1.820 | 2.126 |
| 460 | Flufenpyr-ethyl              | 188489-07-8 | Americamysis bahia | 40 | 70.420 | 12.146  | 3.294  | -2.818 | 14.653 | 2.014 | 2.289 |
| 461 | Flumetralin                  | 62924-70-3  | Americamysis bahia | 40 | 89.520 | 6.176   | 5.341  | -2.747 | 14.630 | 2.300 | 3.652 |
| 462 | Flumiclorac                  | 87546-18-7  | Americamysis bahia | 37 | 83.910 | 5.969   | 2.686  | -3.057 | 14.193 | 1.715 | 2.800 |
| 463 | Fluthiacet methyl            | 117337-19-6 | Americamysis       | 40 | 65.590 | 10.842  | 2.795  | -2.786 | 15.551 | 1.568 | 3.159 |

|     |                                  |             |                       |    |         |        |        |        |        |       |        |
|-----|----------------------------------|-------------|-----------------------|----|---------|--------|--------|--------|--------|-------|--------|
|     |                                  |             | bahia                 |    |         |        |        |        |        |       |        |
| 464 | Flutolanil                       | 66332-96-5  | Americamysis<br>bahia | 39 | 41.820  | 6.176  | 5.129  | -3.344 | 13.356 | 1.901 | 3.396  |
| 465 | Halosulfuron methyl              | 100784-20-1 | Americamysis<br>bahia | 43 | 163.630 | 12.000 | 0.178  | -2.232 | 14.989 | 2.014 | 0.601  |
| 466 | Heptachlor (Cancelled in U.S.)   | 76-44-8     | Americamysis<br>bahia | 22 | 0.000   | 0.000  | 5.094  | -2.404 | 21.664 | 2.137 | 5.041  |
| 467 | Isoxaflutole                     | 141112-29-0 | Americamysis<br>bahia | 36 | 77.240  | 6.176  | 3.205  | -2.866 | 14.468 | 1.749 | 4.305  |
| 468 | Maneb 80WP                       | 12427-38-2  | Americamysis<br>bahia | 17 | 24.060  | 89.875 | 1.128  | -1.258 | 23.569 | 2.237 | 4.905  |
| 469 | Mefenoxam A13947A<br>formulation | 70630-17-0  | Americamysis<br>bahia | 41 | 55.840  | 5.969  | 1.844  | -3.241 | 12.908 | 2.950 | 1.591  |
| 470 | Metronidazole                    | 443-48-1    | Americamysis<br>bahia | 21 | 81.190  | 5.818  | 0.092  | -1.792 | 13.507 | 2.510 | -0.027 |
| 471 | Mevinphos                        | 7786-34-7   | Americamysis<br>bahia | 27 | 71.060  | 13.792 | 1.481  | -1.904 | 15.075 | 3.964 | 5.237  |
| 472 | Molinate                         | 2212-67-1   | Americamysis<br>bahia | 26 | 20.310  | 0.000  | 2.345  | -2.516 | 14.378 | 2.205 | 2.358  |
| 473 | Norflurazon                      | 27314-13-2  | Americamysis<br>bahia | 29 | 46.920  | 6.176  | 2.946  | -2.593 | 14.730 | 2.006 | 1.740  |
| 474 | Penflufen                        | 494793-67-8 | Americamysis<br>bahia | 33 | 58.200  | 12.207 | 3.946  | -2.866 | 13.965 | 1.758 | 2.139  |
| 475 | Primisulfuron-methyl             | 86209-51-0  | Americamysis<br>bahia | 43 | 146.490 | 30.342 | -0.308 | -2.397 | 14.718 | 1.747 | 1.466  |
| 476 | Prodiamine                       | 29091-21-2  | Americamysis<br>bahia | 41 | 115.540 | 11.864 | 3.730  | -2.484 | 13.882 | 3.286 | 2.222  |
| 477 | Propanil                         | 709-98-8    | Americamysis<br>bahia | 22 | 29.100  | 0.000  | 3.342  | -2.562 | 16.078 | 2.287 | 2.748  |
| 478 | Propyzamide                      | 23950-58-5  | Americamysis<br>bahia | 27 | 32.590  | 0.000  | 3.710  | -3.000 | 15.315 | 2.496 | 1.600  |
| 479 | Pyrasulfotole                    | 365400-11-9 | Americamysis<br>bahia | 37 | 89.260  | 6.176  | 2.087  | -2.675 | 14.551 | 2.214 | 2.518  |
| 480 | Saflufenacil                     | 372137-35-4 | Americamysis<br>bahia | 49 | 110.480 | 22.075 | 1.662  | -2.656 | 15.116 | 2.199 | 1.770  |
| 481 | Spirotetramat                    | 203313-25-1 | Americamysis          | 54 | 73.860  | 6.155  | 3.645  | -3.698 | 12.823 | 1.837 | 1.832  |

|     |                                          |             |                       |    |         |         |        |        |        |       |        |
|-----|------------------------------------------|-------------|-----------------------|----|---------|---------|--------|--------|--------|-------|--------|
|     |                                          |             | bahia                 |    |         |         |        |        |        |       |        |
| 482 | Sulfoxaflor                              | 946578-00-3 | Americamysis<br>bahia | 28 | 70.680  | 6.176   | 2.942  | -2.317 | 14.844 | 2.524 | 2.617  |
| 483 | Thiamethoxam                             | 153719-23-4 | Americamysis<br>bahia | 28 | 84.100  | 0.000   | 1.023  | -1.853 | 15.647 | 1.904 | 1.626  |
| 484 | Thiram                                   | 137-26-8    | Americamysis<br>bahia | 26 | 6.480   | 86.908  | 2.245  | -1.792 | 19.029 | 1.848 | 4.855  |
| 485 | Topramezone                              | 210631-68-8 | Americamysis<br>bahia | 42 | 110.850 | 0.000   | 1.193  | -2.972 | 13.850 | 1.783 | 2.129  |
| 486 | Triethylene glycol                       | 112-27-6    | Americamysis<br>bahia | 24 | 58.920  | 0.000   | -0.996 | -1.993 | 13.606 | 2.648 | -1.865 |
| 487 | Triflumizole                             | 68694-11-1  | Americamysis<br>bahia | 38 | 39.410  | 6.176   | 4.560  | -2.950 | 14.375 | 1.997 | 2.761  |
| 488 | Zoxamide                                 | 156052-68-5 | Americamysis<br>bahia | 36 | 46.170  | 0.000   | 4.008  | -3.025 | 16.026 | 2.678 | 3.652  |
| 489 | Allethrin                                | 584-79-2    | Gammarus<br>fasciatus | 48 | 43.370  | 5.969   | 4.002  | -3.851 | 12.555 | 1.914 | 4.439  |
| 490 | Antimycin A                              | 1397-94-0   | Gammarus<br>fasciatus | 79 | 157.330 | 17.908  | 3.480  | -3.795 | 13.034 | 2.209 | 7.836  |
| 491 | Benzyl benzoate                          | 120-51-4    | Gammarus<br>fasciatus | 28 | 26.300  | 5.969   | 3.044  | -3.500 | 12.509 | 1.633 | 1.646  |
| 492 | Cacodylic acid                           | 75-60-5     | Gammarus<br>fasciatus | 12 | 37.300  | 33.089  | 0.111  | -0.929 | 26.188 | 3.024 | 0.010  |
| 493 | Crotoxyphos                              | 7700-17-6   | Gammarus<br>fasciatus | 40 | 71.060  | 13.792  | 3.612  | -2.928 | 14.053 | 2.325 | 4.456  |
| 494 | Cruformate (Ruelene 8R)                  | 299-86-5    | Gammarus<br>fasciatus | 37 | 47.560  | 7.746   | 3.990  | -2.780 | 15.142 | 2.579 | 1.897  |
| 495 | Demeton                                  | 8065-48-3   | Gammarus<br>fasciatus | 33 | 35.530  | 6.798   | 3.654  | -2.176 | 17.085 | 3.709 | 3.731  |
| 496 | Dichloro diphenyl dichlorethane<br>(TDE) | 72-54-8     | Gammarus<br>fasciatus | 28 | 0.000   | 0.000   | 5.929  | -3.243 | 17.220 | 1.949 | 5.727  |
| 497 | EPN (Cancelled in U.S.)                  | 2104-64-5   | Gammarus<br>fasciatus | 36 | 61.600  | 128.121 | 4.028  | -2.928 | 14.724 | 1.899 | 4.677  |
| 498 | Heptachlor (Cancelled in U.S.)           | 76-44-8     | Gammarus<br>fasciatus | 22 | 0.000   | 0.000   | 5.094  | -2.404 | 21.664 | 2.137 | 4.110  |
| 499 | Methoxychlor                             | 72-43-5     | Gammarus              | 36 | 18.460  | 0.000   | 5.206  | -3.347 | 15.740 | 1.991 | 5.260  |

|     |                                   |           |                       |    |         |         |        |        |        |       |        |
|-----|-----------------------------------|-----------|-----------------------|----|---------|---------|--------|--------|--------|-------|--------|
| 500 | Mevinphos                         | 7786-34-7 | fasciatus<br>Gammarus | 27 | 71.060  | 13.792  | 1.481  | -1.904 | 15.075 | 3.964 | 4.903  |
| 501 | Monocrotophos (Cancelled in U.S.) | 6923-22-4 | fasciatus<br>Gammarus | 28 | 77.350  | 7.823   | 1.894  | -1.904 | 14.932 | 3.964 | 2.934  |
| 502 | Picloram                          | 1918-02-1 | fasciatus<br>Gammarus | 16 | 76.210  | 5.969   | 2.322  | -1.708 | 18.341 | 2.701 | 0.951  |
| 503 | Tetraethyl pyrophosphate (TEPP)   | 107-49-3  | fasciatus             | 37 | 80.290  | 15.645  | 3.365  | -1.924 | 15.884 | 4.649 | 3.140  |
| 504 | Dieldrin (Cancelled in U.S.)      | 60-57-1   | Penaeus duorarum      | 27 | 12.530  | 0.000   | 4.481  | -2.683 | 19.624 | 1.758 | 6.104  |
| 505 | Dinoseb acid (Cancelled in U.S.)  | 88-85-7   | Penaeus duorarum      | 29 | 106.510 | 5.687   | 2.722  | -2.404 | 13.419 | 2.818 | 2.088  |
| 506 | EPN (Cancelled in U.S.)           | 2104-64-5 | Penaeus duorarum      | 36 | 61.600  | 128.121 | 4.028  | -2.928 | 14.724 | 1.899 | 6.047  |
| 507 | Glyphosine (Polaris formula)      | 2439-99-8 | Penaeus duorarum      | 26 | 155.600 | 21.161  | -1.357 | -1.042 | 16.799 | 4.322 | 0.015  |
| 508 | Heptachlor (Cancelled in U.S.)    | 76-44-8   | Penaeus duorarum      | 22 | 0.000   | 0.000   | 5.094  | -2.404 | 21.664 | 2.137 | 7.095  |
| 509 | MCPA acid                         | 94-74-6   | Penaeus duorarum      | 22 | 46.530  | 5.969   | 2.112  | -2.562 | 14.735 | 2.254 | -0.071 |
| 510 | Phorate                           | 298-02-2  | Penaeus duorarum      | 31 | 18.460  | 95.383  | 4.111  | -1.993 | 18.712 | 3.764 | 6.374  |
| 511 | Trichlorfon                       | 52-68-6   | Penaeus duorarum      | 20 | 55.760  | 7.596   | 2.161  | -1.195 | 20.781 | 4.527 | 5.854  |

**Table S2:** Data set used in ISC QSAAR modeling

| S.No. | Chemical name                                 | CAS No.     | Taxonomic name      | LogP  | pEC <sub>50</sub> (mM)<br>(Daphnia magna) | pLC <sub>50</sub><br>(mM) |
|-------|-----------------------------------------------|-------------|---------------------|-------|-------------------------------------------|---------------------------|
| 1     | (S)-Dimethenamid                              | 163515-14-8 | Lepomis macrochirus | 2.972 | 1.361                                     | 1.441                     |
| 2     | 1,2-Benzisothiazolin-3-one                    | 2634-33-5   | Lepomis macrochirus | 1.108 | 2.138                                     | 2.447                     |
| 3     | 1,2-Benzisothiazolin-3-one, 2-butyl           | 4299-07-4   | Lepomis macrochirus | 2.863 | 3.330                                     | 2.584                     |
| 4     | 1,3 Dichloropropene (Telone soil fumigant)    | 542-75-6    | Lepomis macrochirus | 1.978 | 3.091                                     | 1.477                     |
| 5     | 1,3,5-Triethylhexahydro-s-triazine, VancideTH | 7779-27-3   | Lepomis macrochirus | 0.838 | 1.049                                     | 0.745                     |
| 6     | 1,4-Bis(bromoacetoxy)-2-butene (BBAB)         | 20679-58-7  | Lepomis macrochirus | 1.419 | 3.372                                     | 3.763                     |

|    |                                                       |             |                     |       |        |        |
|----|-------------------------------------------------------|-------------|---------------------|-------|--------|--------|
| 7  | 2,4-D Acid                                            | 94-75-7     | Lepomis macrochirus | 2.457 | 0.947  | 0.089  |
| 8  | 2,4-D Butoxyethanol Ester                             | 1929-73-3   | Lepomis macrochirus | 3.732 | 2.276  | 2.721  |
| 9  | 2,4-D Isopropyl Ester                                 | 94-11-1     | Lepomis macrochirus | 3.324 | 2.005  | 2.929  |
| 10 | 2,4-D Propylene Glycol B.E. Ester                     | 1320-18-9   | Lepomis macrochirus | 4.121 | 2.446  | 2.777  |
| 11 | 2,4-DB Acid                                           | 94-82-6     | Lepomis macrochirus | 3.237 | 0.993  | 1.521  |
| 12 | 2,4-DP 2-Butoxyethyl Ester<br>Weedone formula         | 53404-31-2  | Lepomis macrochirus | 4.121 | 4.729  | 2.605  |
| 13 | 2-Benzyl-4-chlorophenol<br>(Nipacide BCP)             | 120-32-1    | Lepomis macrochirus | 3.636 | 2.569  | 2.821  |
| 14 | 2-Bromo-4'-hydroxyacetophenone<br>(BHAP)              | 2491-38-5   | Lepomis macrochirus | 1.97  | 1.500  | 1.961  |
| 15 | 2-EEEBC (Debacarb)                                    | 62732-91-6  | Lepomis macrochirus | 1.683 | -0.964 | -0.378 |
| 16 | 2-Hydroxyacetophenone<br>2-Hydroxyethyl octyl sulfide | 118-93-4    | Lepomis macrochirus | 0.862 | 0.456  | 0.073  |
| 17 | MGK 874 repellent<br>2-Hydroxypropyl                  | 3547-33-9   | Lepomis macrochirus | 3.072 | 2.711  | 1.832  |
| 18 | methanethiosulfonate(HPMTS)                           | 30388-01-3  | Lepomis macrochirus | 0.06  | 1.152  | 0.649  |
| 19 | 3,5 Dimethyl-1-<br>(hydroxymethyl)pyrazole            | 85264-33-1  | Lepomis macrochirus | 0.45  | 0.600  | 0.209  |
| 20 | 3-Iodo-2-propynyl butyl<br>carbamate (IPBC)           | 55406-53-6  | Lepomis macrochirus | 1.909 | 3.245  | 3.095  |
| 21 | 4,4-Dimethyloxazolidine                               | 51200-87-4  | Lepomis macrochirus | 0.342 | 0.352  | 0.234  |
| 22 | 4,5-Dichloro-2-n-octyl-3(2H)-<br>isothiazolone        | 64359-81-5  | Lepomis macrochirus | 3.709 | 4.733  | 4.304  |
| 23 | 4-Chloro-3,5-xyleneol (Ottasept))                     | 88-04-0     | Lepomis macrochirus | 2.662 | 1.763  | 1.991  |
| 24 | Acetochlor WF2061 formulation                         | 34256-82-1  | Lepomis macrochirus | 3.123 | 1.574  | 2.317  |
| 25 | Acibenzolar-s-methyl                                  | 135158-54-2 | Lepomis macrochirus | 2.195 | 1.860  | 2.119  |
| 26 | Aldicarb                                              | 116-06-3    | Lepomis macrochirus | 1.47  | 2.666  | 3.478  |
| 27 | Aldoxycarb                                            | 1646-88-4   | Lepomis macrochirus | 0.151 | 2.900  | 0.623  |
| 28 | Ametryn                                               | 834-12-8    | Lepomis macrochirus | 1.846 | 0.909  | 1.788  |
| 29 | Amitraz                                               | 33089-61-1  | Lepomis macrochirus | 4.872 | 1.939  | 2.936  |
| 30 | Anilazine                                             | 101-05-3    | Lepomis macrochirus | 3.575 | 2.463  | 2.935  |
| 31 | Aspon (Ortho Sod-Cancelled in<br>U.S.)                | 3244-90-4   | Lepomis macrochirus | 5.924 | 5.758  | 3.578  |

|    |                                               |             |                     |        |       |       |
|----|-----------------------------------------------|-------------|---------------------|--------|-------|-------|
| 32 | Atrazine                                      | 1912-24-9   | Lepomis macrochirus | 1.777  | 1.495 | 1.508 |
| 33 | Azadirachtin                                  | 108168-76-9 | Lepomis macrochirus | 0.942  | 1.889 | 1.290 |
| 34 | Azinphos-methyl                               | 86-50-0     | Lepomis macrochirus | 2.382  | 5.448 | 4.889 |
| 35 | Azoxystrobin                                  | 131860-33-8 | Lepomis macrochirus | 4.093  | 3.192 | 2.564 |
| 36 | BCDM Hydantoin, 1-bromo-3-chloro-5,5-dimethyl | 16079-88-2  | Lepomis macrochirus | 1.493  | 2.650 | 2.827 |
| 37 | Bendiocarb                                    | 22781-23-3  | Lepomis macrochirus | 1.912  | 3.883 | 2.677 |
| 38 | Benfluralin Balan EC formulation              | 1861-40-1   | Lepomis macrochirus | 4.148  | 2.186 | 3.712 |
| 39 | Benomyl 50WP formulation                      | 17804-35-2  | Lepomis macrochirus | 2.572  | 3.329 | 3.040 |
| 40 | Bensulide                                     | 741-58-2    | Lepomis macrochirus | 4.423  | 2.836 | 2.691 |
| 41 | Benzyl bromoacetate                           | 5437-45-6   | Lepomis macrochirus | 2.125  | 2.998 | 3.307 |
| 42 | Bethoxazin BTCN metabolite (Canceled in U.S.) | 163269-30-5 | Lepomis macrochirus | 2.94   | 2.196 | 2.157 |
| 43 | Bifenazate                                    | 149877-41-8 | Lepomis macrochirus | 3.824  | 2.779 | 2.714 |
| 44 | Bifenthrin                                    | 82657-04-3  | Lepomis macrochirus | 6.662  | 5.422 | 6.090 |
| 45 | Bioresmethrin                                 | 28434-01-7  | Lepomis macrochirus | 5.152  | 5.626 | 5.626 |
| 46 | Bis (3-aminopropyl)dodecylamine)              |             |                     |        |       |       |
| 46 | Lonzabac 12                                   | 2372-82-9   | Lepomis macrochirus | 3.907  | 3.613 | 2.823 |
| 47 | Bis (trichloromethyl) sulfone                 | 3064-70-8   | Lepomis macrochirus | 3.057  | 3.240 | 3.715 |
| 48 | Bitertanol                                    | 55179-31-2  | Lepomis macrochirus | 3.93   | 1.856 | 2.206 |
| 49 | Brodifacoum                                   | 56073-10-0  | Lepomis macrochirus | 7.79   | 2.728 | 3.640 |
| 50 | Bromacil                                      | 314-40-9    | Lepomis macrochirus | 1.097  | 0.334 | 0.313 |
| 51 | Bromadiolone                                  | 28772-56-7  | Lepomis macrochirus | 7.184  | 3.342 | 2.245 |
| 52 | Bromonitrostyrene                             | 7166-19-0   | Lepomis macrochirus | 2.657  | 3.978 | 4.128 |
| 53 | Bromoxynil AXF 1240 formulation               | 1689-84-5   | Lepomis macrochirus | 2.789  | 0.573 | 1.081 |
| 54 | Bromoxynil butyrate                           | 3861-41-4   | Lepomis macrochirus | 3.789  | 3.239 | 3.888 |
| 55 | Bromoxynil heptanoate                         | 56634-95-8  | Lepomis macrochirus | 4.959  | 4.099 | 4.128 |
| 56 | Bromoxynil octanoate                          | 1689-99-2   | Lepomis macrochirus | 5.349  | 3.549 | 3.835 |
| 57 | Bromuconazole (EXP 10064)                     | 116255-48-2 | Lepomis macrochirus | 3.664  | 3.647 | 1.953 |
| 58 | Bronopol                                      | 52-51-7     | Lepomis macrochirus | -0.661 | 2.097 | 1.253 |

|    |                                       |             |                     |        |       |        |
|----|---------------------------------------|-------------|---------------------|--------|-------|--------|
| 59 | Butralin                              | 33629-47-9  | Lepomis macrochirus | 4.011  | 3.391 | 2.470  |
| 60 | Butylate                              | 2008-41-5   | Lepomis macrochirus | 3.372  | 1.233 | 2.986  |
| 61 | Cadusafos                             | 95465-99-9  | Lepomis macrochirus | 5.194  | 5.172 | 3.199  |
| 62 | Carbofuran                            | 1563-66-2   | Lepomis macrochirus | 2.118  | 3.882 | 2.532  |
| 63 | Carboxin                              | 5234-68-4   | Lepomis macrochirus | 2.62   | 0.445 | 2.292  |
| 64 | Chlorethoxyfos                        | 54593-83-8  | Lepomis macrochirus | 4.619  | 5.914 | 5.165  |
| 65 | Chlorfenapyr                          | 122453-73-0 | Lepomis macrochirus | 5.455  | 4.718 | 4.546  |
| 66 | Chlorflurenol methyl ester            | 37339-61-0  | Lepomis macrochirus | 2.729  | 1.564 | 2.108  |
| 67 | Chloroneb                             | 2675-77-6   | Lepomis macrochirus | 3.011  | 1.524 | 1.626  |
| 68 | Chlorophacinone                       | 3691-35-8   | Lepomis macrochirus | 4.736  | 2.944 | 2.734  |
| 69 | Chloropicrin                          | 76-06-2     | Lepomis macrochirus | 1.591  | 3.137 | 3.571  |
| 70 | Chlorothalonil(Degradate)             | 1897-45-6   | Lepomis macrochirus | 4.044  | 1.010 | 1.221  |
| 71 | Chlorpropham                          | 101-21-3    | Lepomis macrochirus | 3.297  | 1.762 | 1.497  |
| 72 | Chlorpyrifos                          | 2921-88-2   | Lepomis macrochirus | 5.101  | 6.545 | 5.431  |
| 73 | Chromic acid                          | 7738-94-5   | Lepomis macrochirus | -1.354 | 2.191 | 0.428  |
| 74 | Cinnamaldehyde                        | 104-55-2    | Lepomis macrochirus | 1.899  | 1.273 | 1.645  |
| 75 | Clomazone                             | 81777-89-1  | Lepomis macrochirus | 2.64   | 1.664 | 0.848  |
| 76 | Cyanamide (Alzodef)                   | 420-04-2    | Lepomis macrochirus | -0.574 | 0.798 | -0.321 |
| 77 | Cyanazine                             | 21725-46-2  | Lepomis macrochirus | 1.671  | 0.758 | 1.029  |
| 78 | Cyfluthrin (Tempo 2EC<br>Formulation) | 68359-37-5  | Lepomis macrochirus | 6.317  | 7.240 | 5.698  |
| 79 | Cyhalothrin                           | 68085-85-8  | Lepomis macrochirus | 6.544  | 6.073 | 5.990  |
| 80 | Cyhexatin                             | 13121-70-5  | Lepomis macrochirus | 5.927  | 6.355 | 5.017  |
| 81 | Cymoxanil                             | 57966-95-7  | Lepomis macrochirus | -0.642 | 2.394 | 0.835  |
| 82 | Cypermethrin Beta                     | 52315-07-8  | Lepomis macrochirus | 6.178  | 5.996 | 5.540  |
| 83 | Cyproconazole                         | 94361-06-5  | Lepomis macrochirus | 2.865  | 1.050 | 1.143  |
| 84 | Cyprodinil                            | 121552-61-2 | Lepomis macrochirus | 3.406  | 3.848 | 2.014  |
| 85 | Daminozide                            | 1596-84-5   | Lepomis macrochirus | -0.556 | 0.211 | -0.422 |
| 86 | Dazomet                               | 533-74-4    | Lepomis macrochirus | 0.797  | 2.692 | 2.733  |
| 87 | DBDMH Glybrom formulation             | 77-48-5     | Lepomis macrochirus | 1.649  | 2.532 | 3.025  |
| 88 | DBNPA                                 | 10222-01-2  | Lepomis macrochirus | 0.481  | 2.449 | 2.270  |

|     |                                              |             |                     |       |       |       |
|-----|----------------------------------------------|-------------|---------------------|-------|-------|-------|
| 89  | DCDMH (Dantochlor Formulation)               | 118-52-5    | Lepomis macrochirus | 1.337 | 2.622 | 1.927 |
| 90  | DDT (Cancelled in U.S.)                      | 50-29-3     | Lepomis macrochirus | 6.496 | 4.878 | 5.345 |
| 91  | Decanol (Alfol 810 alcohol)                  | 112-30-1    | Lepomis macrochirus | 3.119 | 1.386 | 1.496 |
| 92  | Deltamethrin                                 | 52918-63-5  | Lepomis macrochirus | 6.49  | 6.662 | 6.147 |
| 93  | Desmedipham                                  | 13684-56-5  | Lepomis macrochirus | 3.866 | 2.203 | 1.699 |
| 94  | Diazinon                                     | 333-41-5    | Lepomis macrochirus | 3.968 | 5.766 | 3.524 |
| 95  | Dibromodicyanobutane                         | 35691-65-7  | Lepomis macrochirus | 2.546 | 2.082 | 1.812 |
| 96  | Dicamba                                      | 1918-00-9   | Lepomis macrochirus | 2.7   | 0.300 | 0.213 |
| 97  | Dichlobenil                                  | 1194-65-6   | Lepomis macrochirus | 2.865 | 1.443 | 1.408 |
| 98  | Dichlorprop (2,4-DP) Weedone formulation     | 120-36-5    | Lepomis macrochirus | 2.845 | 4.647 | 2.452 |
| 99  | Dichlorvos in Muscalure Z-9 formulation      | 62-73-7     | Lepomis macrochirus | 2.68  | 2.311 | 2.425 |
| 100 | Diclofop-methyl                              | 51338-27-3  | Lepomis macrochirus | 4.726 | 3.171 | 3.357 |
| 101 | Dicloran (DCNA)                              | 99-30-9     | Lepomis macrochirus | 2.484 | 2.000 | 2.283 |
| 102 | Dienochlor                                   | 2227-17-0   | Lepomis macrochirus | 7.726 | 2.597 | 2.898 |
| 103 | Difenoconazole                               | 119446-68-3 | Lepomis macrochirus | 4.666 | 2.722 | 2.530 |
| 104 | Difethialone                                 | 104653-34-1 | Lepomis macrochirus | 8.259 | 5.089 | 3.857 |
| 105 | Diiodomethyl p-tolyl sulfone (Amical 48)     | 20018-09-1  | Lepomis macrochirus | 2.922 | 3.774 | 2.750 |
| 106 | Dimethenamid                                 | 87674-68-8  | Lepomis macrochirus | 2.972 | 1.236 | 1.634 |
| 107 | Dimethepin (Harvade 25F formulation)         | 55290-64-7  | Lepomis macrochirus | 0.081 | 1.503 | 1.003 |
| 108 | Dinitramine                                  | 29091-05-2  | Lepomis macrochirus | 2.95  | 2.394 | 1.752 |
| 109 | Dinocap                                      | 39300-45-3  | Lepomis macrochirus | 5.058 | 4.938 | 4.261 |
| 110 | Diphacinone                                  | 82-66-6     | Lepomis macrochirus | 4.083 | 2.277 | 1.651 |
| 111 | Diphenamid                                   | 957-51-7    | Lepomis macrochirus | 2.907 | 0.616 | 0.566 |
| 112 | Dipropyl isocinchomeronate MGK 326 repellent | 136-45-8    | Lepomis macrochirus | 2.215 | 1.145 | 2.757 |
| 113 | Disulfoton                                   | 298-04-4    | Lepomis macrochirus | 4.421 | 4.324 | 3.847 |
| 114 | Dithiopyr Dimension formulation              | 97886-45-8  | Lepomis macrochirus | 5.243 | 1.888 | 2.931 |
| 115 | Diuron Karmex DF Formulation                 | 330-54-1    | Lepomis macrochirus | 3.087 | 1.443 | 1.920 |



|     |                                             |             |                     |        |       |       |
|-----|---------------------------------------------|-------------|---------------------|--------|-------|-------|
| 116 | D-Phenothrin (Sumithrin)                    | 26002-80-2  | Lepomis macrochirus | 5.761  | 4.901 | 4.346 |
| 117 | DTEA                                        | 36362-09-1  | Lepomis macrochirus | 3.819  | 3.781 | 2.492 |
| 118 | d-trans-Allethrin                           | 584-79-2    | Lepomis macrochirus | 4.002  | 4.531 | 4.128 |
| 119 | Endothall                                   | 145-73-3    | Lepomis macrochirus | -0.051 | 0.758 | 1.636 |
| 120 | Esfenvalerate<br>Ethalfluralin Sonalan EC   | 66230-04-4  | Lepomis macrochirus | 6.68   | 6.447 | 6.261 |
| 121 | formulation                                 | 55283-68-6  | Lepomis macrochirus | 3.924  | 4.265 | 4.018 |
| 122 | Ethephon                                    | 16672-87-0  | Lepomis macrochirus | 0.403  | 0.659 | 0.099 |
| 123 | Ethofenprox                                 | 80844-07-1  | Lepomis macrochirus | 6.372  | 5.820 | 5.203 |
| 124 | Ethofumesate                                | 26225-79-6  | Lepomis macrochirus | 2.058  | 0.651 | 2.059 |
| 125 | Ethoprop<br>Ethyl N,N-dipropylthiocarbamate | 13194-48-4  | Lepomis macrochirus | 4.417  | 3.753 | 2.907 |
| 126 | (EPTC)                                      | 759-94-4    | Lepomis macrochirus | 2.982  | 1.128 | 1.131 |
| 127 | Famoxadone<br>Fenamidone(RPA413255 s-       | 131807-57-3 | Lepomis macrochirus | 4.7    | 4.501 | 4.459 |
| 128 | enantiomer)<br>Fenamiphos Nemacur 3         | 161326-34-7 | Lepomis macrochirus | 3.49   | 1.507 | 2.624 |
| 129 | formulation                                 | 22224-92-6  | Lepomis macrochirus | 4.238  | 5.368 | 4.834 |
| 130 | Fenarimol                                   | 60168-88-9  | Lepomis macrochirus | 4.068  | 1.688 | 2.566 |
| 131 | Fenazaquin                                  | 120928-09-8 | Lepomis macrochirus | 4.549  | 4.738 | 3.954 |
| 132 | Fenbuconazole                               | 114369-43-6 | Lepomis macrochirus | 4.026  | 2.166 | 2.695 |
| 133 | Fenbutatin oxide                            | 13356-08-6  | Lepomis macrochirus | 16.761 | 4.531 | 5.341 |
| 134 | Fenhexamid                                  | 126833-17-8 | Lepomis macrochirus | 4.608  | 0.459 | 1.946 |
| 135 | Fenoxaprop-ethyl                            | 66441-23-4  | Lepomis macrochirus | 4.604  | 2.056 | 3.067 |
| 136 | Fenoxycarb                                  | 72490-01-8  | Lepomis macrochirus | 3.604  | 2.877 | 2.610 |
| 137 | Fenpropathrin                               | 39515-41-8  | Lepomis macrochirus | 5.269  | 5.819 | 5.201 |
| 138 | Fenpyroximate FujiMite 5EC                  | 134098-61-6 | Lepomis macrochirus | 5.027  | 5.421 | 5.324 |
| 139 | Fenvalerate                                 | 51630-58-1  | Lepomis macrochirus | 6.68   | 6.924 | 6.000 |
| 140 | Fipronil MB 46136 metabolite                | 120068-37-3 | Lepomis macrochirus | 4.877  | 4.178 | 4.340 |
| 141 | Fluazifop-butyl (PP009)                     | 69806-50-4  | Lepomis macrochirus | 5.003  | 1.804 | 2.859 |
| 142 | Fluazinam                                   | 79622-59-6  | Lepomis macrochirus | 5.986  | 3.412 | 3.946 |
| 143 | Fludioxonil(Maxim 4FS)                      | 131341-86-1 | Lepomis macrochirus | 2.393  | 2.441 | 2.531 |

|     |                                           |             |                     |        |       |        |
|-----|-------------------------------------------|-------------|---------------------|--------|-------|--------|
| 144 | Fluometuron                               | 2164-17-2   | Lepomis macrochirus | 2.799  | 1.370 | 1.236  |
| 145 | Fluoxastrobin                             | 361377-29-9 | Lepomis macrochirus | 4.565  | 2.980 | 2.675  |
| 146 | Fluridone                                 | 59756-60-4  | Lepomis macrochirus | 4.738  | 2.040 | 1.705  |
| 147 | Flurprimidol                              | 56425-91-3  | Lepomis macrochirus | 3.267  | 1.482 | 1.312  |
| 148 | Flutriafol 125 g/L SC formulation         | 76674-21-0  | Lepomis macrochirus | 2.492  | 1.631 | 0.960  |
| 149 | Fluvalinate                               | 69409-94-5  | Lepomis macrochirus | 7.396  | 6.099 | 5.916  |
| 150 | Fluxapyroxad                              | 907204-31-3 | Lepomis macrochirus | 4.694  | 1.750 | 2.521  |
| 151 | Folpet                                    | 133-07-3    | Lepomis macrochirus | 3.259  | 2.735 | 3.800  |
| 152 | Fonofos                                   | 944-22-9    | Lepomis macrochirus | 4.528  | 5.082 | 4.559  |
| 153 | Forchlorfenuron                           | 68157-60-8  | Lepomis macrochirus | 3.379  | 1.670 | 1.449  |
| 154 | Fosthiazate                               | 98886-44-3  | Lepomis macrochirus | 3.832  | 3.037 | 1.643  |
| 155 | Furfural                                  | 98-01-1     | Lepomis macrochirus | 1.092  | 0.673 | 1.219  |
| 156 | Gamma cyhalothrin                         | 76703-62-3  | Lepomis macrochirus | 6.544  | 7.000 | 7.197  |
| 157 | Glutaraldehyde                            | 111-30-8    | Lepomis macrochirus | 0.554  | 2.125 | 0.914  |
| 158 | Glyphosate N-(phosphonomethyl) glycine    | 1071-83-6   | Lepomis macrochirus | -1.204 | 0.101 | 0.575  |
| 159 | Grotan                                    | 4719-04-4   | Lepomis macrochirus | -2.245 | 0.924 | 0.750  |
| 160 | Hexaconazole JF 9445 formulation - test 1 | 79983-71-4  | Lepomis macrochirus | 3.663  | 2.218 | 1.790  |
| 161 | Hexazinone                                | 51235-04-2  | Lepomis macrochirus | 0.513  | 0.473 | 0.025  |
| 162 | Hexythiazox PT-1-9                        | 78587-05-0  | Lepomis macrochirus | 4.981  | 1.652 | 2.823  |
| 163 | Hydramethylnon                            | 67485-29-4  | Lepomis macrochirus | 6.382  | 2.637 | 2.464  |
| 164 | Imazalil                                  | 35554-44-0  | Lepomis macrochirus | 4.134  | 1.973 | 1.872  |
| 165 | Imazamethabenz                            | 81405-85-8  | Lepomis macrochirus | 2.073  | 0.117 | -0.163 |
| 166 | Imazaquin                                 | 81335-37-7  | Lepomis macrochirus | 2.224  | 0.046 | -0.130 |
| 167 | Imiprothrin (Pralle)                      | 72963-72-5  | Lepomis macrochirus | 1.623  | 3.795 | 3.658  |
| 168 | Iprodione                                 | 36734-19-7  | Lepomis macrochirus | 2.88   | 3.139 | 1.951  |
| 169 | Irgarol                                   | 28159-98-0  | Lepomis macrochirus | 2.378  | 1.679 | 1.989  |
| 170 | Isazophos methyl Triumph 4E formulation   | 42509-83-1  | Lepomis macrochirus | 2.791  | 5.113 | 4.873  |
| 171 | Kepone (Cancelled in U.S.)                | 143-50-0    | Lepomis macrochirus | 4.823  | 3.276 | 3.833  |
| 172 | Kresoxim methyl                           | 143390-89-0 | Lepomis macrochirus | 2.611  | 2.975 | 2.798  |

|     |                                                 |             |                     |        |        |        |
|-----|-------------------------------------------------|-------------|---------------------|--------|--------|--------|
| 173 | Lactofen                                        | 77501-63-4  | Lepomis macrochirus | 5.168  | 2.363  | 2.342  |
| 174 | Lambda-Cyhalothrin                              | 91465-08-6  | Lepomis macrochirus | 6.544  | 7.051  | 6.628  |
| 175 | Linuron                                         | 330-55-2    | Lepomis macrochirus | 3.019  | 3.317  | 1.433  |
| 176 | L-Lactic acid                                   | 79-33-4     | Lepomis macrochirus | -0.548 | -0.920 | -0.159 |
| 177 | Malathion                                       | 121-75-5    | Lepomis macrochirus | 2.505  | 5.519  | 4.218  |
| 178 | Maleic hydrazide                                | 123-33-1    | Lepomis macrochirus | -1.901 | 0.018  | -1.157 |
| 179 | MCPA 2-ethylhexyl ester                         | 29450-45-1  | Lepomis macrochirus | 4.787  | 3.048  | 1.990  |
| 180 | Metalaxyl Ridomil 2E-G                          | 57837-19-1  | Lepomis macrochirus | 1.844  | 1.349  | 1.015  |
| 181 | Methiocarb                                      | 2032-65-7   | Lepomis macrochirus | 2.744  | 4.074  | 3.031  |
| 182 | Methomyl                                        | 16752-77-5  | Lepomis macrochirus | 1.039  | 4.266  | 2.642  |
| 183 | Methoprene                                      | 40596-69-8  | Lepomis macrochirus | 5.062  | 2.543  | 2.310  |
| 184 | Methyl anthralinate                             | 134-20-3    | Lepomis macrochirus | 1.055  | 0.919  | 1.219  |
| 185 | Methyl chloroform                               | 71-55-6     | Lepomis macrochirus | 2.377  | 1.076  | 0.362  |
| 186 | Methyl isothiocyanate                           | 556-61-6    | Lepomis macrochirus | 0.719  | 2.983  | 2.785  |
| 187 | Methyl nonyl ketone                             | 112-12-9    | Lepomis macrochirus | 3.716  | 2.499  | 1.909  |
| 188 | Methylene bis(thiocyanate) Slime-<br>trol RX32  | 6317-18-6   | Lepomis macrochirus | 1.372  | 1.569  | 1.862  |
| 189 | Metolachlor CGA-51502                           | 51218-45-2  | Lepomis macrochirus | 3.164  | 1.265  | 1.453  |
| 190 | Metribuzin                                      | 21087-64-9  | Lepomis macrochirus | 0.372  | 1.710  | 0.450  |
| 191 | Mexacarbate (Zectran)                           | 315-18-4    | Lepomis macrochirus | 2.088  | 3.734  | 1.713  |
| 192 | MGK-264                                         | 113-48-4    | Lepomis macrochirus | 3.006  | 2.078  | 2.060  |
| 193 | Myclobutanil                                    | 88671-89-0  | Lepomis macrochirus | 3.583  | 1.419  | 2.080  |
| 194 | Naphthalene                                     | 91-20-3     | Lepomis macrochirus | 2.84   | 1.904  | 1.603  |
| 195 | Naphthaleneacetate acid ethyl<br>ester          | 2122-70-5   | Lepomis macrochirus | 2.945  | 0.954  | 1.903  |
| 196 | Naphthaleneacetic acid                          | 86-87-3     | Lepomis macrochirus | 2.467  | 0.015  | 0.895  |
| 197 | Napropamide                                     | 15299-99-7  | Lepomis macrochirus | 3.476  | 1.278  | 1.354  |
| 198 | Niclosamide                                     | 1420-04-8   | Lepomis macrochirus | 3.86   | 3.214  | 3.333  |
| 199 | Nitrapyrin                                      | 1929-82-4   | Lepomis macrochirus | 3.562  | 2.021  | 1.832  |
| 200 | N-Methyl-2-pyrrolidine<br>N-methylneodecanamide | 120-94-5    | Lepomis macrochirus | 0.712  | -1.769 | -0.990 |
| 201 | (MNDA)                                          | 105726-67-8 | Lepomis macrochirus | 2.729  | 0.154  | 0.314  |

|     |                                            |             |                     |        |        |       |
|-----|--------------------------------------------|-------------|---------------------|--------|--------|-------|
| 202 | OBPA                                       | 58-36-6     | Lepomis macrochirus | 2.826  | 5.020  | 4.798 |
| 203 | Octhilinone                                | 26530-20-1  | Lepomis macrochirus | 2.576  | 3.300  | 3.125 |
| 204 | Ortho-phenyl phenol                        | 90-43-7     | Lepomis macrochirus | 3.059  | 1.831  | 1.761 |
| 205 | Oryzalin                                   | 19044-88-3  | Lepomis macrochirus | 1.777  | 2.363  | 2.080 |
| 206 | Oxadiazon                                  | 19666-30-9  | Lepomis macrochirus | 4.217  | 2.814  | 2.594 |
| 207 | Oxamyl                                     | 23135-22-0  | Lepomis macrochirus | 0.107  | 2.669  | 1.593 |
| 208 | Oxazolidine E                              | 7747-35-5   | Lepomis macrochirus | 0.413  | 0.533  | 0.042 |
| 209 | Oxycarboxin                                | 5259-88-1   | Lepomis macrochirus | 1.302  | 0.588  | 0.978 |
| 210 | Oxydemeton-methyl                          | 301-12-2    | Lepomis macrochirus | 2.487  | 3.187  | 2.305 |
| 211 | Oxyfluorfen                                | 42874-03-3  | Lepomis macrochirus | 5.458  | 3.655  | 3.257 |
| 212 | Oxythioquinox                              | 2439-01-2   | Lepomis macrochirus | 2.575  | 3.291  | 3.846 |
| 213 | Paclbutrazol                               | 76738-62-0  | Lepomis macrochirus | 3.122  | 0.947  | 1.095 |
| 214 | Paranitrophenol                            | 100-02-7    | Lepomis macrochirus | 1.3    | 1.365  | 1.324 |
| 215 | Parathion 8E Formulation                   | 56-38-2     | Lepomis macrochirus | 3.654  | 4.987  | 4.209 |
| 216 | Pebulate                                   | 1114-71-2   | Lepomis macrochirus | 3.372  | 1.474  | 1.411 |
| 217 | Pendimethalin                              | 40487-42-1  | Lepomis macrochirus | 3.72   | 3.002  | 3.150 |
| 218 | Pentachloronitrobenzene (PCNB)             | 82-68-8     | Lepomis macrochirus | 4.862  | 2.584  | 3.470 |
| 219 | Pentachlorophenol                          | 87-86-5     | Lepomis macrochirus | 4.659  | 2.295  | 3.647 |
| 220 | Permethrin 3.2 EC                          | 52645-53-1  | Lepomis macrochirus | 6.113  | 6.414  | 5.695 |
| 221 | Phenmedipham                               | 13684-63-4  | Lepomis macrochirus | 3.784  | 1.331  | 1.878 |
| 222 | Phenthoate (Cidial)                        | 2597-03-7   | Lepomis macrochirus | 3.924  | 5.227  | 4.987 |
| 223 | Phosalone                                  | 2310-17-0   | Lepomis macrochirus | 4.619  | 2.486  | 3.867 |
| 224 | Phosmet                                    | 732-11-6    | Lepomis macrochirus | 2.874  | 4.753  | 4.159 |
| 225 | Phosphoric acid Divosan X-Tend formulation | 7664-38-2   | Lepomis macrochirus | -0.929 | -0.030 | 0.213 |
| 226 | Picoxystrobin                              | 117428-22-5 | Lepomis macrochirus | 3.84   | 4.185  | 3.679 |
| 227 | Piperalin                                  | 3478-94-2   | Lepomis macrochirus | 4.415  | 2.242  | 2.632 |
| 228 | Piperonyl butoxide                         | 51-03-6     | Lepomis macrochirus | 3.718  | 2.822  | 1.927 |
| 229 | Prallethrin                                | 23031-36-9  | Lepomis macrochirus | 3.449  | 4.685  | 4.135 |
| 230 | Profenofos                                 | 41198-08-7  | Lepomis macrochirus | 5.769  | 5.604  | 4.294 |
| 231 | Prometon                                   | 1610-18-0   | Lepomis macrochirus | 1.521  | 0.943  | 1.162 |

|     |                                                                       |                          |                     |       |        |        |
|-----|-----------------------------------------------------------------------|--------------------------|---------------------|-------|--------|--------|
| 232 | Prometryn                                                             | 7287-19-6                | Lepomis macrochirus | 2.234 | 1.113  | 1.383  |
| 233 | Propargite                                                            | 2312-35-8                | Lepomis macrochirus | 4.517 | 3.675  | 4.053  |
| 234 | Propetamphos                                                          | 31218-83-4               | Lepomis macrochirus | 2.722 | 4.931  | 3.168  |
| 235 | Propiconazole Tilt 3.6 E                                              | 60207-90-1               | Lepomis macrochirus | 3.653 | 2.029  | 2.420  |
| 236 | Propionic acid<br>Prothioconazole (JAU 6476<br>Technical)             | 79-09-4<br>178928-70-6   | Lepomis macrochirus | 0.481 | 0.514  | -0.061 |
| 237 | Pyraclostrobin                                                        | 175013-18-0              | Lepomis macrochirus | 2.857 | 2.458  | 1.911  |
| 238 | Pyraflufen-ethyl                                                      | 129630-19-9              | Lepomis macrochirus | 4.239 | 4.393  | 4.532  |
| 239 | Pyrethrins                                                            | 8003-34-7                | Lepomis macrochirus | 4.076 | 2.735  | 2.098  |
| 240 | Pyridaben                                                             | 96489-71-3               | Lepomis macrochirus | 3.711 | 4.507  | 4.571  |
| 241 | Pyrimethanil (radiolabeled)                                           | 53112-28-0               | Lepomis macrochirus | 5.242 | 5.838  | 5.161  |
| 242 | Pyriproxyfen                                                          | 95737-68-1               | Lepomis macrochirus | 2.837 | 1.817  | 0.881  |
| 243 | Quinclorac                                                            | 84087-01-4               | Lepomis macrochirus | 4.72  | 2.905  | 1.736  |
| 244 | Quizalofop-ethyl                                                      | 76578-14-8               | Lepomis macrochirus | 3.24  | 0.910  | 0.884  |
| 245 | Resmethrin                                                            | 10453-86-8               | Lepomis macrochirus | 4.406 | 2.003  | 2.909  |
| 246 | Rotenone                                                              | 83-79-4                  | Lepomis macrochirus | 5.152 | 6.187  | 5.654  |
| 247 | Ryanodine Ryan 50 powder<br>Sethoxydim Poast Herbicide<br>formulation | 15662-33-6<br>74051-80-2 | Lepomis macrochirus | 3.703 | 5.028  | 4.856  |
| 248 | Simazine                                                              | 122-34-9                 | Lepomis macrochirus | -0.67 | 4.050  | 1.426  |
| 249 | S-Metolachlor                                                         | 87392-12-9               | Lepomis macrochirus | 4.502 | 2.100  | 2.311  |
| 250 | Strychnine                                                            | 57-24-9                  | Lepomis macrochirus | 1.389 | 2.263  | 1.100  |
| 251 | Sulfentrazone                                                         | 122836-35-5              | Lepomis macrochirus | 3.164 | 1.038  | 1.948  |
| 252 | Sulfotepp                                                             | 3689-24-5                | Lepomis macrochirus | 2.093 | 1.524  | 2.643  |
| 253 | TCMTB                                                                 | 21564-17-0               | Lepomis macrochirus | 2.416 | 0.807  | 0.616  |
| 254 | Tebuconazole                                                          | 107534-96-3              | Lepomis macrochirus | 4.364 | 5.110  | 2.952  |
| 255 | Tebufenozide                                                          | 112410-23-8              | Lepomis macrochirus | 3.56  | 4.015  | 4.436  |
| 256 | Tebufenpyrad                                                          | 119168-77-3              | Lepomis macrochirus | 3.342 | 2.029  | 1.732  |
| 257 | Tebuthiuron                                                           | 34014-18-1               | Lepomis macrochirus | 4.452 | 1.967  | 2.070  |
| 258 | Tefluthrin                                                            | 79538-32-2               | Lepomis macrochirus | 3.863 | 3.919  | 3.555  |
| 259 |                                                                       |                          |                     | 1.611 | -0.114 | 0.333  |
| 260 |                                                                       |                          |                     | 5.552 | 6.777  | 6.508  |

|     |                                               |             |                     |        |       |       |
|-----|-----------------------------------------------|-------------|---------------------|--------|-------|-------|
| 261 | Tepraloxydim (BAS 620 00 H)                   | 149979-41-9 | Lepomis macrochirus | 3.739  | 1.665 | 0.642 |
| 262 | Terbacil                                      | 5902-51-2   | Lepomis macrochirus | 0.772  | 0.523 | 0.323 |
| 263 | Terbufos                                      | 13071-79-9  | Lepomis macrochirus | 4.889  | 5.969 | 5.574 |
| 264 | Terbuthylazine                                | 5915-41-3   | Lepomis macrochirus | 2.167  | 1.035 | 1.486 |
| 265 | Terbutryn                                     | 886-50-0    | Lepomis macrochirus | 2.236  | 1.958 | 1.951 |
| 266 | Tetraconazole                                 | 112281-77-3 | Lepomis macrochirus | 4.243  | 2.151 | 1.985 |
| 267 | Tetrahydro-2(nitromethylene)-2H-1, 3-thiazine | 58842-20-9  | Lepomis macrochirus | 0.788  | 0.675 | 0.052 |
| 268 | Tetramethrin                                  | 7696-12-0   | Lepomis macrochirus | 2.965  | 3.867 | 4.319 |
| 269 | Thiabendazole                                 | 148-79-8    | Lepomis macrochirus | 2.204  | 2.812 | 1.158 |
| 270 | Thiacloprid                                   | 111988-49-9 | Lepomis macrochirus | 2.121  | 1.050 | 1.001 |
| 271 | Thiazopyr                                     | 117718-60-2 | Lepomis macrochirus | 4.517  | 1.813 | 2.054 |
| 272 | Thiobencarb                                   | 28249-77-6  | Lepomis macrochirus | 4.035  | 3.406 | 2.663 |
| 273 | Thiodicarb                                    | 59669-26-0  | Lepomis macrochirus | 2.601  | 4.118 | 2.470 |
| 274 | Thiophanate-methyl                            | 23564-05-8  | Lepomis macrochirus | 1.792  | 1.810 | 1.324 |
| 275 | Tolfenpyrad                                   | 129558-76-5 | Lepomis macrochirus | 4.667  | 5.584 | 5.611 |
| 276 | Tolylfluanid DMST metabolite                  | 66840-71-9  | Lepomis macrochirus | 1.213  | 0.838 | 0.751 |
| 277 | Toxaphene (Cancelled in U.S.)                 | 8001-35-2   | Lepomis macrochirus | 6.073  | 4.615 | 5.234 |
| 278 | Tralomethrin                                  | 66841-25-6  | Lepomis macrochirus | 7.461  | 7.232 | 5.376 |
| 279 | Triadimefon                                   | 43121-43-3  | Lepomis macrochirus | 3.124  | 2.230 | 1.468 |
| 280 | Triadimenol                                   | 55219-65-3  | Lepomis macrochirus | 2.916  | 2.073 | 1.295 |
| 281 | Triallate                                     | 2303-17-5   | Lepomis macrochirus | 4.844  | 3.525 | 2.370 |
| 282 | Triazamate                                    | 112143-82-5 | Lepomis macrochirus | 1.76   | 4.351 | 2.628 |
| 283 | Tributyltin fluoride(TBTF)                    | 1983-10-4   | Lepomis macrochirus | 5.302  | 6.096 | 4.922 |
| 284 | Tributyltin oxide                             | 56-35-9     | Lepomis macrochirus | 9.695  | 5.553 | 4.997 |
| 285 | Trichloromelamine                             | 7673-09-8   | Lepomis macrochirus | 1.569  | 2.282 | 1.707 |
| 286 | Trichloro-s-triazinetriene                    | 87-90-1     | Lepomis macrochirus | -0.823 | 3.136 | 3.065 |
| 287 | Triclopyr acid                                | 55335-06-3  | Lepomis macrochirus | 2.505  | 0.286 | 0.239 |
| 288 | Triclopyr butoxyethyl ester (Garlon 4)        | 64700-56-7  | Lepomis macrochirus | 3.781  | 3.008 | 2.996 |
| 289 | Tridiphane (DOWCO 356)                        | 58138-08-2  | Lepomis macrochirus | 4.979  | 3.108 | 2.938 |

|     |                                                |             |                     |       |        |       |
|-----|------------------------------------------------|-------------|---------------------|-------|--------|-------|
| 290 | Trifloxystrobin                                | 141517-21-7 | Lepomis macrochirus | 4.17  | 4.208  | 3.879 |
| 291 | Triforine                                      | 26644-46-2  | Lepomis macrochirus | 1.489 | 1.191  | 1.253 |
| 292 | Trimethacarb                                   | 2686-99-9   | Lepomis macrochirus | 2.33  | 4.031  | 1.809 |
| 293 | Vinclozolin                                    | 50471-44-8  | Lepomis macrochirus | 3.421 | 1.894  | 0.780 |
| 294 | Warfarin                                       | 81-81-2     | Lepomis macrochirus | 3.61  | 0.644  | 0.545 |
| 295 | (S)-Dimethenamid                               | 163515-14-8 | Oncorhynchus mykiss | 2.972 | 1.361  | 1.641 |
| 296 | 1,2-Benzenedicarboxaldehyde                    | 643-79-8    | Oncorhynchus mykiss | 1.312 | 3.188  | 3.827 |
| 297 | 1,2-Benzisothiazolin-3-one                     | 2634-33-5   | Oncorhynchus mykiss | 1.108 | 2.138  | 2.304 |
| 298 | 1,2-Benzisothiazolin-3-one, 2-butyl            | 4299-07-4   | Oncorhynchus mykiss | 2.863 | 3.330  | 3.094 |
| 299 | 1,3 Dichloropropene (Telone soil fumigant)     | 542-75-6    | Oncorhynchus mykiss | 1.978 | 3.091  | 2.051 |
| 300 | 1,3,5-Triethylhexahydro-s-triazine,VancideTH   | 7779-27-3   | Oncorhynchus mykiss | 0.838 | 1.049  | 0.866 |
| 301 | 2,4-D 2-EHE Selective Weed Killer              | 1928-43-4   | Oncorhynchus mykiss | 5.609 | 2.824  | 1.665 |
| 302 | 2,4-D Acid                                     | 94-75-7     | Oncorhynchus mykiss | 2.457 | 0.947  | 0.303 |
| 303 | 2,4-D Butoxyethanol Ester                      | 1929-73-3   | Oncorhynchus mykiss | 3.732 | 2.276  | 2.694 |
| 304 | 2,4-D Isopropyl Ester                          | 94-11-1     | Oncorhynchus mykiss | 3.324 | 2.005  | 2.581 |
| 305 | 2,4-D Propylene Glycol B.E. Ester              | 1320-18-9   | Oncorhynchus mykiss | 4.121 | 2.446  | 2.548 |
| 306 | 2,4-DB Acid                                    | 94-82-6     | Oncorhynchus mykiss | 3.237 | 0.993  | 2.095 |
| 307 | 2-Benzyl-4-chlorophenol (Nipacide BCP)         | 120-32-1    | Oncorhynchus mykiss | 3.636 | 2.569  | 2.482 |
| 308 | 2-Bromo-4'-hydroxyacetophenone (BHAP)          | 2491-38-5   | Oncorhynchus mykiss | 1.97  | 1.500  | 2.219 |
| 309 | 2-EEEBC (Debacarb)                             | 62732-91-6  | Oncorhynchus mykiss | 1.683 | -0.964 | 1.023 |
| 310 | 2-Hydroxyethyl octyl sulfide MGK 874 repellent | 3547-33-9   | Oncorhynchus mykiss | 3.072 | 2.711  | 1.817 |
| 311 | 2-Hydroxypropyl methanethiosulfonate(HPMTS)    | 30388-01-3  | Oncorhynchus mykiss | 0.06  | 1.152  | 0.784 |
| 312 | 2-Methyl Benzisothiazolone(MBIT)               | 2527-66-4   | Oncorhynchus mykiss | 1.6   | 2.254  | 2.838 |
| 313 | 3,5 Dimethyl-1-(hydroxymethyl)pyrazole         | 85264-33-1  | Oncorhynchus mykiss | 0.45  | 0.600  | 0.011 |

|     |                                               |             |                     |       |        |       |
|-----|-----------------------------------------------|-------------|---------------------|-------|--------|-------|
| 314 | 3-Iodo-2-propynyl butyl carbamate (IPBC)      | 55406-53-6  | Oncorhynchus mykiss | 1.909 | 3.245  | 3.623 |
| 315 | 4,4-Dimethyloxazolidine                       | 51200-87-4  | Oncorhynchus mykiss | 0.342 | 0.352  | 0.026 |
| 316 | 4,5-Dichloro-2-n-octyl-3(2H)-isothiazolone    | 64359-81-5  | Oncorhynchus mykiss | 3.709 | 4.733  | 5.019 |
| 317 | 4-Chloro-3,5-xylenol (Ottasept))              | 88-04-0     | Oncorhynchus mykiss | 2.662 | 1.763  | 2.639 |
| 318 | 4-Chloro-3-cresol                             | 59-50-7     | Oncorhynchus mykiss | 2.354 | 1.792  | 2.192 |
| 319 | Acetochlor WF2061 formulation                 | 34256-82-1  | Oncorhynchus mykiss | 3.123 | 1.574  | 2.851 |
| 320 | Acibenzolar-s-methyl                          | 135158-54-2 | Oncorhynchus mykiss | 2.195 | 1.860  | 2.378 |
| 321 | Alachlor                                      | 15972-60-8  | Oncorhynchus mykiss | 2.987 | 1.544  | 3.051 |
| 322 | Aldicarb                                      | 116-06-3    | Oncorhynchus mykiss | 1.47  | 2.666  | 2.531 |
| 323 | Ametryn                                       | 834-12-8    | Oncorhynchus mykiss | 1.846 | 0.909  | 1.852 |
| 324 | Aminocarb                                     | 2032-59-9   | Oncorhynchus mykiss | 1.779 | 4.620  | 2.742 |
| 325 | Aminocyclopyrachlor methyl ester              | 858954-83-3 | Oncorhynchus mykiss | 1.376 | 1.029  | 1.211 |
| 326 | Amitraz                                       | 33089-61-1  | Oncorhynchus mykiss | 4.872 | 1.939  | 2.598 |
| 327 | Anilazine                                     | 101-05-3    | Oncorhynchus mykiss | 3.575 | 2.463  | 3.294 |
| 328 | Aspon (Ortho Sod-Cancelled in U.S.)           | 3244-90-4   | Oncorhynchus mykiss | 5.924 | 5.758  | 3.697 |
| 329 | Atrazine                                      | 1912-24-9   | Oncorhynchus mykiss | 1.777 | 1.495  | 1.610 |
| 330 | Azinphos-methyl                               | 86-50-0     | Oncorhynchus mykiss | 2.382 | 5.448  | 4.557 |
| 331 | Azoxystrobin                                  | 131860-33-8 | Oncorhynchus mykiss | 4.093 | 3.192  | 2.934 |
| 332 | BCDM Hydantoin, 1-bromo-3-chloro-5,5-dimethyl | 16079-88-2  | Oncorhynchus mykiss | 1.493 | 2.650  | 3.237 |
| 333 | Bendiocarb                                    | 22781-23-3  | Oncorhynchus mykiss | 1.912 | 3.883  | 2.409 |
| 334 | Benfluralin Balan EC formulation              | 1861-40-1   | Oncorhynchus mykiss | 4.148 | 2.186  | 3.617 |
| 335 | Benomyl 50WP formulation                      | 17804-35-2  | Oncorhynchus mykiss | 2.572 | 3.329  | 3.232 |
| 336 | Bensulide                                     | 741-58-2    | Oncorhynchus mykiss | 4.423 | 2.836  | 2.742 |
| 337 | Benzyl bromoacetate                           | 5437-45-6   | Oncorhynchus mykiss | 2.125 | 2.998  | 3.260 |
| 338 | Bethoxazin BTCN metabolite (Canceled in U.S.) | 163269-30-5 | Oncorhynchus mykiss | 2.94  | 2.196  | 2.204 |
| 339 | Bifenazate                                    | 149877-41-8 | Oncorhynchus mykiss | 3.824 | 2.779  | 2.597 |
| 340 | Biobor JF (7.2% as boron)                     | 2665-13-6   | Oncorhynchus mykiss | 1.419 | -0.407 | 0.605 |



|     |                                                         |             |                     |        |       |       |
|-----|---------------------------------------------------------|-------------|---------------------|--------|-------|-------|
| 341 | Bioresmethrin<br>Bis (3-aminopropyl)dodecylamine)       | 28434-01-7  | Oncorhynchus mykiss | 5.152  | 5.626 | 5.737 |
| 342 | Lonzabac 12                                             | 2372-82-9   | Oncorhynchus mykiss | 3.907  | 3.613 | 2.122 |
| 343 | Bis (trichloromethyl) sulfone                           | 3064-70-8   | Oncorhynchus mykiss | 3.057  | 3.240 | 4.016 |
| 344 | Bitertanol                                              | 55179-31-2  | Oncorhynchus mykiss | 3.93   | 1.856 | 2.186 |
| 345 | Boscalid                                                | 188425-85-6 | Oncorhynchus mykiss | 4.258  | 1.809 | 2.104 |
| 346 | Brodifacoum                                             | 56073-10-0  | Oncorhynchus mykiss | 7.79   | 2.728 | 4.418 |
| 347 | Bromacil                                                | 314-40-9    | Oncorhynchus mykiss | 1.097  | 0.334 | 0.864 |
| 348 | Bromadiolone                                            | 28772-56-7  | Oncorhynchus mykiss | 7.184  | 3.342 | 2.576 |
| 349 | Bromonitrostyrene<br>Bromoxynil AXF 1240<br>formulation | 7166-19-0   | Oncorhynchus mykiss | 2.657  | 3.978 | 3.927 |
| 350 |                                                         | 1689-84-5   | Oncorhynchus mykiss | 2.789  | 0.573 | 1.187 |
| 351 | Bromoxynil butyrate                                     | 3861-41-4   | Oncorhynchus mykiss | 3.789  | 3.239 | 4.078 |
| 352 | Bromoxynil octanoate                                    | 1689-99-2   | Oncorhynchus mykiss | 5.349  | 3.549 | 3.605 |
| 353 | Bromuconazole (EXP 10064)                               | 116255-48-2 | Oncorhynchus mykiss | 3.664  | 3.647 | 2.346 |
| 354 | Bronopol                                                | 52-51-7     | Oncorhynchus mykiss | -0.661 | 2.097 | 1.000 |
| 355 | Butralin                                                | 33629-47-9  | Oncorhynchus mykiss | 4.011  | 3.391 | 2.902 |
| 356 | Butylate                                                | 2008-41-5   | Oncorhynchus mykiss | 3.372  | 1.233 | 1.986 |
| 357 | Cadusafos                                               | 95465-99-9  | Oncorhynchus mykiss | 5.194  | 5.172 | 3.311 |
| 358 | Carbendazim                                             | 10605-21-7  | Oncorhynchus mykiss | 1.259  | 3.240 | 3.120 |
| 359 | Carbofuran                                              | 1563-66-2   | Oncorhynchus mykiss | 2.118  | 3.882 | 2.786 |
| 360 | Carboxin                                                | 5234-68-4   | Oncorhynchus mykiss | 2.62   | 0.445 | 2.071 |
| 361 | Chlorethoxyfos                                          | 54593-83-8  | Oncorhynchus mykiss | 4.619  | 5.914 | 3.577 |
| 362 | Chlorfenapyr                                            | 122453-73-0 | Oncorhynchus mykiss | 5.455  | 4.718 | 4.739 |
| 363 | Chlorflurenol methyl ester                              | 37339-61-0  | Oncorhynchus mykiss | 2.729  | 1.564 | 2.374 |
| 364 | Chloroneb                                               | 2675-77-6   | Oncorhynchus mykiss | 3.011  | 1.524 | 1.748 |
| 365 | Chlorophacinone                                         | 3691-35-8   | Oncorhynchus mykiss | 4.736  | 2.944 | 3.172 |
| 366 | Chlorpropham                                            | 101-21-3    | Oncorhynchus mykiss | 3.297  | 1.762 | 1.850 |
| 367 | Chlorpyrifos                                            | 2921-88-2   | Oncorhynchus mykiss | 5.101  | 6.545 | 4.694 |
| 368 | Chlorpyrifos methyl                                     | 5598-13-0   | Oncorhynchus mykiss | 4.321  | 5.463 | 4.408 |

|     |                                                                         |                           |                     |                |                |                |
|-----|-------------------------------------------------------------------------|---------------------------|---------------------|----------------|----------------|----------------|
| 369 | Chlorthal dimethyl (DCPA or Dacthal)                                    | 1861-32-1                 | Oncorhynchus mykiss | 3.873          | 1.134          | 1.702          |
| 370 | Chromic acid                                                            | 7738-94-5                 | Oncorhynchus mykiss | -1.354         | 2.191          | 0.625          |
| 371 | Cinnamaldehyde                                                          | 104-55-2                  | Oncorhynchus mykiss | 1.899          | 1.273          | 1.898          |
| 372 | Clethodim                                                               | 99129-21-2                | Oncorhynchus mykiss | 4.844          | 1.251          | 1.277          |
| 373 | Clomazone                                                               | 81777-89-1                | Oncorhynchus mykiss | 2.64           | 1.664          | 1.101          |
| 374 | Cyanamide (Alzodef)                                                     | 420-04-2                  | Oncorhynchus mykiss | -0.574         | 0.798          | -0.342         |
| 375 | Cyanazine                                                               | 21725-46-2                | Oncorhynchus mykiss | 1.671          | 0.758          | 1.427          |
| 376 | Cyazofamid (400 SC formulation)                                         | 120116-88-3               | Oncorhynchus mykiss | 2.038          | 3.313          | 2.763          |
| 377 | Cycloate                                                                | 1134-23-2                 | Oncorhynchus mykiss | 3.514          | 0.953          | 1.680          |
| 378 | Cyflufenamid 149-F1 metabolite<br>Cyfluthrin (Tempo 2EC<br>Formulation) | 180409-60-3<br>68359-37-5 | Oncorhynchus mykiss | 4.431<br>6.317 | 1.457<br>7.240 | 2.598<br>6.168 |
| 380 | Cyhalothrin                                                             | 68085-85-8                | Oncorhynchus mykiss | 6.544          | 6.073          | 5.921          |
| 381 | Cyhexatin                                                               | 13121-70-5                | Oncorhynchus mykiss | 5.927          | 6.355          | 5.475          |
| 382 | Cymoxanil                                                               | 57966-95-7                | Oncorhynchus mykiss | -0.642         | 2.394          | 0.512          |
| 383 | Cyphenothrin                                                            | 39515-40-7                | Oncorhynchus mykiss | 5.825          | 5.941          | 6.043          |
| 384 | Cyproconazole                                                           | 94361-06-5                | Oncorhynchus mykiss | 2.865          | 1.050          | 1.186          |
| 385 | Cyprodinil                                                              | 121552-61-2               | Oncorhynchus mykiss | 3.406          | 3.848          | 1.971          |
| 386 | Daminozide                                                              | 1596-84-5                 | Oncorhynchus mykiss | -0.556         | 0.211          | 0.031          |
| 387 | Dazomet                                                                 | 533-74-4                  | Oncorhynchus mykiss | 0.797          | 2.692          | 3.006          |
| 388 | DBDMH Glybrom formulation                                               | 77-48-5                   | Oncorhynchus mykiss | 1.649          | 2.532          | 3.252          |
| 389 | DBNPA<br>DCDMH (Dantochlor<br>Formulation)                              | 10222-01-2<br>118-52-5    | Oncorhynchus mykiss | 0.481<br>1.337 | 2.449<br>2.622 | 2.384<br>2.335 |
| 391 | DDT (Cancelled in U.S.)                                                 | 50-29-3                   | Oncorhynchus mykiss | 6.496          | 4.878          | 4.937          |
| 392 | Deltamethrin                                                            | 52918-63-5                | Oncorhynchus mykiss | 6.49           | 6.662          | 6.306          |
| 393 | Desmedipham                                                             | 13684-56-5                | Oncorhynchus mykiss | 3.866          | 2.203          | 2.247          |
| 394 | Diazinon                                                                | 333-41-5                  | Oncorhynchus mykiss | 3.968          | 5.766          | 3.529          |
| 395 | Dibromodicyanobutane                                                    | 35691-65-7                | Oncorhynchus mykiss | 2.546          | 2.082          | 2.205          |
| 396 | Dicamba                                                                 | 1918-00-9                 | Oncorhynchus mykiss | 2.7            | 0.300          | 0.897          |
| 397 | Dichlobenil                                                             | 1194-65-6                 | Oncorhynchus mykiss | 2.865          | 1.443          | 1.543          |

|     |                                                                  |                          |                                            |                |                |                |
|-----|------------------------------------------------------------------|--------------------------|--------------------------------------------|----------------|----------------|----------------|
| 398 | Dichlormid<br>Dichlorprop (2,4-DP) Weedone<br>formulation        | 37764-25-3<br>120-36-5   | Oncorhynchus mykiss<br>Oncorhynchus mykiss | 1.991<br>2.845 | 0.169<br>4.647 | 0.169<br>2.672 |
| 399 | Dichlorvos in Muscalure Z-9<br>formulation                       | 62-73-7                  | Oncorhynchus mykiss                        | 2.68           | 2.311          | 3.344          |
| 400 | Diclofop-methyl                                                  | 51338-27-3               | Oncorhynchus mykiss                        | 4.726          | 3.171          | 3.303          |
| 401 | Dicloran (DCNA)                                                  | 99-30-9                  | Oncorhynchus mykiss                        | 2.484          | 2.000          | 2.568          |
| 402 | Dienochlor                                                       | 2227-17-0                | Oncorhynchus mykiss                        | 7.726          | 2.597          | 3.977          |
| 403 | Diethyl toluamide (DEET)                                         | 134-62-3                 | Oncorhynchus mykiss                        | 2.477          | 0.407          | 0.429          |
| 404 | Difenoconazole                                                   | 119446-68-3              | Oncorhynchus mykiss                        | 4.666          | 2.722          | 2.700          |
| 405 | Difethialone                                                     | 104653-34-1              | Oncorhynchus mykiss                        | 8.259          | 5.089          | 4.024          |
| 406 | Diiodomethyl p-tolyl sulfone<br>(Amical 48)                      | 20018-09-1               | Oncorhynchus mykiss                        | 2.922          | 3.774          | 3.511          |
| 407 | Dimethenamid<br>Dimethepin (Harvade 25F<br>formulation)          | 87674-68-8<br>55290-64-7 | Oncorhynchus mykiss<br>Oncorhynchus mykiss | 2.972<br>0.081 | 1.236<br>1.503 | 2.026<br>0.575 |
| 408 | Dinocap                                                          | 39300-45-3               | Oncorhynchus mykiss                        | 5.058          | 4.938          | 4.448          |
| 409 | Diphacinone                                                      | 82-66-6                  | Oncorhynchus mykiss                        | 4.083          | 2.277          | 2.082          |
| 410 | Diphenamid                                                       | 957-51-7                 | Oncorhynchus mykiss                        | 2.907          | 0.616          | 0.601          |
| 411 | Diphenylamine<br>Dipropyl isocinchomeronate MGK<br>326 repellent | 122-39-4<br>136-45-8     | Oncorhynchus mykiss<br>Oncorhynchus mykiss | 3.43<br>2.215  | 2.149<br>1.145 | 1.886<br>2.400 |
| 412 | Dithiopyr Dimension formulation                                  | 97886-45-8               | Oncorhynchus mykiss                        | 5.243          | 1.888          | 2.941          |
| 413 | Diuron Karmex DF Formulation                                     | 330-54-1                 | Oncorhynchus mykiss                        | 3.087          | 1.443          | 2.077          |
| 414 | D-Phenothrin (Sumithrin)                                         | 26002-80-2               | Oncorhynchus mykiss                        | 5.761          | 4.901          | 5.398          |
| 415 | DTEA                                                             | 36362-09-1               | Oncorhynchus mykiss                        | 3.819          | 3.781          | 2.451          |
| 416 | d-trans-Allethrin                                                | 584-79-2                 | Oncorhynchus mykiss                        | 4.002          | 4.531          | 4.494          |
| 417 | Endothall                                                        | 145-73-3                 | Oncorhynchus mykiss                        | -0.051         | 0.758          | 2.015          |
| 418 | Esfenvalerate<br>Ethalfuralin Sonalan EC<br>formulation          | 66230-04-4<br>55283-68-6 | Oncorhynchus mykiss<br>Oncorhynchus mykiss | 6.68<br>3.924  | 6.447<br>4.265 | 6.778<br>3.955 |
| 419 | Ethephon                                                         | 16672-87-0               | Oncorhynchus mykiss                        | 0.403          | 0.659          | 0.081          |
| 420 | Ethofenprox                                                      | 80844-07-1               | Oncorhynchus mykiss                        | 6.372          | 5.820          | 5.430          |

|     |                                        |             |                     |        |       |       |
|-----|----------------------------------------|-------------|---------------------|--------|-------|-------|
| 425 | Ethoprop                               | 13194-48-4  | Oncorhynchus mykiss | 4.417  | 3.753 | 2.324 |
| 426 | Ethoxyquin                             | 91-53-2     | Oncorhynchus mykiss | 3.693  | 2.036 | 1.082 |
| 427 | Ethyl N,N-dipropylthiocarbamate (EPTC) | 759-94-4    | Oncorhynchus mykiss | 2.982  | 1.128 | 0.977 |
| 428 | Farnesol                               | 4602-84-0   | Oncorhynchus mykiss | 4.398  | 2.005 | 2.092 |
| 429 | Fenamidone(RPA413255 s-enantiomer)     | 161326-34-7 | Oncorhynchus mykiss | 3.49   | 1.507 | 2.624 |
| 430 | Fenamiphos NemaCur 3 formulation       | 22224-92-6  | Oncorhynchus mykiss | 4.238  | 5.368 | 3.624 |
| 431 | Fenarimol                              | 60168-88-9  | Oncorhynchus mykiss | 4.068  | 1.688 | 2.198 |
| 432 | Fenazaquin                             | 120928-09-8 | Oncorhynchus mykiss | 4.549  | 4.738 | 3.154 |
| 433 | Fenbuconazole                          | 114369-43-6 | Oncorhynchus mykiss | 4.026  | 2.166 | 2.351 |
| 434 | Fenbutatin oxide                       | 13356-08-6  | Oncorhynchus mykiss | 16.761 | 4.531 | 5.792 |
| 435 | Fenhexamid                             | 126833-17-8 | Oncorhynchus mykiss | 4.608  | 0.459 | 2.353 |
| 436 | Fenoxaprop-ethyl                       | 66441-23-4  | Oncorhynchus mykiss | 4.604  | 2.056 | 2.030 |
| 437 | Fenoxycarb                             | 72490-01-8  | Oncorhynchus mykiss | 3.604  | 2.877 | 2.660 |
| 438 | Fenpropathrin                          | 39515-41-8  | Oncorhynchus mykiss | 5.269  | 5.819 | 5.182 |
| 439 | Fenpropimorph                          | 67564-91-4  | Oncorhynchus mykiss | 4.272  | 2.106 | 1.943 |
| 440 | Fenpyrazamine                          | 473798-59-3 | Oncorhynchus mykiss | 3.676  | 1.780 | 1.804 |
| 441 | Fenpyroximate FujiMite 5EC             | 134098-61-6 | Oncorhynchus mykiss | 5.027  | 5.421 | 5.854 |
| 442 | Fenthion                               | 55-38-9     | Oncorhynchus mykiss | 3.996  | 4.729 | 2.704 |
| 443 | Fenvalerate                            | 51630-58-1  | Oncorhynchus mykiss | 6.68   | 6.924 | 6.208 |
| 444 | Fipronil MB 46136 metabolite           | 120068-37-3 | Oncorhynchus mykiss | 4.877  | 4.178 | 4.149 |
| 445 | Flazasulfuron DTPU Degradate           | 104040-78-0 | Oncorhynchus mykiss | -0.236 | 0.390 | 0.549 |
| 446 | Fluazifop-butyl (PP009)                | 69806-50-4  | Oncorhynchus mykiss | 5.003  | 1.804 | 1.893 |
| 447 | Fluazinam                              | 79622-59-6  | Oncorhynchus mykiss | 5.986  | 3.412 | 4.111 |
| 448 | Fludioxonil(Maxim 4FS)                 | 131341-86-1 | Oncorhynchus mykiss | 2.393  | 2.441 | 2.723 |
| 449 | Flumioxazin                            | 103361-09-7 | Oncorhynchus mykiss | 1.928  | 1.809 | 2.188 |
| 450 | Fluometuron                            | 2164-17-2   | Oncorhynchus mykiss | 2.799  | 1.370 | 1.895 |
| 451 | Fluoxastrobin                          | 361377-29-9 | Oncorhynchus mykiss | 4.565  | 2.980 | 3.023 |
| 452 | Fluridone                              | 59756-60-4  | Oncorhynchus mykiss | 4.738  | 2.040 | 1.894 |
| 453 | Flurprimidol                           | 56425-91-3  | Oncorhynchus mykiss | 3.267  | 1.482 | 1.295 |

|     |                                              |             |                     |        |       |       |
|-----|----------------------------------------------|-------------|---------------------|--------|-------|-------|
| 454 | Flutriafol 125 g/L SC formulation            | 76674-21-0  | Oncorhynchus mykiss | 2.492  | 1.631 | 1.587 |
| 455 | Fluvalinate                                  | 69409-94-5  | Oncorhynchus mykiss | 7.396  | 6.099 | 5.359 |
| 456 | Fluxapyroxad                                 | 907204-31-3 | Oncorhynchus mykiss | 4.694  | 1.750 | 2.796 |
| 457 | Fonofos                                      | 944-22-9    | Oncorhynchus mykiss | 4.528  | 5.082 | 4.090 |
| 458 | Forchlorfenuron                              | 68157-60-8  | Oncorhynchus mykiss | 3.379  | 1.670 | 1.430 |
| 459 | Fosthiazate                                  | 98886-44-3  | Oncorhynchus mykiss | 3.832  | 3.037 | 1.561 |
| 460 | Furfural                                     | 98-01-1     | Oncorhynchus mykiss | 1.092  | 0.673 | 1.497 |
| 461 | Gamma cyhalothrin                            | 76703-62-3  | Oncorhynchus mykiss | 6.544  | 7.000 | 6.796 |
| 462 | Glutaraldehyde                               | 111-30-8    | Oncorhynchus mykiss | 0.554  | 2.125 | 1.023 |
| 463 | Grotan                                       | 4719-04-4   | Oncorhynchus mykiss | -2.245 | 0.924 | 0.718 |
| 464 | Hexaconazole JF 9445<br>formulation - test 1 | 79983-71-4  | Oncorhynchus mykiss | 3.663  | 2.218 | 1.917 |
| 465 | Hexazinone                                   | 51235-04-2  | Oncorhynchus mykiss | 0.513  | 0.473 | 0.236 |
| 466 | Hydramethylnon                               | 67485-29-4  | Oncorhynchus mykiss | 6.382  | 2.637 | 3.518 |
| 467 | Imazalil                                     | 35554-44-0  | Oncorhynchus mykiss | 4.134  | 1.973 | 2.303 |
| 468 | Imazamethabenz                               | 81405-85-8  | Oncorhynchus mykiss | 2.073  | 0.117 | 0.013 |
| 469 | Imazaquin                                    | 81335-37-7  | Oncorhynchus mykiss | 2.224  | 0.046 | 0.046 |
| 470 | Imidacloprid                                 | 138261-41-3 | Oncorhynchus mykiss | 0.383  | 0.477 | 0.048 |
| 471 | Imiprothrin (Pralle)                         | 72963-72-5  | Oncorhynchus mykiss | 1.623  | 3.795 | 3.923 |
| 472 | Indoxacarb IN-MP819                          | 173584-44-6 | Oncorhynchus mykiss | 4.093  | 3.916 | 4.342 |
| 473 | Inert Surfadone(LP100)                       | 2687-94-7   | Oncorhynchus mykiss | 1.706  | 1.299 | 0.929 |
| 474 | Ipconazole                                   | 125225-28-7 | Oncorhynchus mykiss | 3.588  | 2.293 | 2.339 |
| 475 | Iprodione                                    | 36734-19-7  | Oncorhynchus mykiss | 2.88   | 3.139 | 1.895 |
| 476 | Irgarol                                      | 28159-98-0  | Oncorhynchus mykiss | 2.378  | 1.679 | 2.529 |
| 477 | Isazophos methyl Triumph 4E<br>formulation   | 42509-83-1  | Oncorhynchus mykiss | 2.791  | 5.113 | 4.652 |
| 478 | Isopropalin                                  | 33820-53-0  | Oncorhynchus mykiss | 4.253  | 3.061 | 2.586 |
| 479 | Kepone (Cancelled in U.S.)                   | 143-50-0    | Oncorhynchus mykiss | 4.823  | 3.276 | 4.329 |
| 480 | Kresoxim methyl                              | 143390-89-0 | Oncorhynchus mykiss | 2.611  | 2.975 | 3.217 |
| 481 | Lactofen                                     | 77501-63-4  | Oncorhynchus mykiss | 5.168  | 2.363 | 2.096 |
| 482 | Lambda-Cyhalothrin                           | 91465-08-6  | Oncorhynchus mykiss | 6.544  | 7.051 | 6.374 |

|     |                                                               |             |                     |        |        |        |
|-----|---------------------------------------------------------------|-------------|---------------------|--------|--------|--------|
| 483 | Limonene                                                      | 138-86-3    | Oncorhynchus mykiss | 3.309  | 0.543  | 0.231  |
| 484 | Linalool                                                      | 78-70-6     | Oncorhynchus mykiss | 2.67   | 0.624  | 0.729  |
| 485 | Linuron                                                       | 330-55-2    | Oncorhynchus mykiss | 3.019  | 3.317  | 1.907  |
| 486 | L-Lactic acid                                                 | 79-33-4     | Oncorhynchus mykiss | -0.548 | -0.920 | -0.159 |
| 487 | Malathion                                                     | 121-75-5    | Oncorhynchus mykiss | 2.505  | 5.519  | 4.906  |
| 488 | Maleic hydrazide                                              | 123-33-1    | Oncorhynchus mykiss | -1.901 | 0.018  | -1.107 |
| 489 | Mandipropamid                                                 | 374726-62-2 | Oncorhynchus mykiss | 3.41   | 1.764  | 1.971  |
| 490 | MCPA 2-ethylhexyl ester                                       | 29450-45-1  | Oncorhynchus mykiss | 4.787  | 3.048  | 1.990  |
| 491 | Mefenpyr diethyl                                              | 135590-91-9 | Oncorhynchus mykiss | 3.444  | 1.824  | 1.949  |
| 492 | Mesotrione(MNBA metabolite)                                   | 104206-82-8 | Oncorhynchus mykiss | 1.119  | 0.404  | 0.355  |
| 493 | Metaflumizone 320 I formulation                               | 139968-49-3 | Oncorhynchus mykiss | 6.244  | 2.296  | 2.840  |
| 494 | Metalaxyl Ridomil 2E-G                                        | 57837-19-1  | Oncorhynchus mykiss | 1.844  | 1.349  | 1.181  |
| 495 | Metconazole (cis/trans isomers)                               | 125116-23-6 | Oncorhynchus mykiss | 3.342  | 1.734  | 1.773  |
| 496 | Methamidophos                                                 | 10265-92-6  | Oncorhynchus mykiss | 1.063  | 3.735  | 2.042  |
| 497 | Methidathion                                                  | 950-37-8    | Oncorhynchus mykiss | 1.904  | 4.674  | 4.480  |
| 498 | Methomyl                                                      | 16752-77-5  | Oncorhynchus mykiss | 1.039  | 4.266  | 2.276  |
| 499 | Methoprene                                                    | 40596-69-8  | Oncorhynchus mykiss | 5.062  | 2.543  | 2.488  |
| 500 | Methyl anthralinate                                           | 134-20-3    | Oncorhynchus mykiss | 1.055  | 0.919  | 0.820  |
| 501 | Methyl isothiocyanate                                         | 556-61-6    | Oncorhynchus mykiss | 0.719  | 2.983  | 3.155  |
| 502 | Methyl nonyl ketone                                           | 112-12-9    | Oncorhynchus mykiss | 3.716  | 2.499  | 1.754  |
| 503 | Methylisothiazolinone (Kathon OM formulation)                 | 2682-20-4   | Oncorhynchus mykiss | 0.447  | 2.806  | 3.216  |
| 504 | Metofluthrin                                                  | 240494-70-6 | Oncorhynchus mykiss | 4.281  | 4.885  | 5.478  |
| 505 | Metolachlor CGA-51502<br>Metrafenone CL 4084564<br>metabolite | 51218-45-2  | Oncorhynchus mykiss | 3.164  | 1.265  | 1.862  |
| 506 |                                                               | 220899-03-6 | Oncorhynchus mykiss | 4.331  | 0.905  | 1.413  |
| 507 | Metribuzin                                                    | 21087-64-9  | Oncorhynchus mykiss | 0.372  | 1.710  | 0.708  |
| 508 | MGK-264                                                       | 113-48-4    | Oncorhynchus mykiss | 3.006  | 2.078  | 3.213  |
| 509 | Mirex (Cancelled in U.S.)                                     | 2385-85-5   | Oncorhynchus mykiss | 7.664  | 2.442  | 4.375  |
| 510 | Mitin FF                                                      | 3567-25-7   | Oncorhynchus mykiss | 6.983  | 1.742  | 1.885  |
| 511 | MTI                                                           | 82633-79-2  | Oncorhynchus mykiss | 0.935  | 2.077  | 2.242  |

|     |                                                 |             |                     |       |        |        |
|-----|-------------------------------------------------|-------------|---------------------|-------|--------|--------|
| 512 | Myclobutanil                                    | 88671-89-0  | Oncorhynchus mykiss | 3.583 | 1.419  | 1.837  |
| 513 | N6-Benzyladenine                                | 1214-39-7   | Oncorhynchus mykiss | 1.435 | 1.041  | 1.022  |
| 514 | Naled                                           | 300-76-5    | Oncorhynchus mykiss | 3.651 | 6.104  | 3.467  |
| 515 | Naphthalene                                     | 91-20-3     | Oncorhynchus mykiss | 2.84  | 1.904  | 1.807  |
| 516 | Naphthaleneacetic acid                          | 86-87-3     | Oncorhynchus mykiss | 2.467 | 0.015  | 1.124  |
| 517 | Napropamide                                     | 15299-99-7  | Oncorhynchus mykiss | 3.476 | 1.278  | 1.460  |
| 518 | Neurolidol                                      | 7212-44-4   | Oncorhynchus mykiss | 3.197 | 2.237  | 2.324  |
| 519 | Niclosamide                                     | 1420-04-8   | Oncorhynchus mykiss | 3.86  | 3.214  | 4.100  |
| 520 | Nitrapyrin                                      | 1929-82-4   | Oncorhynchus mykiss | 3.562 | 2.021  | 2.002  |
| 521 | N-Methyl-2-pyrrolidine<br>N-methylneodecanamide | 120-94-5    | Oncorhynchus mykiss | 0.712 | -1.769 | -1.554 |
| 522 | (MNDA)                                          | 105726-67-8 | Oncorhynchus mykiss | 2.729 | 0.154  | 0.411  |
| 523 | Nonanoic acid                                   | 112-05-0    | Oncorhynchus mykiss | 2.822 | 0.217  | 0.240  |
| 524 | OBPA                                            | 58-36-6     | Oncorhynchus mykiss | 2.826 | 5.020  | 5.157  |
| 525 | Octhilinone                                     | 26530-20-1  | Oncorhynchus mykiss | 2.576 | 3.300  | 3.657  |
| 526 | Ortho-phenyl phenol                             | 90-43-7     | Oncorhynchus mykiss | 3.059 | 1.831  | 1.792  |
| 527 | Oryzalin                                        | 19044-88-3  | Oncorhynchus mykiss | 1.777 | 2.363  | 2.026  |
| 528 | Oxadiazon                                       | 19666-30-9  | Oncorhynchus mykiss | 4.217 | 2.814  | 2.517  |
| 529 | Oxamyl                                          | 23135-22-0  | Oncorhynchus mykiss | 0.107 | 2.669  | 1.773  |
| 530 | Oxazolidine E                                   | 7747-35-5   | Oncorhynchus mykiss | 0.413 | 0.533  | -0.188 |
| 531 | Oxycarboxin                                     | 5259-88-1   | Oncorhynchus mykiss | 1.302 | 0.588  | 1.128  |
| 532 | Oxydemeton-methyl                               | 301-12-2    | Oncorhynchus mykiss | 2.487 | 3.187  | 2.528  |
| 533 | Oxyfluorfen                                     | 42874-03-3  | Oncorhynchus mykiss | 5.458 | 3.655  | 3.160  |
| 534 | Oxythioquinox                                   | 2439-01-2   | Oncorhynchus mykiss | 2.575 | 3.291  | 3.263  |
| 535 | Paclobutrazol                                   | 76738-62-0  | Oncorhynchus mykiss | 3.122 | 0.947  | 1.024  |
| 536 | Paranitrophenol                                 | 100-02-7    | Oncorhynchus mykiss | 1.3   | 1.365  | 1.490  |
| 537 | Pebulate                                        | 1114-71-2   | Oncorhynchus mykiss | 3.372 | 1.474  | 1.439  |
| 538 | Pendimethalin                                   | 40487-42-1  | Oncorhynchus mykiss | 3.72  | 3.002  | 3.309  |
| 539 | Pentachloronitrobenzene (PCNB)                  | 82-68-8     | Oncorhynchus mykiss | 4.862 | 2.584  | 2.979  |
| 540 | Pentachlorophenol                               | 87-86-5     | Oncorhynchus mykiss | 4.659 | 2.295  | 3.550  |
| 541 | Penthiopyrad 20 SC formulation                  | 183675-82-3 | Oncorhynchus mykiss | 4.902 | 3.094  | 2.969  |

|     |                                            |             |                     |        |        |       |
|-----|--------------------------------------------|-------------|---------------------|--------|--------|-------|
| 542 | Permethrin 3.2 EC                          | 52645-53-1  | Oncorhynchus mykiss | 6.113  | 6.414  | 5.270 |
| 543 | Phenmedipham                               | 13684-63-4  | Oncorhynchus mykiss | 3.784  | 1.331  | 2.328 |
| 544 | Phenthoate (Cidial)                        | 2597-03-7   | Oncorhynchus mykiss | 3.924  | 5.227  | 4.426 |
| 545 | Phosalone                                  | 2310-17-0   | Oncorhynchus mykiss | 4.619  | 2.486  | 2.766 |
| 546 | Phosmet                                    | 732-11-6    | Oncorhynchus mykiss | 2.874  | 4.753  | 3.480 |
| 547 | Phosphoric acid Divosan X-Tend formulation | 7664-38-2   | Oncorhynchus mykiss | -0.929 | -0.030 | 0.052 |
| 548 | Picoxystrobin                              | 117428-22-5 | Oncorhynchus mykiss | 3.84   | 4.185  | 3.720 |
| 549 | Pinoxaden 100 EC formulation               | 243973-20-8 | Oncorhynchus mykiss | 3.732  | 2.291  | 2.232 |
| 550 | Piperonyl butoxide                         | 51-03-6     | Oncorhynchus mykiss | 3.718  | 2.822  | 2.274 |
| 551 | Prallethrin                                | 23031-36-9  | Oncorhynchus mykiss | 3.449  | 4.685  | 4.399 |
| 552 | Profenofos                                 | 41198-08-7  | Oncorhynchus mykiss | 5.769  | 5.604  | 4.250 |
| 553 | Prometryn                                  | 7287-19-6   | Oncorhynchus mykiss | 2.234  | 1.113  | 1.920 |
| 554 | Propachlor                                 | 1918-16-7   | Oncorhynchus mykiss | 2.667  | 1.487  | 3.095 |
| 555 | Propargite                                 | 2312-35-8   | Oncorhynchus mykiss | 4.517  | 3.675  | 3.473 |
| 556 | Propiconazole Tilt 3.6 E                   | 60207-90-1  | Oncorhynchus mykiss | 3.653  | 2.029  | 2.605 |
| 557 | Propionic acid                             | 79-09-4     | Oncorhynchus mykiss | 0.481  | 0.514  | 0.162 |
| 558 | Prothioconazole (JAU 6476 Technical)       | 178928-70-6 | Oncorhynchus mykiss | 2.857  | 2.458  | 2.309 |
| 559 | Pyraclostrobin                             | 175013-18-0 | Oncorhynchus mykiss | 4.239  | 4.393  | 4.796 |
| 560 | Pyraflufen-ethyl                           | 129630-19-9 | Oncorhynchus mykiss | 4.076  | 2.735  | 2.412 |
| 561 | Pyrethrins                                 | 8003-34-7   | Oncorhynchus mykiss | 3.711  | 4.507  | 4.864 |
| 562 | Pyridaben                                  | 96489-71-3  | Oncorhynchus mykiss | 5.242  | 5.838  | 5.705 |
| 563 | Pyridalyl                                  | 179101-81-6 | Oncorhynchus mykiss | 6.953  | 3.135  | 2.992 |
| 564 | Pyriproxyfen                               | 95737-68-1  | Oncorhynchus mykiss | 4.72   | 2.905  | 2.854 |
| 565 | Quinoxifen                                 | 124495-18-7 | Oncorhynchus mykiss | 5.473  | 3.530  | 3.057 |
| 566 | Quinalofop-ethyl                           | 76578-14-8  | Oncorhynchus mykiss | 4.406  | 2.003  | 2.632 |
| 567 | Resmethrin                                 | 10453-86-8  | Oncorhynchus mykiss | 5.152  | 6.187  | 6.082 |
| 568 | Rotenone                                   | 83-79-4     | Oncorhynchus mykiss | 3.703  | 5.028  | 5.317 |
| 569 | Ryanodine Ryan 50 powder                   | 15662-33-6  | Oncorhynchus mykiss | -0.67  | 4.050  | 2.188 |
| 570 | Sedaxane SYN524464 (trans + cis isomers)   | 874967-67-6 | Oncorhynchus mykiss | 4.124  | 1.745  | 2.520 |



| Sethoxydim Poast Herbicide |                                               |             |                     |       |        |       |
|----------------------------|-----------------------------------------------|-------------|---------------------|-------|--------|-------|
| 571                        | formulation                                   | 74051-80-2  | Oncorhynchus mykiss | 4.502 | 2.100  | 2.436 |
| 572                        | Simazine                                      | 122-34-9    | Oncorhynchus mykiss | 1.389 | 2.263  | 0.697 |
| 573                        | S-Metolachlor                                 | 87392-12-9  | Oncorhynchus mykiss | 3.164 | 1.038  | 1.377 |
| 574                        | Strychnine                                    | 57-24-9     | Oncorhynchus mykiss | 2.093 | 1.524  | 2.163 |
| 575                        | TCMTB                                         | 21564-17-0  | Oncorhynchus mykiss | 3.56  | 4.015  | 4.074 |
| 576                        | Tebuconazole                                  | 107534-96-3 | Oncorhynchus mykiss | 3.342 | 2.029  | 1.845 |
| 577                        | Tebufenozide                                  | 112410-23-8 | Oncorhynchus mykiss | 4.452 | 1.967  | 1.816 |
| 578                        | Tebufenpyrad                                  | 119168-77-3 | Oncorhynchus mykiss | 3.863 | 3.919  | 4.273 |
| 579                        | Tebuthiuron                                   | 34014-18-1  | Oncorhynchus mykiss | 1.611 | -0.114 | 0.203 |
| 580                        | Tefluthrin                                    | 79538-32-2  | Oncorhynchus mykiss | 5.552 | 6.777  | 6.844 |
| 581                        | Tepraloxydim (BAS 620 00 H)                   | 149979-41-9 | Oncorhynchus mykiss | 3.739 | 1.665  | 1.885 |
| 582                        | Terbacil                                      | 5902-51-2   | Oncorhynchus mykiss | 0.772 | 0.523  | 0.671 |
| 583                        | Terbufos                                      | 13071-79-9  | Oncorhynchus mykiss | 4.889 | 5.969  | 4.579 |
| 584                        | Terbutylazine                                 | 5915-41-3   | Oncorhynchus mykiss | 2.167 | 1.035  | 1.830 |
| 585                        | Terbutryn                                     | 886-50-0    | Oncorhynchus mykiss | 2.236 | 1.958  | 2.469 |
| 586                        | Tetraconazole                                 | 112281-77-3 | Oncorhynchus mykiss | 4.243 | 2.151  | 1.979 |
| 587                        | Tetrahydro-2(nitromethylene)-2H-1, 3-thiazine | 58842-20-9  | Oncorhynchus mykiss | 0.788 | 0.675  | 0.136 |
| 588                        | Thiabendazole                                 | 148-79-8    | Oncorhynchus mykiss | 2.204 | 2.812  | 2.556 |
| 589                        | Thiacloprid                                   | 111988-49-9 | Oncorhynchus mykiss | 2.121 | 1.050  | 0.923 |
| 590                        | Thiazopyr                                     | 117718-60-2 | Oncorhynchus mykiss | 4.517 | 1.813  | 2.067 |
| 591                        | Thidiazuron                                   | 51707-55-2  | Oncorhynchus mykiss | 2.182 | 1.587  | 1.523 |
| 592                        | Thiobencarb                                   | 28249-77-6  | Oncorhynchus mykiss | 4.035 | 3.406  | 2.390 |
| 593                        | Thiodicarb                                    | 59669-26-0  | Oncorhynchus mykiss | 2.601 | 4.118  | 2.012 |
| 594                        | Thiophanate-methyl                            | 23564-05-8  | Oncorhynchus mykiss | 1.792 | 1.810  | 1.626 |
| 595                        | Tolclofos-methyl                              | 57018-04-9  | Oncorhynchus mykiss | 4.581 | 0.798  | 2.640 |
| 596                        | Tolyfluanid                                   | 731-27-1    | Oncorhynchus mykiss | 3.314 | 3.262  | 4.064 |
| 597                        | Toxaphene (Cancelled in U.S.)                 | 8001-35-2   | Oncorhynchus mykiss | 6.073 | 4.615  | 5.359 |
| 598                        | Tralomethrin                                  | 66841-25-6  | Oncorhynchus mykiss | 7.461 | 7.232  | 5.619 |
| 599                        | Triadimefon                                   | 43121-43-3  | Oncorhynchus mykiss | 3.124 | 2.230  | 1.855 |

|     |                                               |             |                     |       |       |       |
|-----|-----------------------------------------------|-------------|---------------------|-------|-------|-------|
| 600 | Triadimenol                                   | 55219-65-3  | Oncorhynchus mykiss | 2.916 | 2.073 | 1.325 |
| 601 | Triallate                                     | 2303-17-5   | Oncorhynchus mykiss | 4.844 | 3.525 | 2.405 |
| 602 | Triazamate                                    | 112143-82-5 | Oncorhynchus mykiss | 1.76  | 4.351 | 2.773 |
| 603 | Tributyltin fluoride(TBTF)                    | 1983-10-4   | Oncorhynchus mykiss | 5.302 | 6.096 | 4.959 |
| 604 | Tributyltin oxide                             | 56-35-9     | Oncorhynchus mykiss | 9.695 | 5.553 | 5.027 |
| 605 | Trichloromelamine                             | 7673-09-8   | Oncorhynchus mykiss | 1.569 | 2.282 | 2.060 |
| 606 | Triclopyr acid<br>Triclopyr butoxyethyl ester | 55335-06-3  | Oncorhynchus mykiss | 2.505 | 0.286 | 0.341 |
| 607 | (Garlon 4)                                    | 64700-56-7  | Oncorhynchus mykiss | 3.781 | 3.008 | 2.739 |
| 608 | Tridiphane (DOWCO 356)                        | 58138-08-2  | Oncorhynchus mykiss | 4.979 | 3.108 | 2.781 |
| 609 | Trifloxystrobin                               | 141517-21-7 | Oncorhynchus mykiss | 4.17  | 4.208 | 4.465 |
| 610 | Triforine                                     | 26644-46-2  | Oncorhynchus mykiss | 1.489 | 1.191 | 1.308 |
| 611 | Trimethacarb                                  | 2686-99-9   | Oncorhynchus mykiss | 2.33  | 4.031 | 2.286 |
| 612 | Vinclozolin                                   | 50471-44-8  | Oncorhynchus mykiss | 3.421 | 1.894 | 2.003 |

**Table S3:** List of out of AD compounds in QSTR and QSAAR models by leverage approach

| S.No.                          | Model            | Chemical name | Chemical structure                                                                    |
|--------------------------------|------------------|---------------|---------------------------------------------------------------------------------------|
| <b>High leverage compounds</b> |                  |               |                                                                                       |
| 1.                             | L-QSTR<br>G-QSTR | Azadirachtin  | 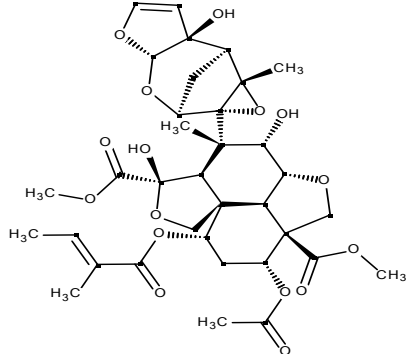 |

|    |                  |                              |                                                                                      |
|----|------------------|------------------------------|--------------------------------------------------------------------------------------|
| 2. | L-QSTR           | Diiodomethyl p-tolylsulfone) | 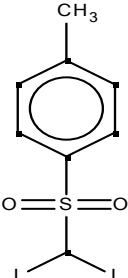  |
| 3. | L-QSTR<br>G-QSTR | Fenbutatin oxide             |   |
| 4. | L-QSTR<br>G-QSTR | OBPA                         |  |

|    |                  |                              |                                                                                                                                                                                                                                                                                                                                                                                                   |
|----|------------------|------------------------------|---------------------------------------------------------------------------------------------------------------------------------------------------------------------------------------------------------------------------------------------------------------------------------------------------------------------------------------------------------------------------------------------------|
| 5. | L-QSTR           | Spinosyn Factor D metabolite | 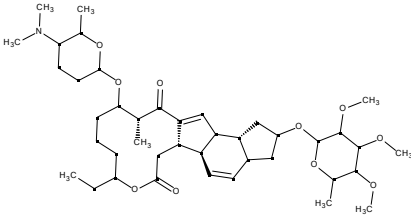 <p>The structure shows a complex polycyclic molecule with a central fused ring system, including a decalin core. It features several side chains, including a piperidine ring with a methyl group, and a sugar moiety with multiple methoxy groups.</p>                                                       |
| 6. | L-QSTR<br>G-QSTR | Streptomycin                 |  <p>The structure depicts the aminoglycoside Streptomycin, consisting of a streptidine ring linked to a 2-deoxystreptose sugar, which is further linked to a 2-amino-2-deoxyribose sugar. The streptidine ring has a methyl group on the nitrogen, and the 2-amino-2-deoxyribose has an amino group.</p>       |
| 7. | L-QSTR<br>G-QSTR | Sulfluramid                  |  <p>The structure shows Sulfluramid, a perfluorinated sulfonamide. It features a central sulfur atom double-bonded to two oxygen atoms and single-bonded to a nitrogen atom. The nitrogen atom is bonded to a methyl group and a perfluorinated ethyl chain (two carbons, each with two fluorine atoms).</p> |

|                                      |                           |                                  |  |
|--------------------------------------|---------------------------|----------------------------------|--|
| 8.                                   | L-QSTR<br>G-QSTR<br>QSAAR | Tributyltin oxide                |  |
| 9.                                   | L-QSTR                    | DBNPA                            |  |
| 10.                                  | G-QSTR                    | Temephos Abate 4E<br>formulation |  |
| High standardized residual compounds |                           |                                  |  |
| 10.                                  | L-QSTR<br>G-QSTR          | Dichlorprop (2,4-DP)             |  |

|     |                  |                          |                                                                                     |
|-----|------------------|--------------------------|-------------------------------------------------------------------------------------|
| 11. | L-QSTR<br>G-QSTR | Dichlorprop P (2,4-DP-p) | 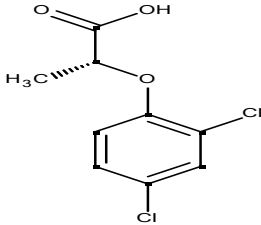 |
| 12  | G-QSTR           | Heptachlor               |  |

**Table S4:** List of out of AD compounds in QSTR and ISC QSAAR models by standardization approach

| L-QSTR Model |                                          | G-QSTR model |                  | ISC QSAAR model                       |                                    |
|--------------|------------------------------------------|--------------|------------------|---------------------------------------|------------------------------------|
| Data set     | Chemical name                            | Data set     | Chemical name    | Data set/species                      | Chemical name                      |
| Training     | Aspon                                    | Training     | Azadirachtin     | Training<br>( <i>L. macrochirus</i> ) | Brodifacoum                        |
| Training     | Azadirachtin                             | Training     | Chlorethoxyfos   | Training<br>( <i>L. macrochirus</i> ) | Dienochlor                         |
| Training     | Bis (trichloromethyl) sulfone            | Training     | Chromic acid     | Training<br>( <i>L. macrochirus</i> ) | Fenbutatin oxide                   |
| Training     | Chlorethoxyfos                           | Training     | Ethion           | Test<br>( <i>L. macrochirus</i> )     | Tributyltin oxide                  |
| Training     | Diiodomethyl p-tolyl sulfone (Amical 48) | Training     | Fenbutatin oxide | Training<br>( <i>O. mykiss</i> )      | Brodifacoum                        |
| Training     | Ethion                                   | Training     | OBPA             | Training<br>( <i>O. mykiss</i> )      | Cyfluthrin (Tempo 2EC Formulation) |

|          |                                  |          |                                                  |                                  |                              |
|----------|----------------------------------|----------|--------------------------------------------------|----------------------------------|------------------------------|
| Training | Fenbutatin oxide                 | Training | Phosphoric acid<br>Divosan X-Tend<br>formulation | Training<br>( <i>O. mykiss</i> ) | Dienochlor                   |
| Training | Naled                            | Training | Streptomycin                                     | Training<br>( <i>O. mykiss</i> ) | Fenbutatin oxide             |
| Training | OBPA                             | Training | Sulfluramid                                      | Test<br>( <i>O. mykiss</i> )     | Mirex (Cancelled in<br>U.S.) |
| Training | Ryanodine Ryan 50<br>powder      | Training | Temephos Abate 4E<br>formulation                 | Test<br>( <i>O. mykiss</i> )     | Tributyltin oxide            |
| Training | Spinosyn Factor D<br>metabolite  | Training | Tributyltin oxide                                |                                  |                              |
| Training | Streptomycin                     | Training | Tris(hydroxymethyl)n<br>itromethane              |                                  |                              |
| Training | Sulfluramid                      | Training | Glyphosine (Polaris<br>formula)                  |                                  |                              |
| Training | Temephos Abate 4E<br>formulation | Test     | Aspon (Ortho Sod-<br>Cancelled in U.S.)          |                                  |                              |
| Training | Tributyltin oxide                | Test     | Bis (trichloromethyl)<br>sulfone                 |                                  |                              |
| Test     | DBNPA                            | Test     | Malathion                                        |                                  |                              |
| Test     | Sulfotepp                        | Test     | Sulfotepp                                        |                                  |                              |
| Test     | Tricosene                        |          |                                                  |                                  |                              |
| Test     | Maneb 80WP                       |          |                                                  |                                  |                              |

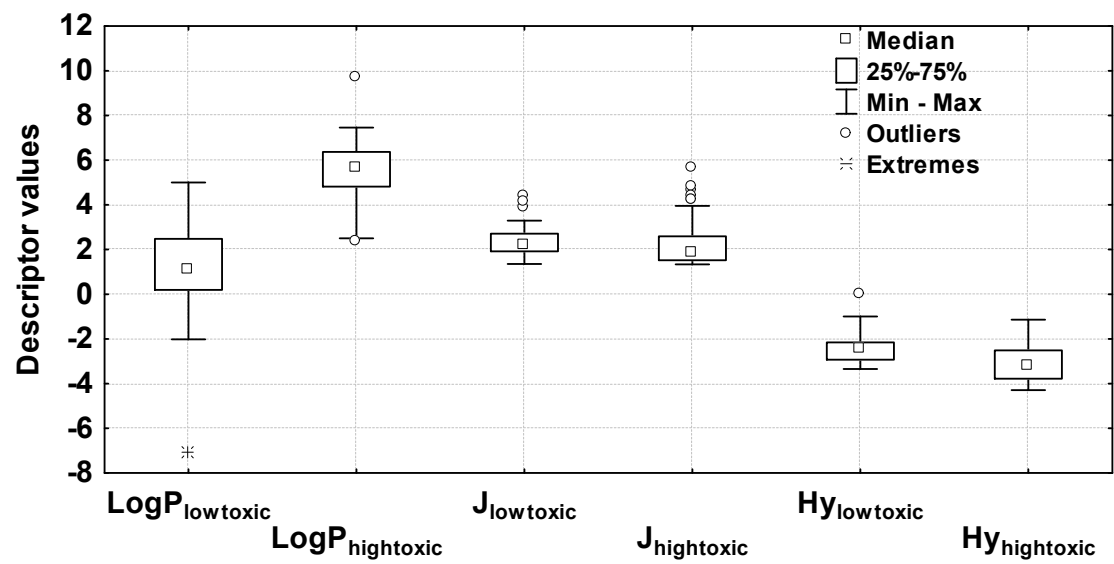

Figure S1a: Box- Whisker plot of the MDs (LogP, J, and Hy) in *D. magna* data



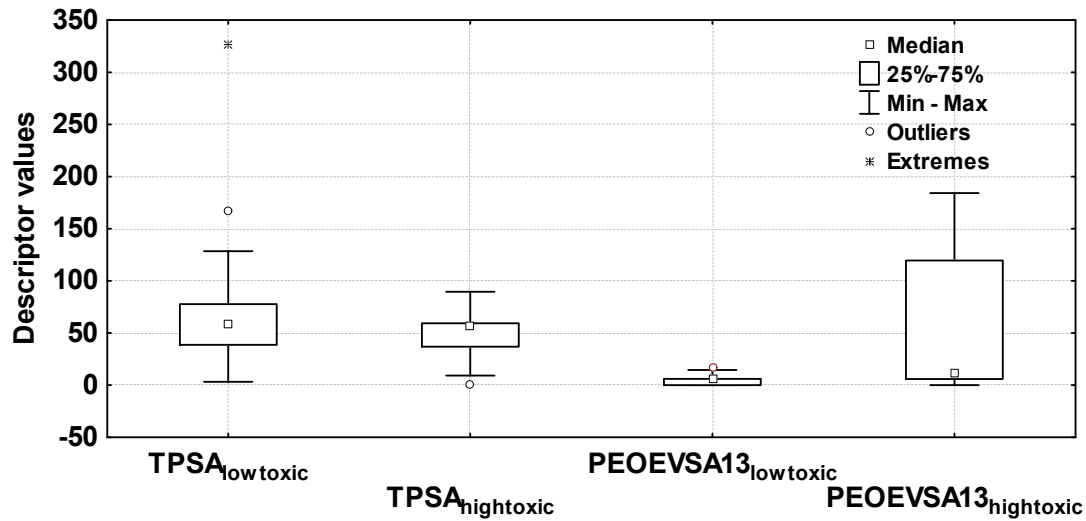

Figure S1b: Box- Whisker plot of the MDs (TPSA and PEOEVSA13) in *D. magna* data

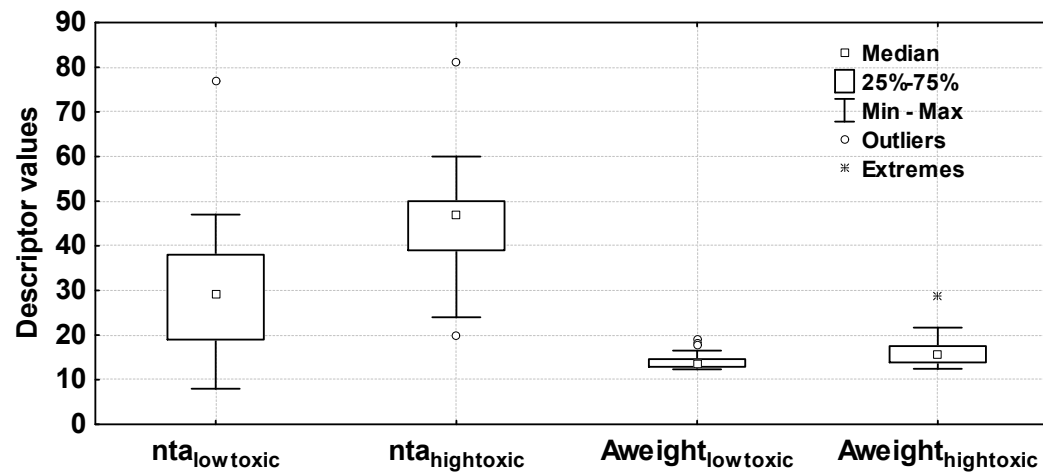

Figure S1c: Box- Whisker plot of the MDs (nta and Aweight) in *D. magna* data
